# Supplementary material for: Lipid droplet-associated hydrolase mobilizes stores of liver X receptor sterol ligands and protects against atherosclerosis
Source: PubMed Central journal article supplement (PMC11297204; doi:10.1038/s41467-024-50949-y), 2024-08-02
Supplement: 41467_2024_50949_MOESM1_ESM.pdf [file 41467_2024_50949_MOESM1_ESM.pdf]

(A)

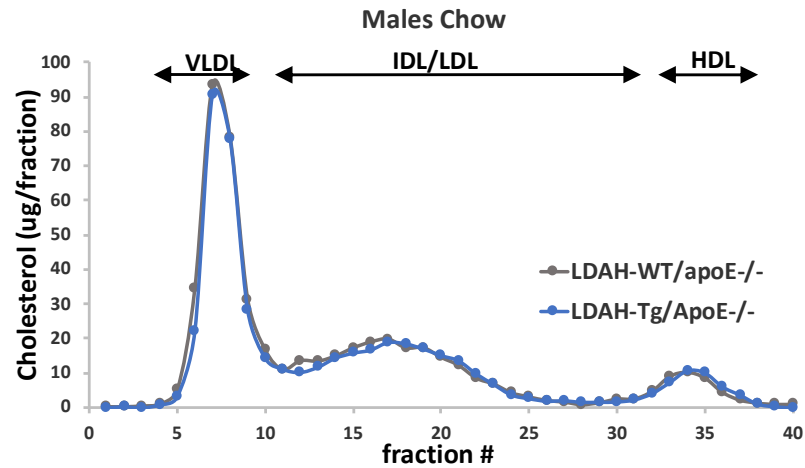

(B)

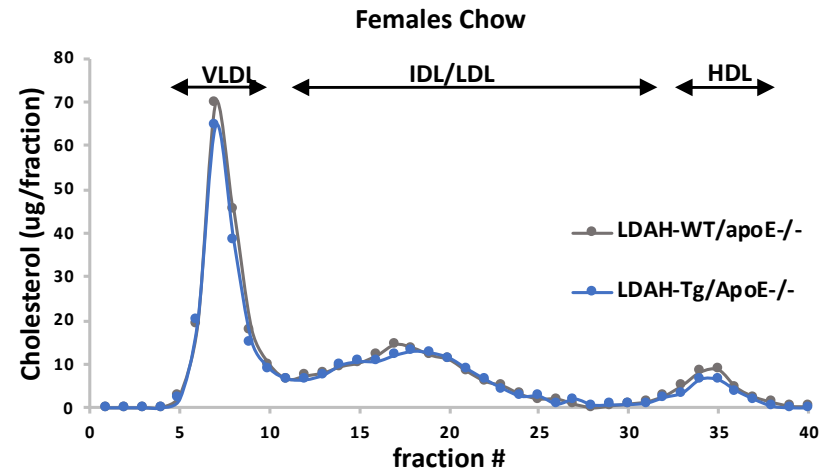

**Figure S1.** Cholesterol distribution in FPLC fractions of pooled plasma of wild-type (LDAH-WT/apoE<sup>-/-</sup>) and LDAH transgenic (LDAH-Tg/apoE<sup>-/-</sup>) mice used for atherosclerosis studies. **(A)** Males fed regular chow. **(B)** Females fed regular chow. VLDL: very low-density lipoprotein; IDL/LDL: intermediate-density lipoprotein/low-density lipoprotein; HDL: high-density lipoprotein.

(A)

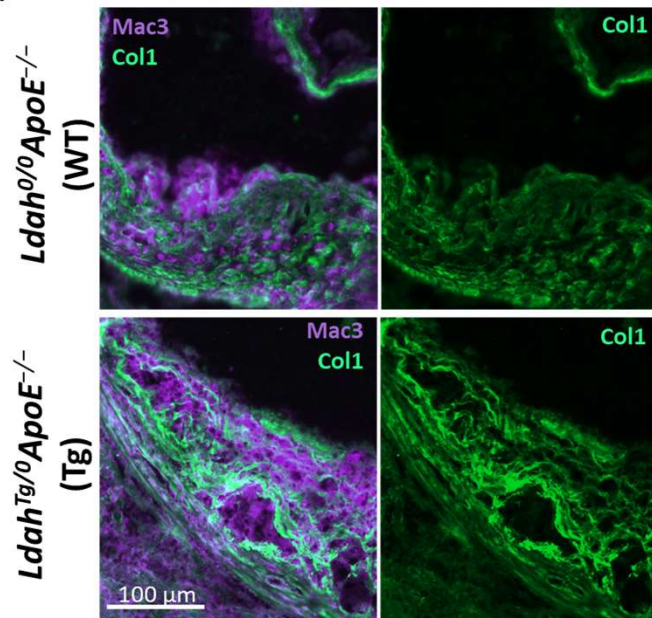

(B)

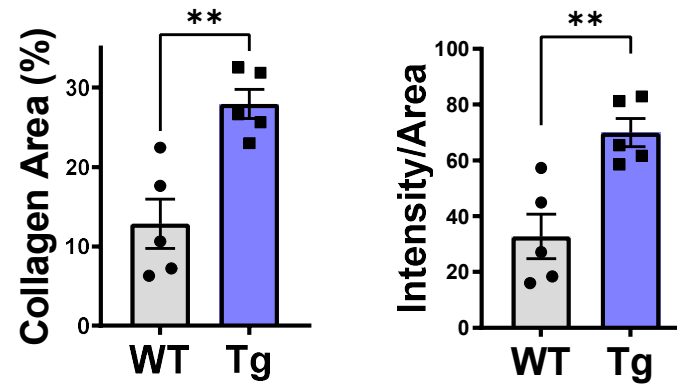

**Figure S2. (A)** Representative images showing increased fibrillar structures that stained positive with an anti-type I collagen antibody (green) in atherosclerotic lesions (outlined in white) of *Ldah<sup>Tg/0</sup>ApoE<sup>-/-</sup>* (Tg) male mice that are predominantly composed of Mac-3 positive cells (purple). Scale bar = 100  $\mu\text{m}$ . **(B)** Quantification of collagen I-positive areas (left panel) and of fluorescence intensity (right panel) in lesions of Tg (blue bars) and WT (grey bars) mice. Data are presented as mean  $\pm$  SEM from  $n=5$  independent samples per group. Comparisons were performed using two-tailed unpaired  $t$ -test. \*\* $P= 0.0032$  for Collagen Area (%) and \*\* $P= 0.0043$  for Intensity/Area.

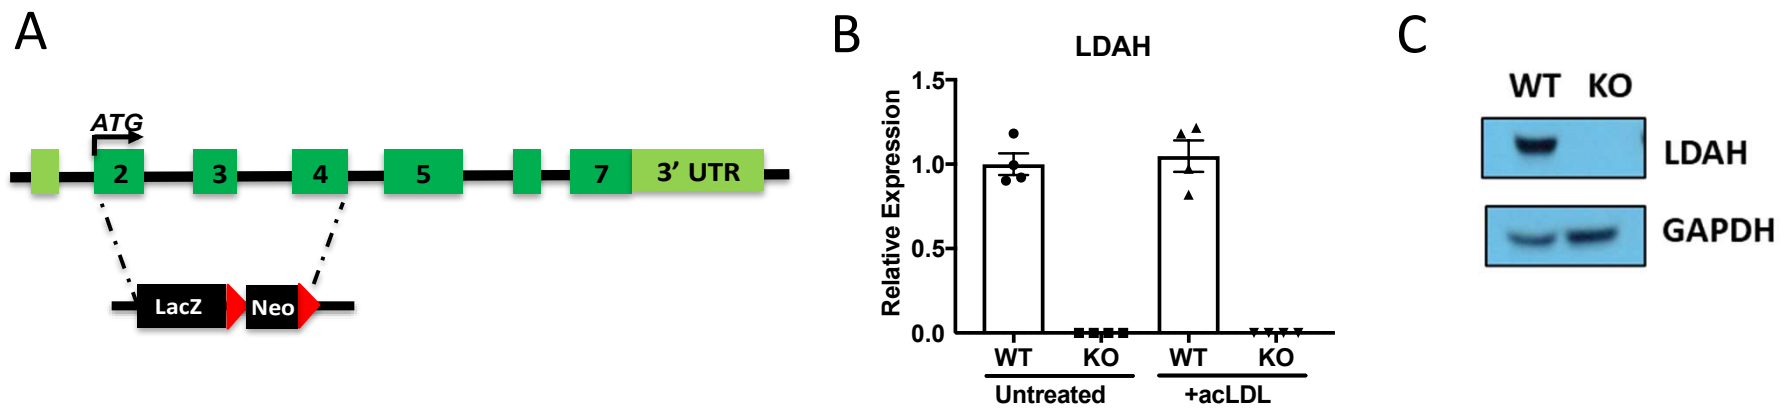

**Figure S3. (A)** LDAH gene targeting strategy by homologous recombination. **(B and C)** LDAH deficiency in peritoneal macrophages isolated from knockout (KO) mice was confirmed by **(B)** qPCR (n=3) and **(C)** Western blot. Data in panel B are presented as mean  $\pm$  SEM. The blot in panel C is representative of at least 3 independent experiments.

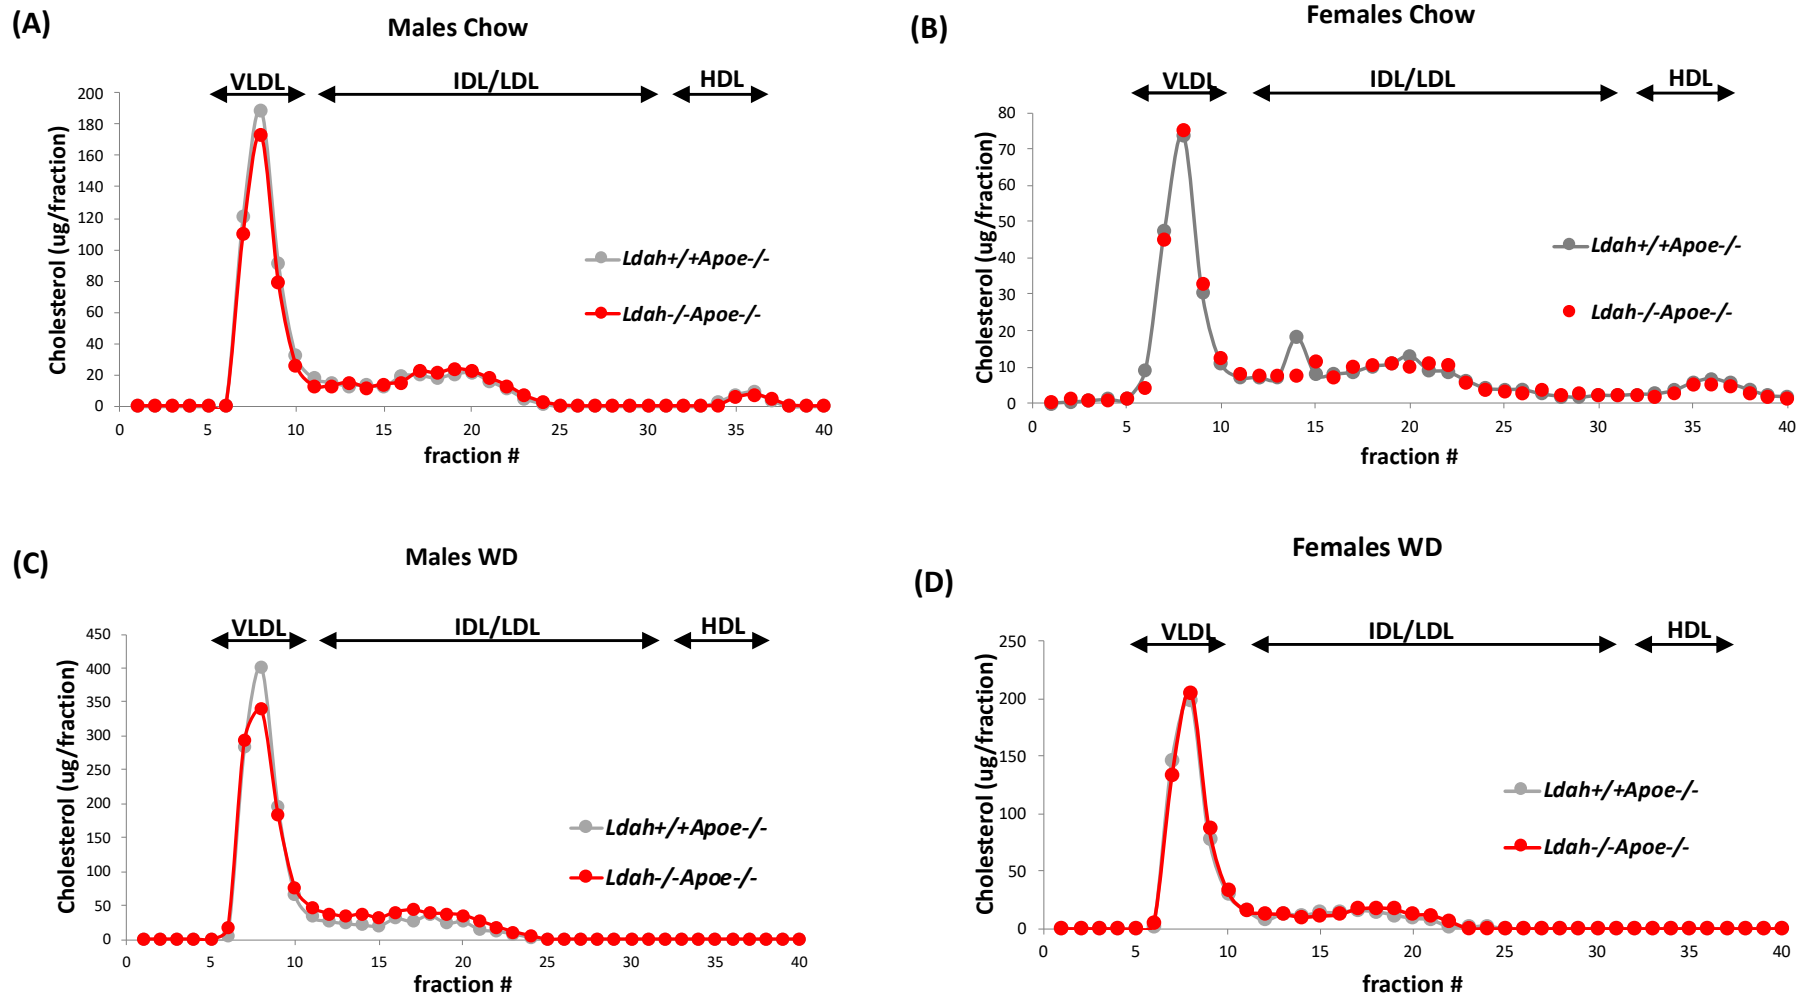

**Figure S4.** Cholesterol distribution in FPLC fractions of pooled plasma in the different experimental groups used to study the effects of LDAH deficiency on atherosclerosis development. **(A)** Males fed regular chow. **(B)** Females fed regular chow. **(C)** Males fed western diet (WD). **(D)** Females fed WD. VLDL: very low-density lipoprotein; IDL/LDL: intermediate-density lipoprotein/low-density lipoprotein; HDL: high-density lipoprotein.

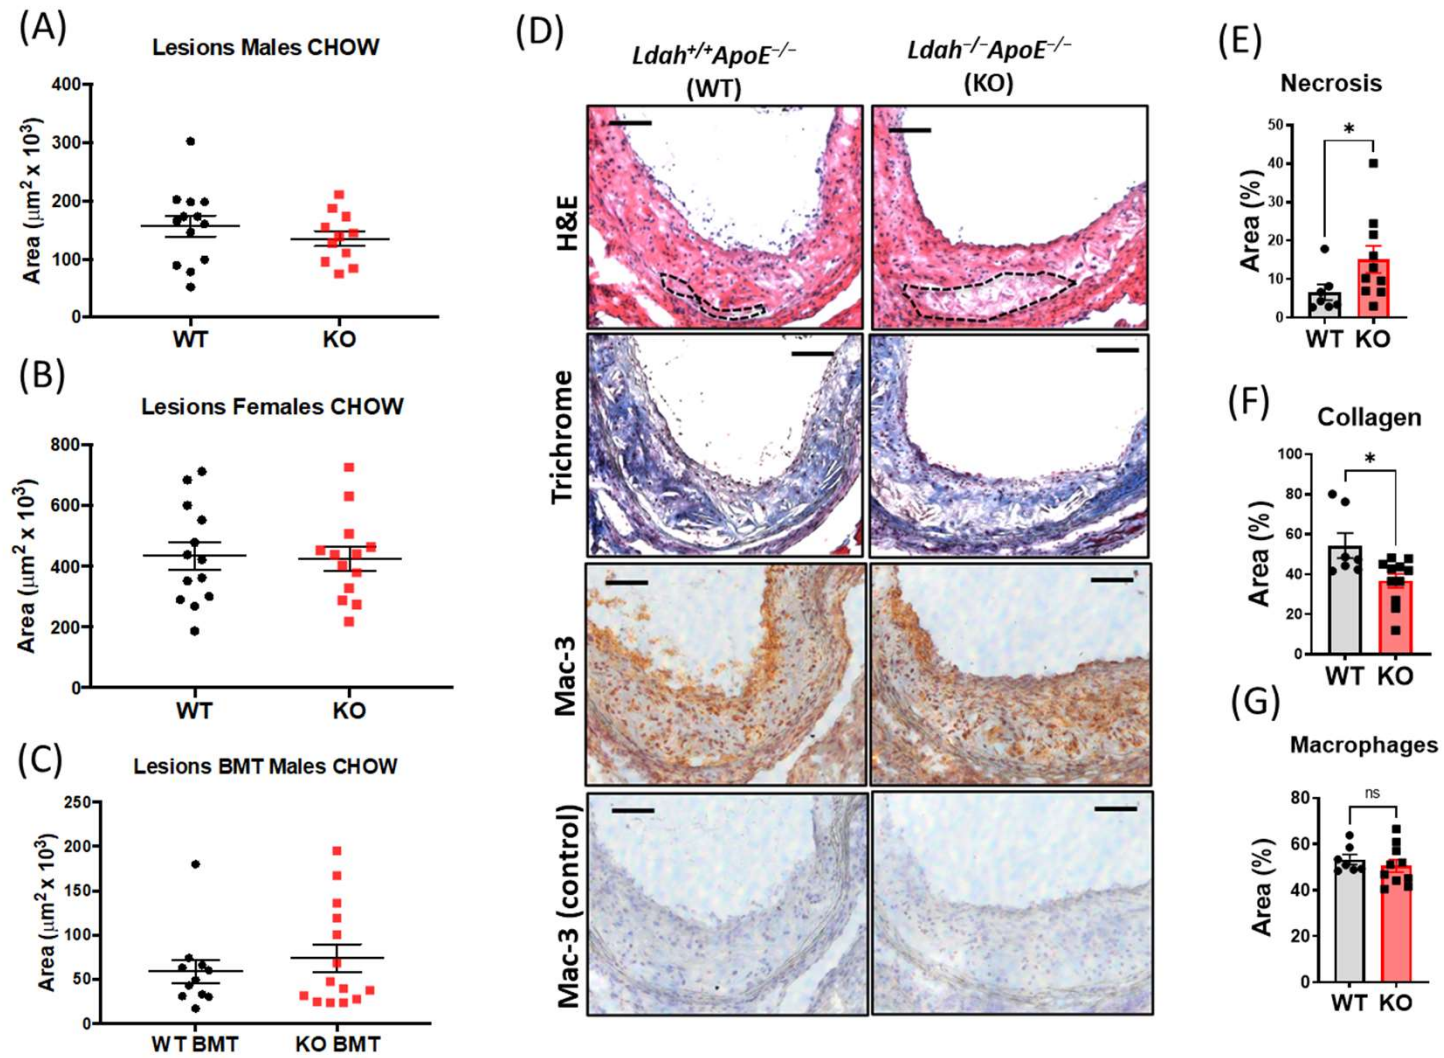

**Figure S5. Effects of LDAH deficiency on atherosclerosis development in mice fed standard mouse chow. (A-C)** In mice fed standard chow global or bone-marrow specific LDAH deficiency did not affect atherosclerosis development. **(A)** LDAH<sup>+/+</sup>/apoE<sup>-/-</sup> (wild-type, WT, black symbols, n=13) vs. global LDAH<sup>-/-</sup>/apoE<sup>-/-</sup> (KO, red symbols) males (n=11). **(B)** LDAH<sup>+/+</sup>/apoE<sup>-/-</sup> (wild-type, WT, black symbols, n=13) vs. global LDAH<sup>-/-</sup>/apoE<sup>-/-</sup> (KO, red symbols) females (n=13). **(C)** ApoE<sup>-/-</sup> male mice were transplanted with bone-marrow cells isolated from LDAH<sup>+/+</sup>/apoE<sup>-/-</sup> mice (WT BMT, black symbols, n=11 recipients) or from LDAH<sup>-/-</sup>/apoE<sup>-/-</sup> mice (KO BMT, red symbols, n=14 recipients). **(D)** Representative H&E, Mason's trichrome and Mac-3 images of lesions of female mice. Necrotic cores are outline in black in H&E images. For Mac-3 (control) sections were staining following the Mac-3 staining protocol, without incubation with Mac-3 antibody. Scale bar: 100  $\mu\text{m}$ . **(E)** Quantification of necrotic cores (n= 7 WT and n= 10 KO, \*p= 0.033), **(F)** Quantification of collagen (n=7 WT and n=11 KO, \*p=0.0441), **(G)** Quantification of % of lesion positive for Mac-3 (n=7 WT and n=10 KO, n.s.= not significant). Grey bars in E-G correspond to WT mice and red bars to KO mice. Data are presented as mean  $\pm$  SEM from independent samples. Panels C, E and F were analyzed by Mann-Whitney U. Panels A, B and G were analyzed using two-tailed unpaired t-test.

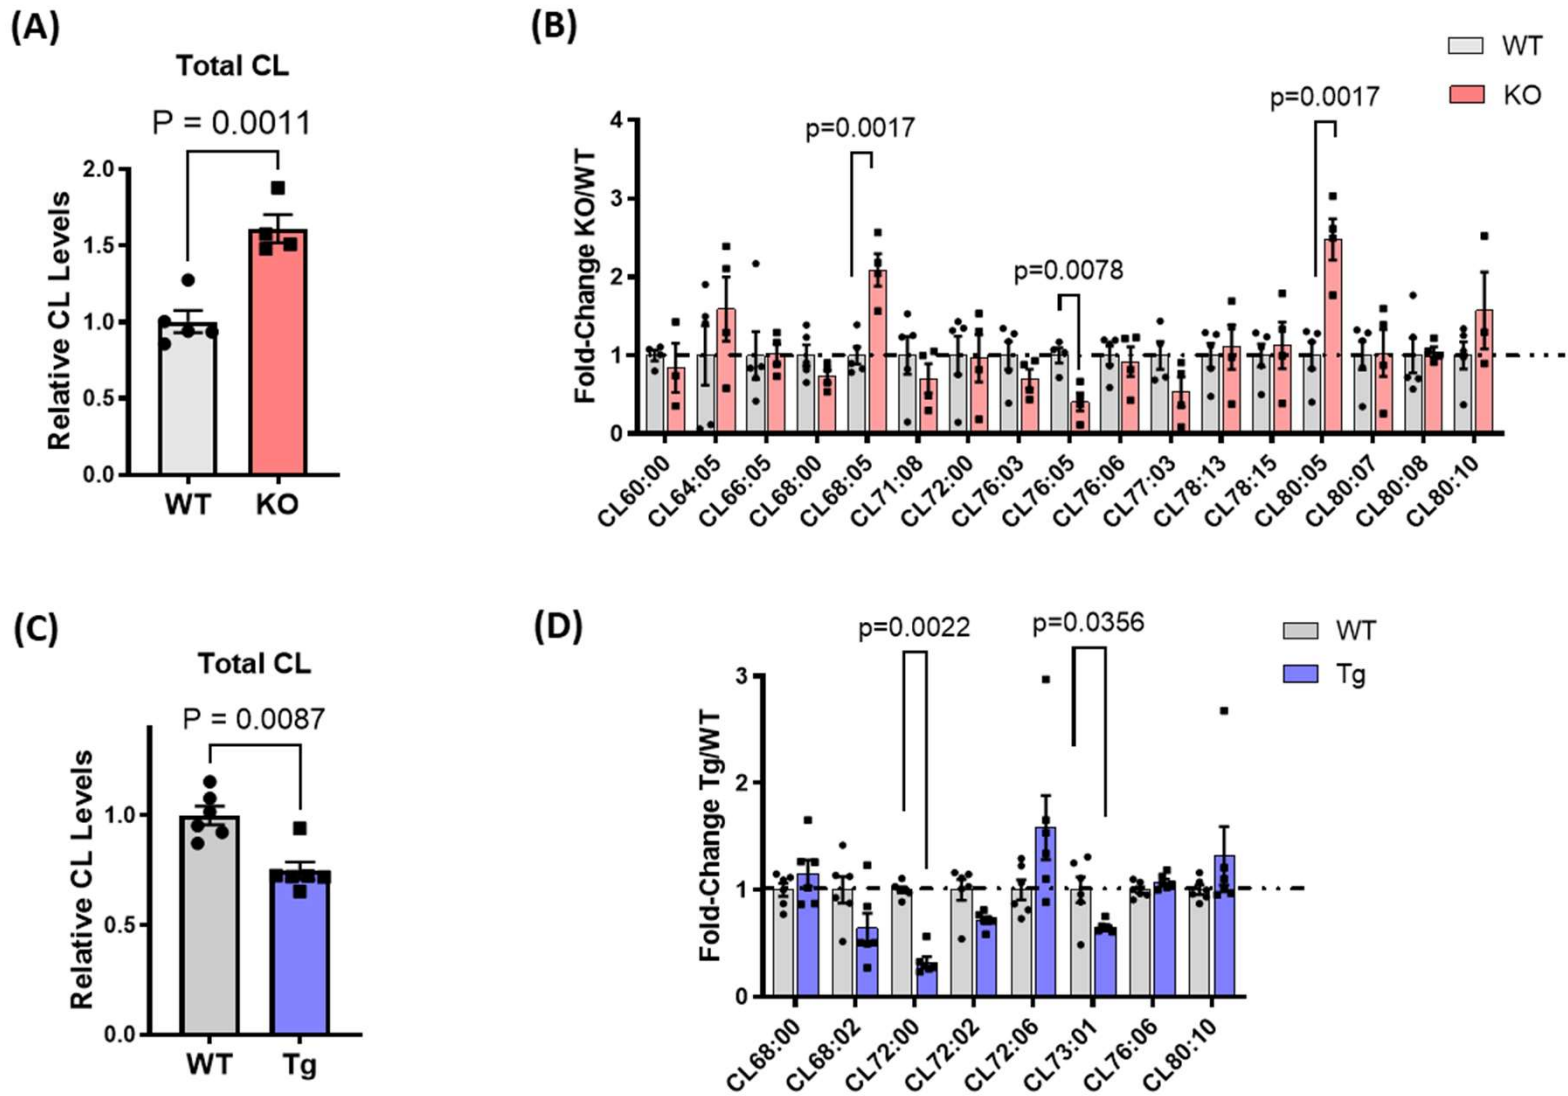

**Figure S6. Impact of LDAH deficiency and overexpression on total cardiolipin (CL) levels and on individual CL species. (A and B)** Relative levels of total cardiolipin and individual cardiolipin species in wild-type (WT, grey bars) and *Ldah*-KO (KO, red bars) peritoneal macrophages (PM) treated with oxLDL (50  $\mu$ g/ml) for 48h. **(A)** Total cardiolipin; **(B)** Main CL species identified by shotgun lipidomics. Bars represent mean  $\pm$  SEM of n=5 wild-type (WT) and n=4 *Ldah*-KO (KO) independent samples. **(C and D)** Relative levels of total cardiolipin and individual cardiolipin species in wild-type (WT, grey bars) and *Ldah*-Tg (Tg, blue bars) PM treated with oxLDL (50  $\mu$ g/ml) for 48h. **(A)** Total cardiolipin; **(B)** Main CL species identified by shotgun lipidomics. Bars represent mean  $\pm$  SEM of n=6 wild-type (WT) and n=6 *Ldah*-Tg (Tg) independent samples. Statistical analyses were performed by two-tailed unpaired *t*-test (CL 68:05, CL76:05, CL 80:05 in WT vs. KO), Welch's *t*-test (CL 73:01 in WT vs. Tg) or Mann-Whitney U (CL 72:00 in WT vs. Tg). The first numbers in the individual CL species shown in the X axis of panels **(B)** and **(D)** represent the sum of the carbon atoms in the four acyl chains of CL, and the numbers behind the colon indicate the total number of double bonds.

(A)

WT vs Tg

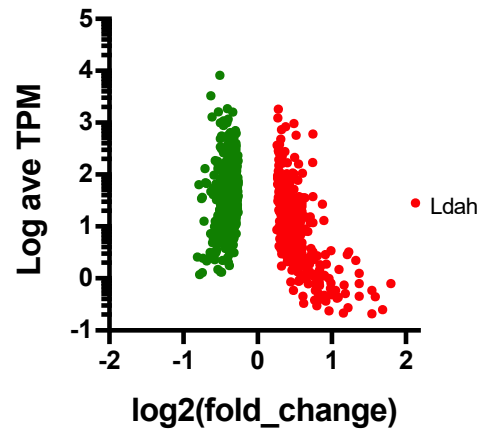

(B)

WT vs KO

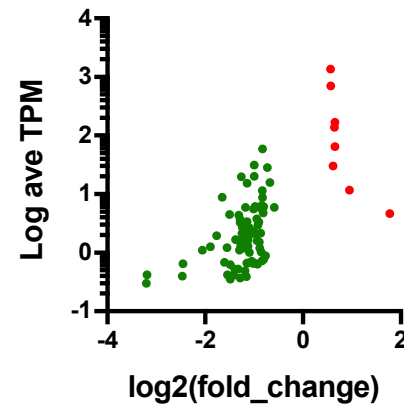

**Figure S7.** Volcano plots summarizing the distribution of of genes differentially expressed at an adjusted p value < 0.05 in the RNA-seq analyses . TPM: transcripts per million.

**A**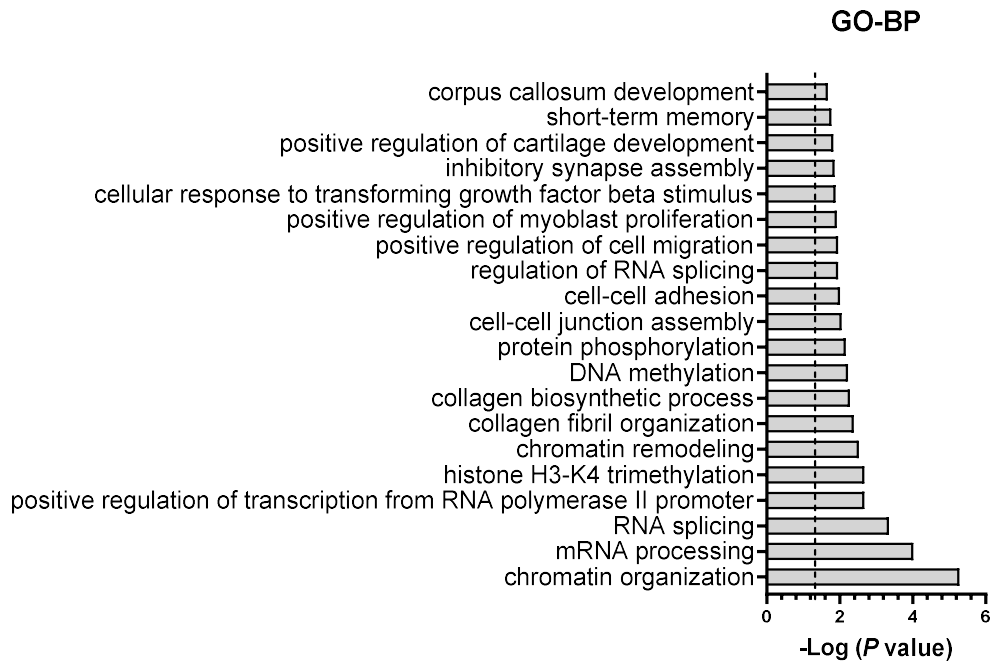**B**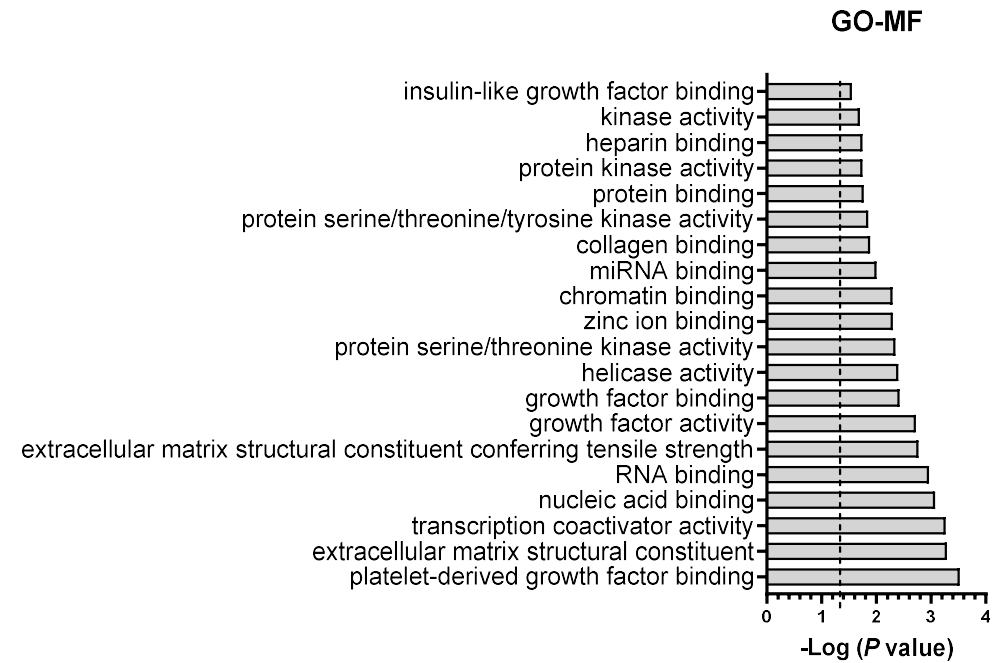

**Fig. S8.** Gene ontology (GO) analysis of genes with expression proportional to LDAH levels identified by RNA-seq was performed using the DAVID Bioinformatics platform. **(A)** GO Biological Process (BP) and **(B)** GO Molecular Function (MF) identified multiple terms related to collagenous extracellular matrix synthesis and organization.



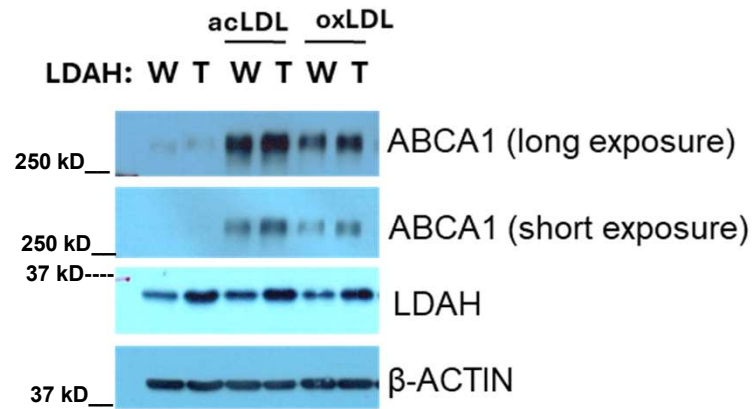

**Fig. S9.** ABCA1 and LDAH expression in wild-type (W) or LDAH-Tg (T) bone marrow macrophages (BMM) that remained untreated or were treated with acLDL (50  $\mu\text{g}/\text{mL}$ ) or oxLDL (50  $\mu\text{g}/\text{mL}$ ) for 48h. Blot is representative of 3 independent experiments.

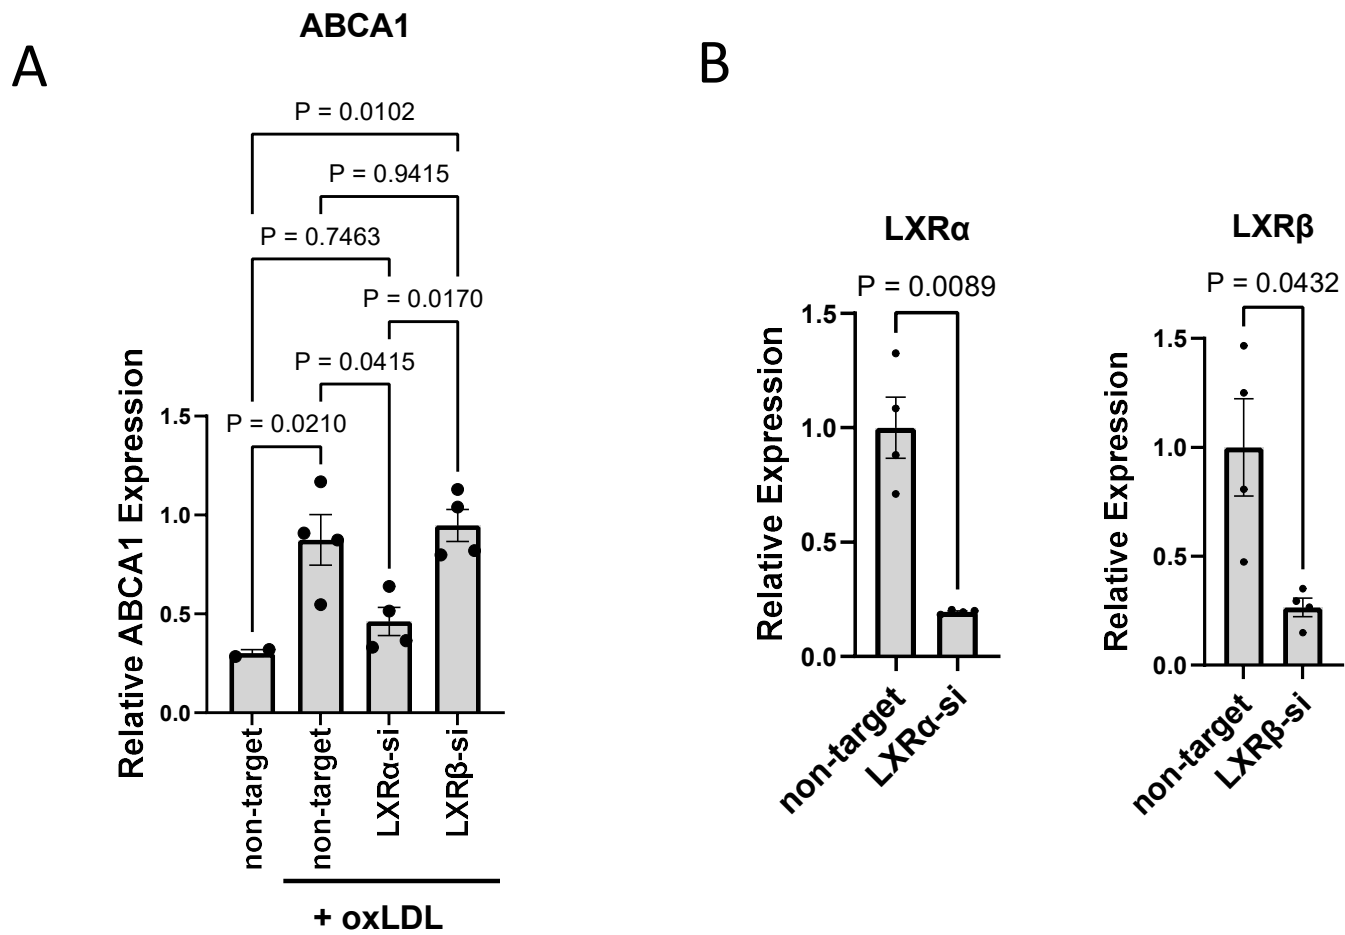

**Fig. S10. (A)** ABCA1 expression in response to oxLDL (50  $\mu$ g/mL for 48h) in bone marrow macrophages (BMM) treated with non-target siRNA or RNA against LXR $\alpha$  (LXR $\alpha$ -si) or LXR $\beta$  (LXR $\beta$ -si). **(B)** LXR $\alpha$  and LXR $\beta$  expression in oxLDL-treated BMM used for the experiments in **(A)**. Panel **(A)** was analyzed by one-way ANOVA followed by Tukey's test. Comparisons in panel **(B)** were performed using Welch's *t*-test. N=4/group.

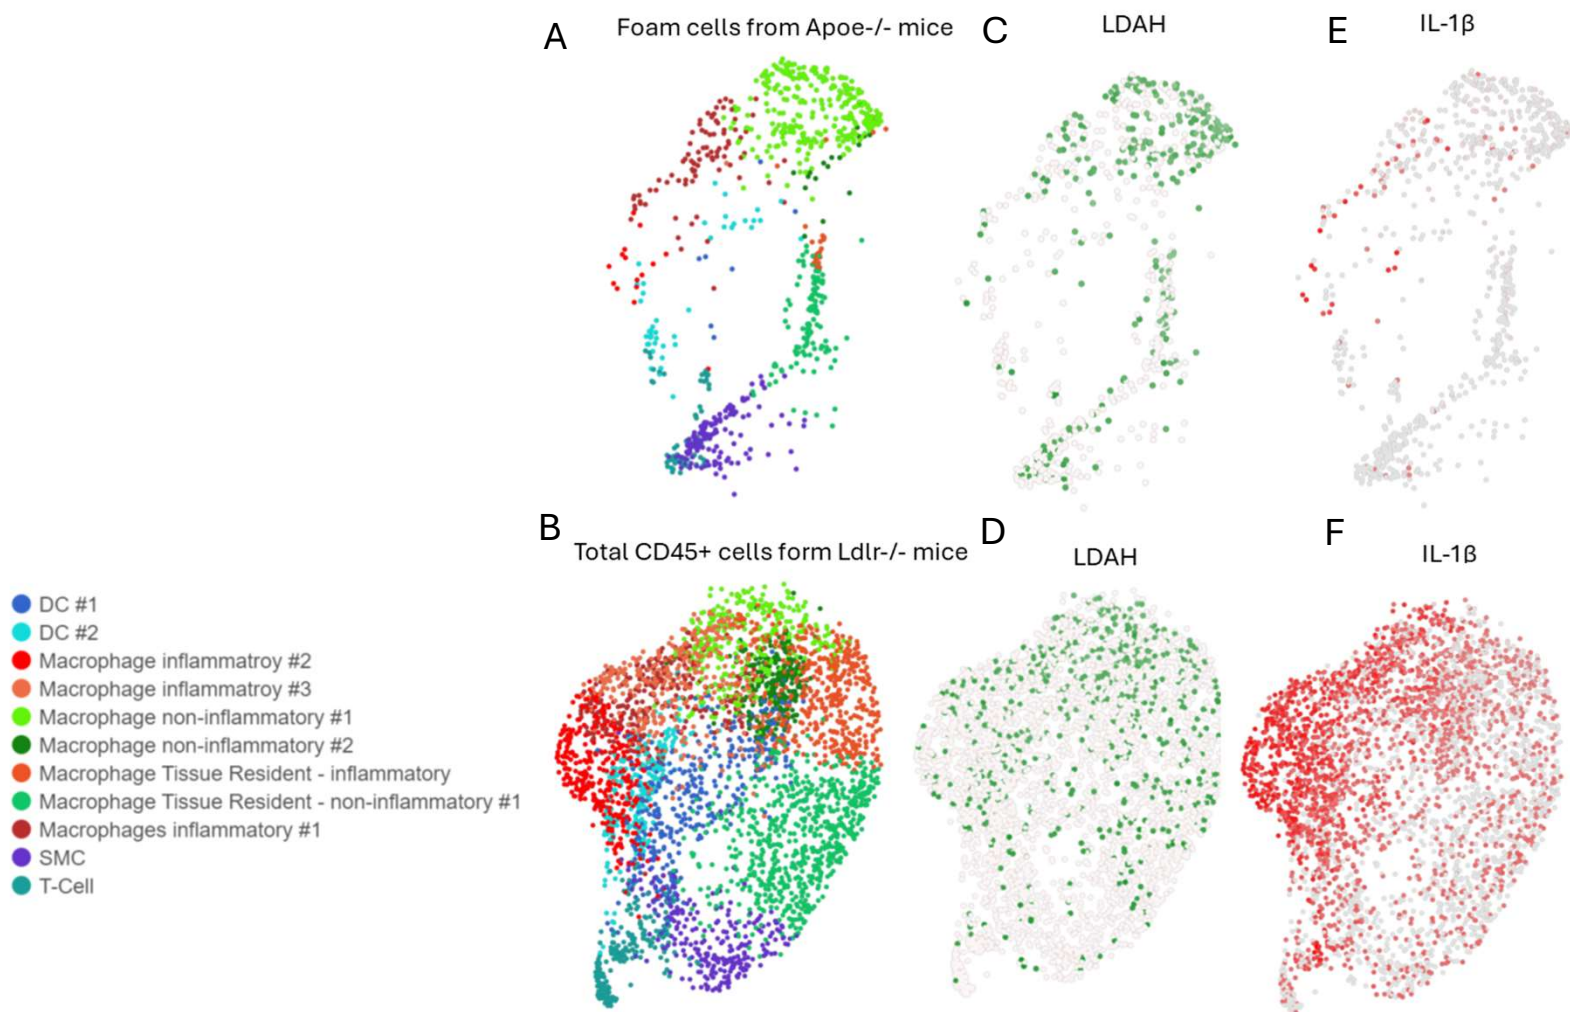

**Fig. S11.** Visualization of total t-SNE clustering and selected genes in the single cell RNA sequencing of aortic CD45<sup>+</sup> cells and foam cells from mouse atherosclerotic aortas. **(A-B)** Cluster distribution in foam cells from Apoe<sup>-/-</sup> mice **(A)** and total CD45<sup>+</sup> cells from Ldlr<sup>-/-</sup> mice **(B)**. **(C-F)** Visualization of LDAH **(C-D)** and IL-1 $\beta$  **(E-F)** in the 2 cell populations distribution in total CD45<sup>+</sup> and foam cell populations. Analysis was performed using the single cell sequencing data available in the GEO PRJNA477941 dataset.

## MAINLY INFLAMMATORY and IMMUNE PROCESSES

Macrophage Tissue Resident- inflammatory

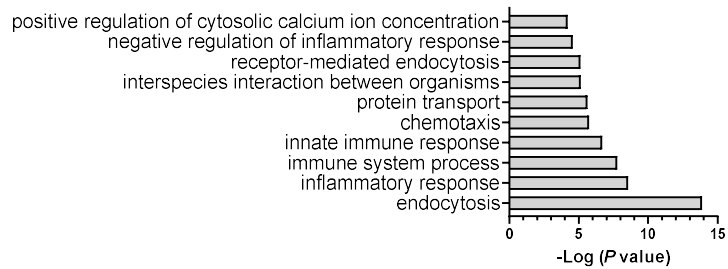

Macrophage Inflammatory #1

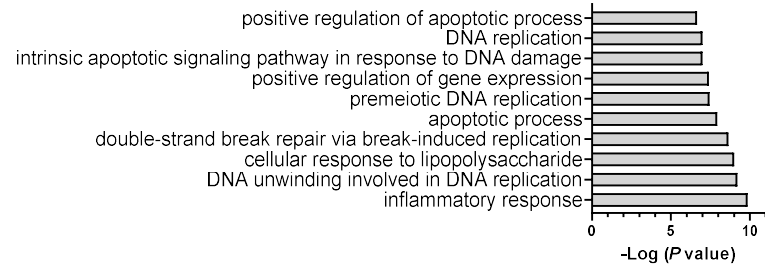

Macrophage Inflammatory #2

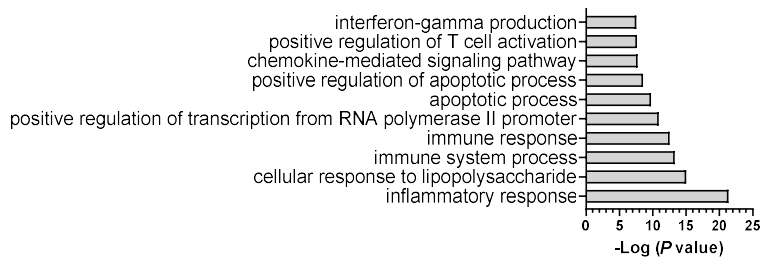

Macrophage Inflammatory #3

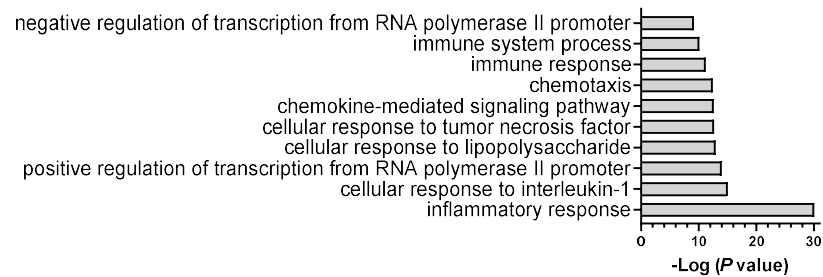

## MAINLY NON-INFLAMMATORY/IMMUNE PROCESSES

Macrophage Tissue Resident-non inflammatory #1

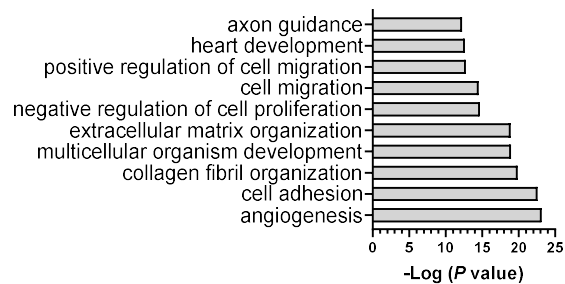

Macrophage non-inflammatory #1

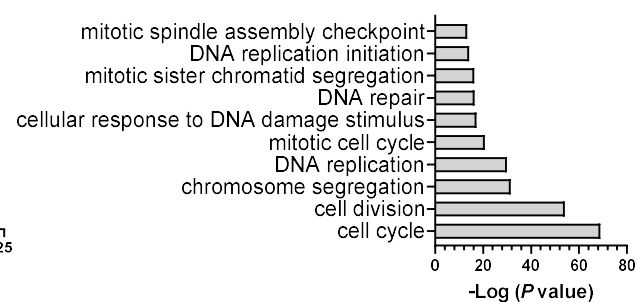

Macrophage non-inflammatory #2

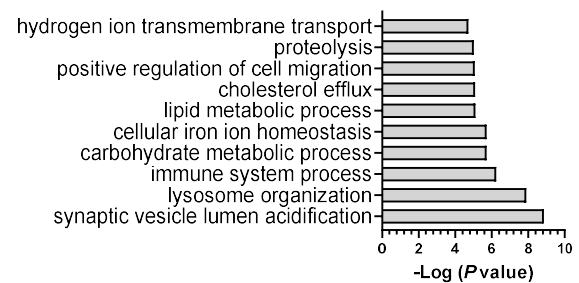

**Fig. S12.** Gene ontology (GO) analysis of genes in the macrophage clusters shown in **Figure S11**. Panels show the top 10 most significant GO Biological Process (BP) outputs. Analyses of macrophage clusters 3, 6, 7 and 8 showed high enrichment in inflammation and immune regulation regulated. Clusters 1, 2 and 11 were mainly enriched in biological processes not directly related to immune and inflammatory processes. Analyses were performed using the DAVID Bioinformatics platform.

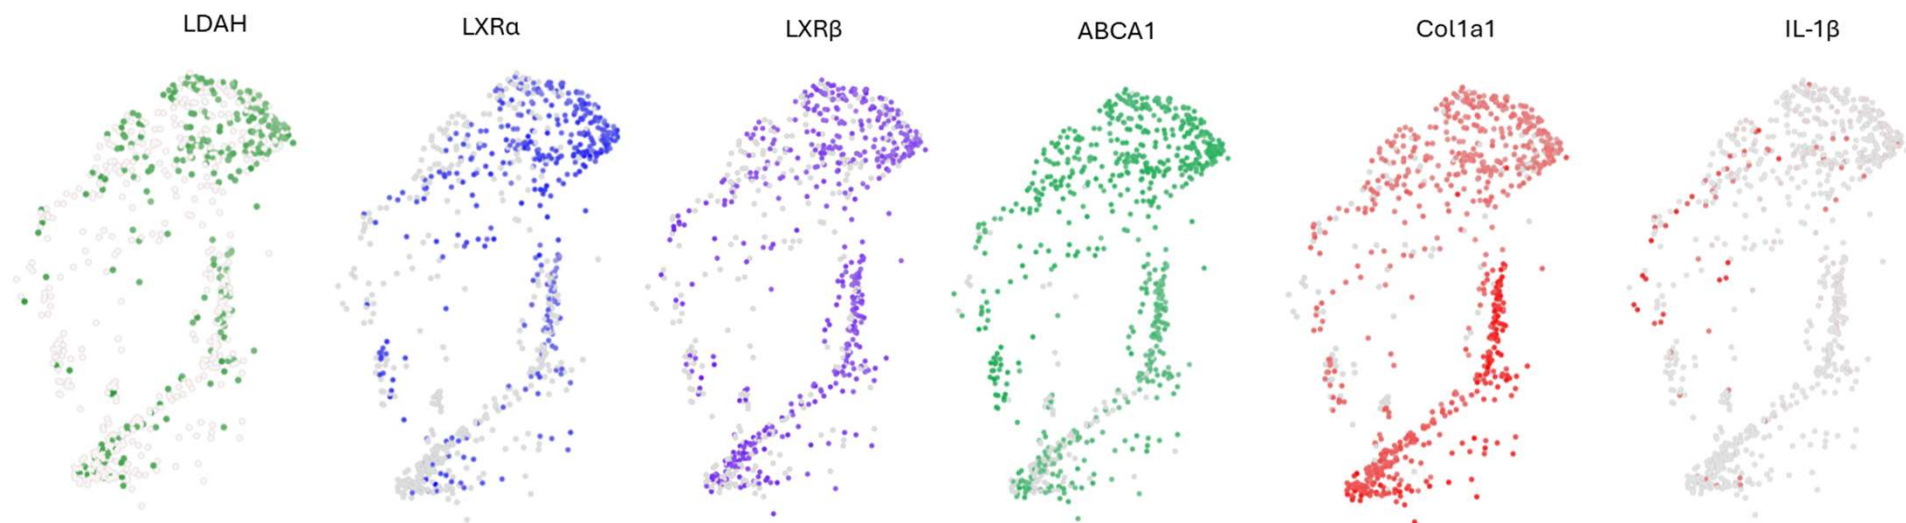

**Fig. S13.** Visualization of total t-SNEs for selected genes in the single cell RNA sequencing of aortic foam cells from *Apoe*<sup>-/-</sup> mice. Analysis was performed using the single cell sequencing data available in the GEO PRJNA477941 dataset.

**A**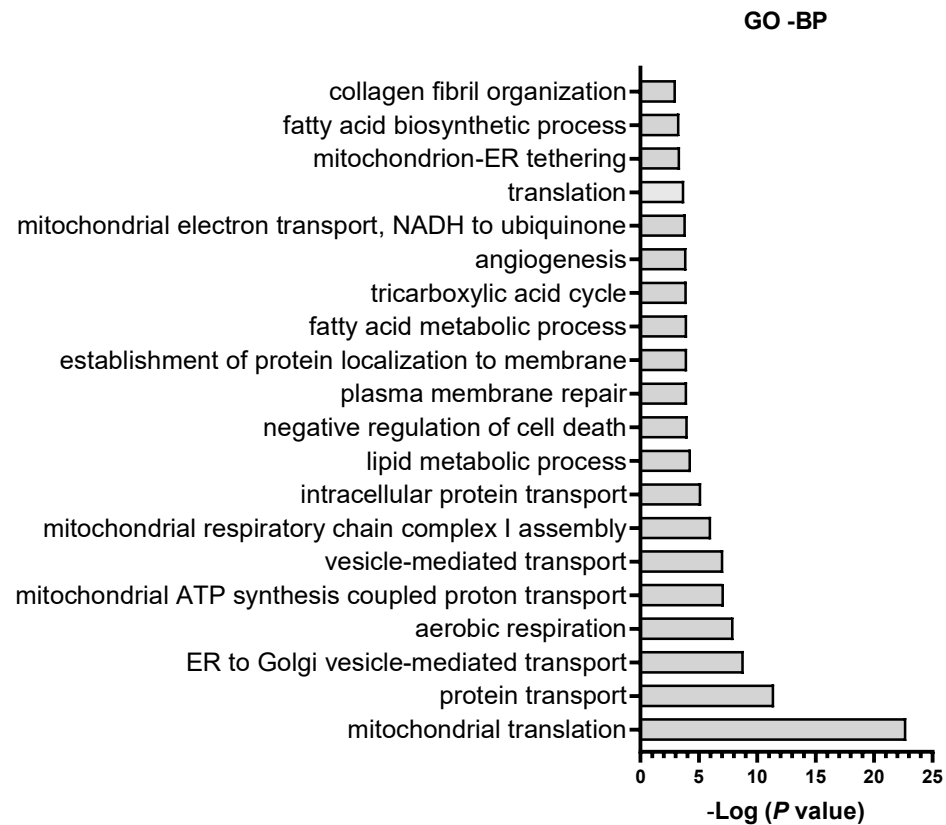**B**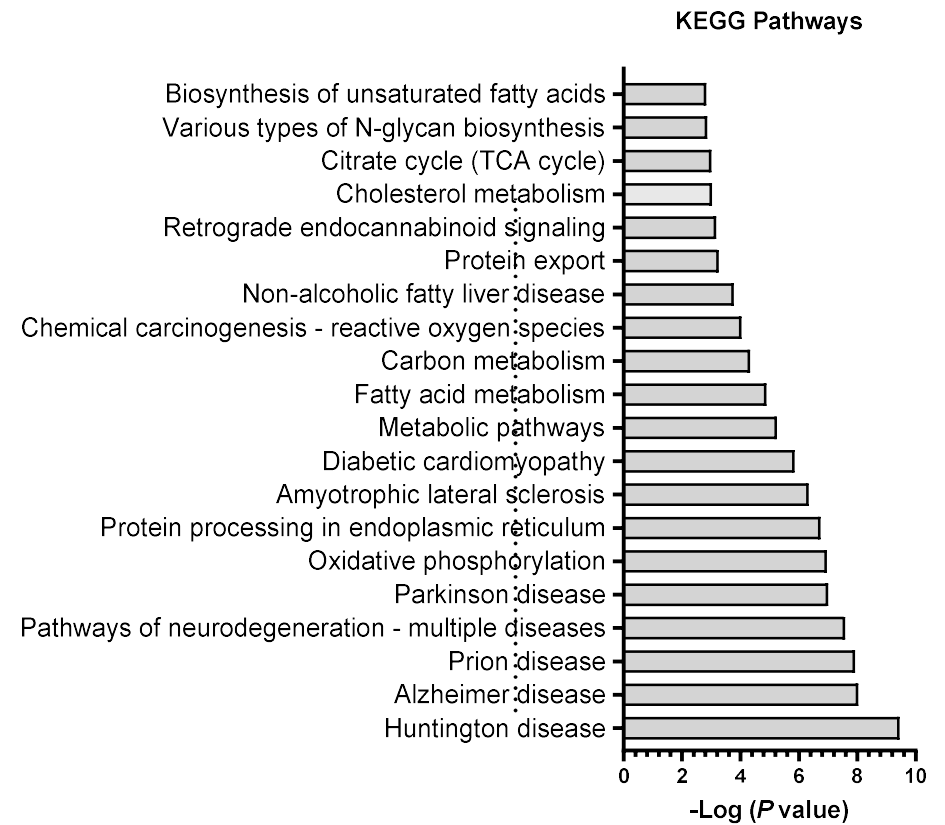

**Fig. S14.** Gene ontology (GO) and pathway analysis of genes that correlate with LDAH at a false discovery rate (FDR) <math><e-7</math> in the single cell RNA sequencing of aortic CD45+ cells and foam cells from mouse atherosclerotic aortas in GSE116240. Panels show the top 20 most significant GO Biological Process (BP) (**A**) and KEGG pathways (**B**) identified using the DAVID Bioinformatics platform. The analyses returned multiple metabolism and fibrosis-related terms, in the absence of inflammation-related terms.

**Table S1.** Body weights and plasma lipids in male and female *Ldah<sup>0/0</sup>/Apoe<sup>-/-</sup>* (WT) and *Ldah<sup>Tg/0</sup>/Apoe<sup>-/-</sup>* (*Ldah-Tg*) mice fed a standard chow diet.

|                             | Chow Diet  |                |            |                |
|-----------------------------|------------|----------------|------------|----------------|
|                             | Males      |                | Females    |                |
|                             | WT         | <i>Ldah-Tg</i> | WT         | <i>Ldah-Tg</i> |
| <b>Body weight (g)</b>      | 28.1 ± 0.6 | 27.1 ± 0.6     | 21.0 ± 0.6 | 21.8 ± 0.3     |
| <b>Triglyceride (mg/dL)</b> | 112 ± 12   | 126 ± 8        | 76 ± 4     | 80 ± 5         |
| <b>Cholesterol (mg/dL)</b>  | 610 ± 28   | 630 ± 86       | 447 ± 20   | 433 ± 17       |
| <b>HDL-C (mg/dL)</b>        | 27 ± 3     | 29 ± 2         | 19 ± 4     | 17 ± 2         |

**Table S2.** Body weights and plasma lipids in male and female *Ldah*<sup>+/+</sup>/*Apoe*<sup>-/-</sup> (WT) and *Ldah*<sup>-/-</sup>/*Apoe*<sup>-/-</sup> (*Ldah*-KO) mice fed a standard chow diet or western diet (WD).

|                      | Chow Diet    |                 |            |                 |
|----------------------|--------------|-----------------|------------|-----------------|
|                      | Males        |                 | Females    |                 |
|                      | WT           | <i>Ldah</i> -KO | WT         | <i>Ldah</i> -KO |
| Body weight (g)      | 28.5 ± 1.0   | 29.2 ± 1.1      | 21.0 ± 0.6 | 22.1 ± 0.4      |
| Triglyceride (mg/dL) | 130 ± 13     | 119 ± 14        | 65 ± 5     | 83 ± 8          |
| Cholesterol (mg/dL)  | 603 ± 31     | 546 ± 32        | 370 ± 21   | 413 ± 18        |
| HDL-C (mg/dL)        | 28 ± 3       | 28 ± 3          | 14 ± 1     | 17 ± 2          |
|                      | Western Diet |                 |            |                 |
|                      | Males        |                 | Females    |                 |
|                      | WT           | <i>Ldah</i> -KO | WT         | <i>Ldah</i> -KO |
| Body weight (g)      | 35.4 ± 1.3   | 35.2 ± 1.4      | 27.6 ± 1.3 | 26.3 ± 1.3      |
| Triglyceride (mg/dL) | 125 ± 8      | 115 ± 10        | 101 ± 5    | 95 ± 9          |
| Cholesterol (mg/dL)  | 1674 ± 61    | 1697 ± 65       | 960 ± 44   | 1011 ± 47       |
| HDL-C (mg/dL)        | 20 ± 3       | 20 ± 2          | 17 ± 1     | 17 ± 1          |



**Table S3. Main lipid classes and subclasses in *Ldah*-KO (K) vs. wild-type (WT) peritoneal macrophages treated with oxLDL (50 µg/ml).**  
Data are presented as normalized ion abundance per microgram of protein.

| Lipid Category                 | W1            | W2            | W3            | W4            | W5            | AVG           | SEM          | K1            | K2            | K3            | K4            | AVG           | SEM          |
|--------------------------------|---------------|---------------|---------------|---------------|---------------|---------------|--------------|---------------|---------------|---------------|---------------|---------------|--------------|
| Total Chol Esters              | 4.077         | 3.477         | 3.392         | 3.860         | 2.931         | 3.547         | 0.198        | 4.651         | 4.475         | 4.074         | 4.508         | 4.427         | 0.124        |
| Chol                           | 1.025         | 1.105         | 1.021         | 1.112         | 0.869         | 1.027         | 0.044        | 1.385         | 1.293         | 1.237         | 1.268         | 1.296         | 0.032        |
| <b>Total Sterols</b>           | <b>5.102</b>  | <b>4.582</b>  | <b>4.414</b>  | <b>4.972</b>  | <b>3.800</b>  | <b>4.574</b>  | <b>0.231</b> | <b>6.036</b>  | <b>5.768</b>  | <b>5.311</b>  | <b>5.777</b>  | <b>5.723</b>  | <b>0.151</b> |
| Total MG                       | N.D.          | 0.037         | 0.033         | 0.038         | 0.035         | 0.036         | 0.001        | 0.044         | 0.034         | 0.029         | 0.050         | 0.039         | 0.005        |
| Total DG                       | 0.327         | 0.174         | 0.172         | 0.197         | 0.153         | 0.205         | 0.031        | 0.193         | 0.187         | 0.168         | 0.176         | 0.181         | 0.006        |
| Total TG                       | 0.519         | 0.512         | 0.496         | 0.574         | 0.448         | 0.510         | 0.130        | 0.494         | 0.451         | 0.388         | 0.507         | 0.460         | 0.027        |
| <b>Total Neutral Lipids</b>    | <b>0.846</b>  | <b>0.724</b>  | <b>0.701</b>  | <b>0.810</b>  | <b>0.636</b>  | <b>0.751</b>  | <b>0.163</b> | <b>0.732</b>  | <b>0.671</b>  | <b>0.585</b>  | <b>0.733</b>  | <b>0.680</b>  | <b>0.037</b> |
| <b>NEFA</b>                    | <b>0.422</b>  | <b>0.523</b>  | <b>0.532</b>  | <b>0.523</b>  | <b>0.523</b>  | <b>0.505</b>  | <b>0.021</b> | <b>0.812</b>  | <b>0.544</b>  | <b>0.563</b>  | <b>0.566</b>  | <b>0.621</b>  | <b>0.064</b> |
| Total Lyso PC                  | N.D.          | 0.300         | 0.295         | 0.336         | 0.260         | 0.298         | 0.014        | 0.518         | 0.528         | 0.485         | 0.435         | 0.491         | 0.021        |
| Total Diacyl PC                | 17.243        | 15.893        | 15.837        | 18.079        | 13.650        | 16.140        | 0.753        | 25.596        | 23.849        | 21.823        | 22.267        | 23.384        | 0.856        |
| Total ePC                      | 1.390         | 1.592         | 1.602         | 1.828         | 1.389         | 1.560         | 0.081        | 2.672         | 2.528         | 2.292         | 2.339         | 2.458         | 0.088        |
| Total Ox-PC                    | 0.047         | 0.014         | 0.032         | 0.029         | 0.022         | 0.029         | 0.006        | 0.060         | 0.108         | 0.088         | 0.079         | 0.084         | 0.010        |
| <b>Total PC</b>                | <b>19.102</b> | <b>18.322</b> | <b>18.298</b> | <b>20.794</b> | <b>15.845</b> | <b>18.472</b> | <b>0.798</b> | <b>29.657</b> | <b>27.557</b> | <b>25.252</b> | <b>25.686</b> | <b>27.038</b> | <b>1.006</b> |
| Total Lyso PE                  | 0.494         | 0.450         | 0.461         | 0.313         | 0.281         | 0.400         | 0.043        | 0.612         | 0.568         | 0.417         | 0.354         | 0.488         | 0.061        |
| Total Diacyl PE                | 13.720        | 13.298        | 13.694        | 8.976         | 8.459         | 11.630        | 1.194        | 15.804        | 15.456        | 11.494        | 9.052         | 12.951        | 1.626        |
| Total pPE                      | 13.926        | 13.386        | 13.943        | 9.108         | 8.598         | 11.792        | 1.207        | 17.000        | 16.517        | 12.286        | 9.505         | 13.827        | 1.788        |
| <b>Total PE</b>                | <b>28.140</b> | <b>27.135</b> | <b>28.099</b> | <b>18.398</b> | <b>17.337</b> | <b>23.822</b> | <b>2.443</b> | <b>33.415</b> | <b>32.540</b> | <b>24.197</b> | <b>18.911</b> | <b>27.266</b> | <b>3.474</b> |
| Total Lyso PS                  | 0.044         | 0.051         | 0.035         | 0.031         | 0.030         | 0.038         | 0.004        | 0.096         | 0.056         | 0.033         | 0.038         | 0.056         | 0.014        |
| Total Diacyl PS                | 6.258         | 7.117         | 4.552         | 3.580         | 3.454         | 4.992         | 0.730        | 9.031         | 7.642         | 5.195         | 5.030         | 6.724         | 0.974        |
| Total pPS                      | 0.153         | 0.161         | 0.174         | 0.108         | 0.301         | 0.179         | 0.032        | 0.328         | 0.289         | 0.312         | 0.392         | 0.330         | 0.022        |
| Total ePS                      | 0.003         | 0.004         | 0.006         | 0.003         | 0.006         | 0.004         | 0.001        | 0.005         | 0.004         | 0.005         | 0.006         | 0.005         | 0.001        |
| <b>Total PS</b>                | <b>6.459</b>  | <b>7.332</b>  | <b>4.767</b>  | <b>3.722</b>  | <b>3.791</b>  | <b>5.214</b>  | <b>0.724</b> | <b>9.459</b>  | <b>7.991</b>  | <b>5.544</b>  | <b>5.466</b>  | <b>7.115</b>  | <b>0.977</b> |
| Total Lyso PI                  | 0.060         | 0.062         | 0.070         | 0.053         | 0.047         | 0.058         | 0.004        | 0.094         | 0.089         | 0.077         | 0.050         | 0.078         | 0.010        |
| Total Diacyl PI                | 4.455         | 4.299         | 4.262         | 2.973         | 2.361         | 3.670         | 0.422        | 5.168         | 5.026         | 3.621         | 2.631         | 4.112         | 0.605        |
| Total pPI                      | 0.842         | 0.914         | 0.936         | 0.741         | 0.850         | 0.857         | 0.034        | 1.392         | 1.136         | 1.168         | 0.989         | 1.171         | 0.083        |
| <b>Total PI</b>                | <b>5.357</b>  | <b>5.275</b>  | <b>5.268</b>  | <b>3.767</b>  | <b>3.258</b>  | <b>4.585</b>  | <b>0.446</b> | <b>6.655</b>  | <b>6.251</b>  | <b>4.866</b>  | <b>3.670</b>  | <b>5.360</b>  | <b>0.681</b> |
| Total Lyso PG                  | 0.067         | 0.063         | 0.063         | 0.040         | 0.030         | 0.053         | 0.007        | 0.073         | 0.074         | 0.057         | 0.037         | 0.060         | 0.009        |
| Total Diacyl PG                | 6.021         | 5.950         | 5.993         | 3.873         | 3.802         | 5.128         | 0.527        | 7.674         | 6.926         | 5.292         | 4.242         | 6.033         | 0.777        |
| Total pPG                      | 0.017         | 0.014         | 0.015         | 0.016         | 0.002         | 0.013         | 0.003        | 0.017         | 0.016         | 0.009         | 0.002         | 0.011         | 0.004        |
| <b>Total ALL PG</b>            | <b>6.105</b>  | <b>6.027</b>  | <b>6.071</b>  | <b>3.929</b>  | <b>3.834</b>  | <b>5.193</b>  | <b>0.536</b> | <b>7.764</b>  | <b>7.016</b>  | <b>5.357</b>  | <b>4.281</b>  | <b>6.104</b>  | <b>0.789</b> |
| <b>Total CL</b>                | <b>0.594</b>  | <b>0.755</b>  | <b>0.557</b>  | <b>0.554</b>  | <b>0.508</b>  | <b>0.594</b>  | <b>0.043</b> | <b>1.112</b>  | <b>0.876</b>  | <b>0.933</b>  | <b>0.893</b>  | <b>0.953</b>  | <b>0.054</b> |
| <b>Total PA</b>                | <b>0.506</b>  | <b>0.498</b>  | <b>0.411</b>  | <b>0.326</b>  | <b>0.127</b>  | <b>0.373</b>  | <b>0.070</b> | <b>0.654</b>  | <b>0.544</b>  | <b>0.326</b>  | <b>0.133</b>  | <b>0.414</b>  | <b>0.116</b> |
| <b>TOTAL ALL PHOSPHOLIPIDS</b> | <b>66.263</b> | <b>65.344</b> | <b>63.470</b> | <b>51.490</b> | <b>44.700</b> | <b>58.253</b> | <b>4.308</b> | <b>88.717</b> | <b>82.775</b> | <b>66.474</b> | <b>59.041</b> | <b>74.252</b> | <b>6.915</b> |
| SM                             | 5.081         | 3.923         | 3.813         | 4.290         | 3.227         | 4.067         | 0.306        | 6.579         | 6.546         | 6.207         | 5.817         | 6.287         | 0.178        |
| Cer                            | 1.103         | 1.119         | 1.141         | 0.927         | 1.004         | 1.059         | 0.041        | 1.349         | 1.432         | 1.358         | 1.192         | 1.333         | 0.051        |
| 2-hydroxy Cer                  | 0.006         | 0.002         | 0.012         | 0.007         | 0.005         | 0.007         | 0.002        | 0.001         | 0.004         | 0.004         | 0.003         | 0.003         | 0.001        |
| Hex-Cer                        | 0.063         | 0.057         | 0.057         | 0.057         | 0.048         | 0.056         | 0.002        | 0.067         | 0.067         | 0.059         | 0.071         | 0.066         | 0.003        |
| Lac-Cer                        | N.D.          | 0.002         | 0.002         | 0.002         | 0.004         | 0.003         | 0.000        | 0.010         | 0.010         | 0.009         | 0.006         | 0.009         | 0.001        |
| <b>Total All Sphingolipids</b> | <b>6.253</b>  | <b>5.104</b>  | <b>5.025</b>  | <b>5.283</b>  | <b>4.288</b>  | <b>5.191</b>  | <b>0.315</b> | <b>8.006</b>  | <b>8.058</b>  | <b>7.637</b>  | <b>7.089</b>  | <b>7.698</b>  | <b>0.224</b> |

**Table S4. Main lipid classes and subclasses in *Ldah*-Tg (T) vs. wild-type (WT) peritoneal macrophages treated with oxLDL (50 µg/ml).**  
**Data are presented as normalized ion abundance per microgram of protein.**

| Lipid Category                | WT1           | WT2           | WT3           | WT4           | WT5           | WT6           | AVG           | SEM          | T1            | T2            | T3            | T4            | T5            | T6            | AVG           | SEM          |
|-------------------------------|---------------|---------------|---------------|---------------|---------------|---------------|---------------|--------------|---------------|---------------|---------------|---------------|---------------|---------------|---------------|--------------|
| Total Chol Esters             | 3.007         | 2.998         | 2.584         | 2.834         | 2.609         | 2.343         | 2.729         | 0.107        | 1.850         | 1.874         | 1.850         | 1.864         | 1.890         | 1.728         | 1.843         | 0.024        |
| Chol                          | 1.978         | 1.974         | 1.718         | 1.871         | 1.738         | 1.594         | 1.812         | 0.063        | 1.301         | 1.302         | 1.321         | 1.309         | 1.348         | 1.216         | 1.300         | 0.018        |
| <b>Total Sterols</b>          | <b>4.985</b>  | <b>4.972</b>  | <b>4.303</b>  | <b>4.705</b>  | <b>4.347</b>  | <b>3.937</b>  | <b>4.541</b>  | <b>0.170</b> | <b>3.150</b>  | <b>3.176</b>  | <b>3.172</b>  | <b>3.174</b>  | <b>3.238</b>  | <b>2.945</b>  | <b>3.142</b>  | <b>0.041</b> |
| Total MG                      | 0.003         | 0.003         | 0.002         | 0.003         | 0.002         | 0.002         | 0.002         | 0.000        | 0.001         | 0.001         | 0.002         | 0.001         | 0.002         | 0.001         | 0.001         | 0.000        |
| Total DG                      | 0.182         | 0.181         | 0.159         | 0.167         | 0.155         | 0.153         | 0.166         | 0.005        | 0.115         | 0.119         | 0.115         | 0.115         | 0.113         | 0.103         | 0.113         | 0.002        |
| Total TG                      | 0.651         | 0.612         | 0.531         | 0.568         | 0.528         | 0.517         | 0.568         | 0.022        | 0.480         | 0.447         | 0.451         | 0.454         | 0.466         | 0.431         | 0.455         | 0.007        |
| <b>Total Neutral Lipids</b>   | <b>0.835</b>  | <b>0.795</b>  | <b>0.692</b>  | <b>0.738</b>  | <b>0.684</b>  | <b>0.673</b>  | <b>0.736</b>  | <b>0.027</b> | <b>0.596</b>  | <b>0.568</b>  | <b>0.567</b>  | <b>0.571</b>  | <b>0.581</b>  | <b>0.534</b>  | <b>0.569</b>  | <b>0.008</b> |
| <b>Total NEFA</b>             | <b>0.755</b>  | <b>0.795</b>  | <b>0.643</b>  | <b>0.764</b>  | <b>0.715</b>  | <b>0.578</b>  | <b>0.708</b>  | <b>0.034</b> | <b>0.745</b>  | <b>0.921</b>  | <b>0.802</b>  | <b>0.698</b>  | <b>0.660</b>  | <b>0.605</b>  | <b>0.739</b>  | <b>0.046</b> |
| Total Lyso PC                 | 0.326         | 0.348         | 0.316         | 0.342         | 0.328         | 0.321         | 0.330         | 0.005        | 0.392         | 0.383         | 0.376         | 0.377         | 0.385         | 0.350         | 0.377         | 0.006        |
| Total Diacyl PC               | 23.486        | 24.728        | 21.831        | 23.751        | 21.650        | 21.643        | 22.848        | 0.538        | 24.440        | 23.786        | 23.382        | 23.373        | 23.673        | 21.712        | 23.394        | 0.372        |
| Total ePC                     | 1.969         | 2.041         | 1.824         | 1.957         | 1.819         | 1.849         | 1.910         | 0.038        | 2.220         | 2.128         | 2.089         | 2.087         | 2.117         | 1.943         | 2.098         | 0.037        |
| Total Ox-PC                   | 0.001         | 0.001         | 0.000         | N.D.          | 0.001         | 0.001         | 0.001         | 0.000        | 0.001         | 0.001         | 0.001         | N.D.          | 0.001         | 0.001         | 0.001         | 0.000        |
| <b>Total PC</b>               | <b>25.783</b> | <b>27.118</b> | <b>23.972</b> | <b>26.050</b> | <b>23.798</b> | <b>23.813</b> | <b>25.089</b> | <b>0.579</b> | <b>27.054</b> | <b>26.298</b> | <b>25.849</b> | <b>25.837</b> | <b>26.175</b> | <b>24.005</b> | <b>25.870</b> | <b>0.415</b> |
| Total Lyso PE                 | 0.227         | 0.252         | 0.206         | 0.241         | 0.197         | 0.197         | 0.220         | 0.010        | 0.316         | 0.305         | 0.295         | 0.270         | 0.277         | 0.272         | 0.290         | 0.008        |
| Total Diacyl PE               | 6.979         | 7.363         | 6.611         | 6.920         | 6.537         | 6.308         | 6.786         | 0.154        | 7.403         | 7.303         | 7.177         | 7.211         | 7.323         | 6.745         | 7.194         | 0.096        |
| Total pPE                     | 6.351         | 6.707         | 5.996         | 6.336         | 5.882         | 5.771         | 6.174         | 0.144        | 6.859         | 6.890         | 6.756         | 6.791         | 6.910         | 6.359         | 6.761         | 0.084        |
| <b>Total PE</b>               | <b>13.557</b> | <b>14.322</b> | <b>12.813</b> | <b>13.497</b> | <b>12.616</b> | <b>12.277</b> | <b>13.180</b> | <b>0.306</b> | <b>14.578</b> | <b>14.499</b> | <b>14.228</b> | <b>14.272</b> | <b>14.510</b> | <b>13.377</b> | <b>14.244</b> | <b>0.183</b> |
| Total Lyso PS                 | 0.030         | 0.033         | 0.026         | 0.031         | 0.023         | 0.025         | 0.028         | 0.002        | 0.053         | 0.047         | 0.045         | 0.042         | 0.042         | 0.042         | 0.045         | 0.002        |
| Total Diacyl PS               | 5.079         | 5.377         | 4.741         | 5.063         | 4.705         | 4.540         | 4.917         | 0.126        | 5.324         | 5.229         | 5.071         | 5.188         | 5.308         | 4.898         | 5.170         | 0.066        |
| Total pPS                     | 0.877         | 0.923         | 0.825         | 0.867         | 0.826         | 0.771         | 0.848         | 0.021        | 0.756         | 0.723         | 0.728         | 0.776         | 0.822         | 0.785         | 0.765         | 0.015        |
| Total ePS                     | 0.004         | 0.005         | 0.005         | 0.005         | 0.005         | 0.005         | 0.005         | 0.000        | 0.006         | 0.004         | 0.004         | 0.005         | 0.004         | 0.003         | 0.005         | 0.000        |
| <b>Total ALL PS</b>           | <b>5.990</b>  | <b>6.337</b>  | <b>5.597</b>  | <b>5.967</b>  | <b>5.558</b>  | <b>5.341</b>  | <b>5.798</b>  | <b>0.149</b> | <b>6.139</b>  | <b>6.003</b>  | <b>5.848</b>  | <b>6.011</b>  | <b>6.176</b>  | <b>5.728</b>  | <b>5.984</b>  | <b>0.070</b> |
| Total Lyso PI                 | 0.024         | 0.026         | 0.022         | 0.026         | 0.019         | 0.022         | 0.023         | 0.001        | 0.049         | 0.048         | 0.045         | 0.042         | 0.045         | 0.043         | 0.045         | 0.001        |
| Total Diacyl PI               | 1.578         | 1.689         | 1.415         | 1.606         | 1.407         | 1.392         | 1.514         | 0.051        | 1.897         | 1.894         | 1.781         | 1.821         | 1.833         | 1.708         | 1.822         | 0.029        |
| <b>Total ALL PI</b>           | <b>1.602</b>  | <b>1.715</b>  | <b>1.437</b>  | <b>1.632</b>  | <b>1.426</b>  | <b>1.413</b>  | <b>1.538</b>  | <b>0.053</b> | <b>1.947</b>  | <b>1.942</b>  | <b>1.826</b>  | <b>1.863</b>  | <b>1.877</b>  | <b>1.751</b>  | <b>1.867</b>  | <b>0.030</b> |
| Total Lyso PG                 | 0.037         | 0.040         | 0.034         | 0.037         | 0.032         | 0.030         | 0.035         | 0.001        | 0.044         | 0.044         | 0.043         | 0.040         | 0.043         | 0.043         | 0.043         | 0.001        |
| Total Diacyl PG               | 1.902         | 2.041         | 1.816         | 1.892         | 1.792         | 1.717         | 1.860         | 0.046        | 2.179         | 2.145         | 2.113         | 2.116         | 2.180         | 2.022         | 2.126         | 0.024        |
| <b>Total ALL PG</b>           | <b>1.939</b>  | <b>2.081</b>  | <b>1.849</b>  | <b>1.929</b>  | <b>1.824</b>  | <b>1.748</b>  | <b>1.895</b>  | <b>0.047</b> | <b>2.223</b>  | <b>2.189</b>  | <b>2.156</b>  | <b>2.156</b>  | <b>2.223</b>  | <b>2.065</b>  | <b>2.169</b>  | <b>0.024</b> |
| <b>Total CL</b>               | <b>0.070</b>  | <b>0.093</b>  | <b>0.077</b>  | <b>0.082</b>  | <b>0.075</b>  | <b>0.087</b>  | <b>0.081</b>  | <b>0.003</b> | <b>0.076</b>  | <b>0.058</b>  | <b>0.058</b>  | <b>0.059</b>  | <b>0.058</b>  | <b>0.053</b>  | <b>0.060</b>  | <b>0.003</b> |
| <b>Total PA</b>               | <b>0.014</b>  | <b>0.014</b>  | <b>0.013</b>  | <b>0.014</b>  | <b>0.012</b>  | <b>0.012</b>  | <b>0.013</b>  | <b>0.000</b> | <b>0.037</b>  | <b>0.032</b>  | <b>0.026</b>  | <b>0.028</b>  | <b>0.023</b>  | <b>0.021</b>  | <b>0.028</b>  | <b>0.002</b> |
| <b>Total All Phospholipi</b>  | <b>47.354</b> | <b>49.966</b> | <b>44.321</b> | <b>47.539</b> | <b>43.883</b> | <b>43.277</b> | <b>46.057</b> | <b>1.074</b> | <b>50.108</b> | <b>49.079</b> | <b>48.165</b> | <b>48.362</b> | <b>49.166</b> | <b>45.249</b> | <b>48.355</b> | <b>0.682</b> |
| SM                            | 4.654         | 5.172         | 4.497         | 5.014         | 4.485         | 4.335         | 4.693         | 0.135        | 4.926         | 4.974         | 4.910         | 4.823         | 4.898         | 4.431         | 4.827         | 0.082        |
| Cer                           | 1.103         | 1.119         | 1.123         | 0.927         | 1.004         | 1.004         | 1.047         | 0.033        | 1.349         | 1.432         | 1.209         | 1.358         | 1.192         | 1.192         | 1.289         | 0.043        |
| 2-hydroxy Cer                 | 0.006         | 0.002         | 0.012         | 0.007         | 0.005         | 0.005         | 0.006         | 0.001        | 0.001         | 0.004         | 0.004         | 0.004         | 0.003         | 0.003         | 0.003         | 0.000        |
| Hex-Cer                       | 0.018         | 0.023         | 0.020         | 0.025         | 0.019         | 0.023         | 0.021         | 0.001        | 0.027         | 0.030         | 0.028         | 0.027         | 0.026         | 0.023         | 0.027         | 0.001        |
| Lac-Cer                       | 0.005         | 0.006         | 0.005         | 0.005         | 0.005         | 0.004         | 0.005         | 0.000        | 0.005         | 0.005         | 0.006         | 0.005         | 0.007         | 0.005         | 0.005         | 0.000        |
| <b>Total All Sphingolipic</b> | <b>5.786</b>  | <b>6.322</b>  | <b>5.657</b>  | <b>5.977</b>  | <b>5.518</b>  | <b>5.371</b>  | <b>5.772</b>  | <b>0.139</b> | <b>6.308</b>  | <b>6.446</b>  | <b>6.156</b>  | <b>6.216</b>  | <b>6.125</b>  | <b>5.655</b>  | <b>6.151</b>  | <b>0.110</b> |

**Table S5. Genes significantly regulated at and adjusted p-value (q-value)<0.05 in *Ldah*-Tg PM treated with oxLDL.**

Data were analyzed using the Wald test (two-tailed) followed by the Benjamini–Hochberg test to estimate the false discovery rate adjusted p-value (q\_value).

| gene_id                | gene synonym  | log2_fold change_Tg/WT | p_value | q_value    |
|------------------------|---------------|------------------------|---------|------------|
| ENSMUSG00000037669.14  | Ldah          | 2.12724                | 0.00005 | 0.00258735 |
| ENSMUSG00000087445.1   | Gm14286       | 1.79927                | 0.0024  | 0.0394646  |
| ENSMUSG00000036928.14  | Stag3         | 1.68916                | 0.0017  | 0.0314636  |
| ENSMUSG00000021268.17  | Meg3          | 1.59044                | 0.0007  | 0.0179285  |
| ENSMUSG00000026955.13  | Sapcd2        | 1.54334                | 0.0032  | 0.0475054  |
| ENSMUSG00000095040.2   | 1700001J03Rik | 1.53904                | 0.00315 | 0.0472053  |
| ENSMUSG00000028139.5   | Riad1         | 1.37459                | 0.0003  | 0.0100619  |
| ENSMUSG00000070891.2   | Gm12689       | 1.37459                | 0.00005 | 0.00258735 |
| ENSMUSG00000019737.14  | Syne4         | 1.37174                | 0.00045 | 0.0132986  |
| ENSMUSG000000105008.1  | Gm43652       | 1.32592                | 0.00005 | 0.00258735 |
| ENSMUSG00000031098.18  | Syt8          | 1.23291                | 0.001   | 0.0226798  |
| ENSMUSG00000046295.13  | Ankle1        | 1.21904                | 0.00285 | 0.0440101  |
| ENSMUSG00000045903.8   | Npas4         | 1.20938                | 0.00005 | 0.00258735 |
| ENSMUSG00000009145.6   | Dqx1          | 1.18532                | 0.00005 | 0.00258735 |
| ENSMUSG00000073418.4   | C4b           | 1.17038                | 0.003   | 0.0455497  |
| ENSMUSG00000027314.6   | Dll4          | 1.1588                 | 0.0015  | 0.0293926  |
| ENSMUSG00000053964.17  | Lgals4        | 1.09883                | 0.00005 | 0.00258735 |
| ENSMUSG000000103115.1  | Gm37584       | 1.09089                | 0.0025  | 0.0405307  |
| ENSMUSG00000048856.8   | Slc25a47      | 1.07317                | 0.00155 | 0.0298193  |
| ENSMUSG00000097534.3   | Gm16675       | 1.05249                | 0.0008  | 0.0195422  |
| ENSMUSG00000021815.3   | Mss51         | 0.996082               | 0.0009  | 0.0212086  |
| ENSMUSG000000106547.1  | B230303O12Rik | 0.988964               | 0.00005 | 0.00258735 |
| ENSMUSG000000080316.10 | Spaca6        | 0.988892               | 0.0026  | 0.0414106  |
| ENSMUSG00000074415.10  | 2610203C20Rik | 0.982298               | 0.00005 | 0.00258735 |
| ENSMUSG00000031861.15  | Lpar2         | 0.965364               | 0.00005 | 0.00258735 |
| ENSMUSG00000028845.15  | Tekt2         | 0.965203               | 0.00095 | 0.0220588  |
| ENSMUSG00000023993.6   | Trem1         | 0.926654               | 0.00005 | 0.00258735 |
| ENSMUSG00000048329.7   | Mfsd6l        | 0.922582               | 0.0031  | 0.0466214  |
| ENSMUSG00000099398.1   | Ms4a14        | 0.914776               | 0.00005 | 0.00258735 |
| ENSMUSG00000033763.14  | Mtss1l        | 0.909037               | 0.0008  | 0.0195422  |
| ENSMUSG00000074899.4   | Sptbn5        | 0.900573               | 0.00005 | 0.00258735 |
| ENSMUSG00000000386.14  | Mx1           | 0.89838                | 0.0026  | 0.0414106  |
| ENSMUSG000000097451.9  | Rian          | 0.898293               | 0.00185 | 0.0333632  |
| ENSMUSG00000096768.7   | Erdr1         | 0.896468               | 0.00005 | 0.00258735 |
| ENSMUSG00000022489.5   | Pde1b         | 0.873649               | 0.00005 | 0.00258735 |
| ENSMUSG00000011154.17  | Cfap161       | 0.852316               | 0.0001  | 0.00449574 |
| ENSMUSG00000066975.12  | Cryba4        | 0.848567               | 0.00205 | 0.0356026  |
| ENSMUSG00000023473.11  | Celsr3        | 0.841332               | 0.00075 | 0.0188287  |
| ENSMUSG00000032690.16  | Oas2          | 0.838816               | 0.0001  | 0.00449574 |
| ENSMUSG00000015377.9   | Dennd6b       | 0.837011               | 0.00005 | 0.00258735 |
| ENSMUSG00000049676.14  | Catsperg1     | 0.829967               | 0.0029  | 0.0445111  |
| ENSMUSG00000031380.10  | Figf          | 0.829391               | 0.00255 | 0.0411309  |
| ENSMUSG00000023912.9   | Slc25a27      | 0.825252               | 0.00205 | 0.0356026  |
| ENSMUSG000000109819.1  | RP24-1519.3   | 0.824107               | 0.0021  | 0.0362229  |
| ENSMUSG00000054135.2   | A430110L20Rik | 0.815496               | 0.00005 | 0.00258735 |
| ENSMUSG00000027318.17  | Adam33        | 0.806218               | 0.00005 | 0.00258735 |
| ENSMUSG00000002100.15  | Mybpc3        | 0.801451               | 0.00095 | 0.0220588  |
| ENSMUSG00000085028.2   | Slc2a4rg-ps   | 0.795623               | 0.00005 | 0.00258735 |
| ENSMUSG000000104943.1  | Gm42868       | 0.781145               | 0.001   | 0.0226798  |
| ENSMUSG000000103839.1  | Gm37607       | 0.777302               | 0.00025 | 0.00905571 |
| ENSMUSG00000045838.8   | A430105I19Rik | 0.770408               | 0.00035 | 0.011149   |
| ENSMUSG00000023795.16  | Pisd-ps2      | 0.763527               | 0.0016  | 0.0303665  |
| ENSMUSG00000097180.5   | 2700038G22Rik | 0.761977               | 0.0001  | 0.00449574 |
| ENSMUSG000000092274.2  | Neat1         | 0.749748               | 0.00005 | 0.00258735 |
| ENSMUSG00000047909.11  | Ankrd16       | 0.748925               | 0.00005 | 0.00258735 |
| ENSMUSG00000051550.10  | Zfp579        | 0.746894               | 0.00005 | 0.00258735 |
| ENSMUSG00000001506.10  | Col1a1        | 0.745774               | 0.00005 | 0.00258735 |
| ENSMUSG00000043833.6   | 2900005J15Rik | 0.745078               | 0.00035 | 0.011149   |
| ENSMUSG000000092341.2  | Malat1        | 0.743202               | 0.00095 | 0.0220588  |
| ENSMUSG00000035299.16  | Mid1          | 0.726302               | 0.0013  | 0.0271076  |
| ENSMUSG00000000753.15  | Serpinf1      | 0.722779               | 0.00345 | 0.0498167  |
| ENSMUSG00000021495.8   | Fam193b       | 0.712792               | 0.00005 | 0.00258735 |
| ENSMUSG00000029720.9   | Gm20605       | 0.711353               | 0.00095 | 0.0220588  |

|                       |               |          |         |            |
|-----------------------|---------------|----------|---------|------------|
| ENSMUSG00000096960.1  | A230028O05Rik | 0.704329 | 0.00005 | 0.00258735 |
| ENSMUSG00000032607.12 | Amt           | 0.702864 | 0.002   | 0.035364   |
| ENSMUSG000000103983.1 | Gm20045       | 0.683563 | 0.00005 | 0.00258735 |
| ENSMUSG00000045282.7  | Tmem86b       | 0.680165 | 0.00185 | 0.0333632  |
| ENSMUSG00000027239.14 | Mdk           | 0.680099 | 0.00005 | 0.00258735 |
| ENSMUSG000000106383.1 | E330034L11Rik | 0.679915 | 0.00005 | 0.00258735 |
| ENSMUSG00000004187.10 | Kifc2         | 0.667393 | 0.00005 | 0.00258735 |
| ENSMUSG00000074867.3  | Zfp808        | 0.646855 | 0.00005 | 0.00258735 |
| ENSMUSG00000091144.2  | Phf11c        | 0.64659  | 0.002   | 0.00775413 |
| ENSMUSG00000036856.4  | Wnt4          | 0.642024 | 0.00005 | 0.00258735 |
| ENSMUSG00000018651.14 | Tada2a        | 0.64063  | 0.0003  | 0.0100619  |
| ENSMUSG00000097296.1  | Gm26532       | 0.639555 | 0.00005 | 0.00258735 |
| ENSMUSG00000020474.11 | Polm          | 0.637051 | 0.00005 | 0.00258735 |
| ENSMUSG00000023007.15 | Prpf40b       | 0.637045 | 0.0002  | 0.00775413 |
| ENSMUSG000000101609.1 | Kcnq1ot1      | 0.624514 | 0.00005 | 0.00258735 |
| ENSMUSG00000078485.2  | Plekhn1       | 0.624133 | 0.00005 | 0.00258735 |
| ENSMUSG000000103857.1 | Gm37249       | 0.620179 | 0.0024  | 0.0394646  |
| ENSMUSG00000014786.7  | Slc9a5        | 0.614053 | 0.0015  | 0.0293926  |
| ENSMUSG00000096780.7  | Tmem181b-ps   | 0.612651 | 0.00005 | 0.00258735 |
| ENSMUSG00000067203.7  | H2-K2         | 0.611205 | 0.00005 | 0.00258735 |
| ENSMUSG00000022070.6  | Bora          | 0.606144 | 0.00005 | 0.00258735 |
| ENSMUSG00000042625.16 | Safb2         | 0.604502 | 0.00025 | 0.00905571 |
| ENSMUSG00000038884.14 | A230050P20Rik | 0.60378  | 0.00005 | 0.00258735 |
| ENSMUSG00000096929.7  | A330023F24Rik | 0.603728 | 0.00005 | 0.00258735 |
| ENSMUSG00000060224.3  | Pyroxd2       | 0.60271  | 0.00005 | 0.00258735 |
| ENSMUSG00000035967.15 | Ddx26b        | 0.601304 | 0.0008  | 0.0195422  |
| ENSMUSG00000027522.15 | Stx16         | 0.601015 | 0.00005 | 0.00258735 |
| ENSMUSG00000025507.13 | Pidd1         | 0.596642 | 0.00285 | 0.0440101  |
| ENSMUSG00000086859.3  | Snhg20        | 0.59441  | 0.00015 | 0.00627624 |
| ENSMUSG00000045065.7  | 9930022D16Rik | 0.594076 | 0.00105 | 0.0236027  |
| ENSMUSG00000028028.11 | Alpk1         | 0.592549 | 0.00005 | 0.00258735 |
| ENSMUSG00000033705.16 | Stard9        | 0.590706 | 0.0005  | 0.0142449  |
| ENSMUSG00000035545.13 | Leng8         | 0.587812 | 0.00005 | 0.00258735 |
| ENSMUSG00000071203.6  | Naip5         | 0.587525 | 0.00005 | 0.00258735 |
| ENSMUSG00000046808.17 | Atp10d        | 0.583471 | 0.0001  | 0.00449574 |
| ENSMUSG00000044244.18 | Il2orb        | 0.580198 | 0.00075 | 0.0188287  |
| ENSMUSG00000040663.8  | Clcf1         | 0.579513 | 0.00005 | 0.00258735 |
| ENSMUSG00000055897.13 | Ppp4r1l-ps    | 0.579398 | 0.0008  | 0.0195422  |
| ENSMUSG00000097823.2  | Gm16701       | 0.57861  | 0.00325 | 0.047911   |
| ENSMUSG00000051790.15 | Nlgn2         | 0.57853  | 0.00095 | 0.0220588  |
| ENSMUSG00000073609.9  | D2hgdh        | 0.57739  | 0.0006  | 0.0160143  |
| ENSMUSG00000054737.11 | Zfp182        | 0.577255 | 0.00005 | 0.00258735 |
| ENSMUSG00000097313.1  | Gm26569       | 0.57654  | 0.00005 | 0.00258735 |
| ENSMUSG00000042138.7  | Msantd2       | 0.576127 | 0.00005 | 0.00258735 |
| ENSMUSG00000097636.7  | Mirt1         | 0.575583 | 0.0014  | 0.0281287  |
| ENSMUSG00000012017.3  | Scarf2        | 0.571549 | 0.00135 | 0.0276053  |
| ENSMUSG00000086825.1  | Gm15675       | 0.571368 | 0.00055 | 0.0152247  |
| ENSMUSG00000082286.10 | Pisd-ps1      | 0.570852 | 0.00005 | 0.00258735 |
| ENSMUSG00000048537.15 | Phldb1        | 0.570324 | 0.00085 | 0.0203711  |
| ENSMUSG00000083161.1  | Gm11427       | 0.566701 | 0.00005 | 0.00258735 |
| ENSMUSG000000103520.1 | 1110025M09Rik | 0.565141 | 0.00145 | 0.0286788  |
| ENSMUSG00000035649.17 | Zcchc7        | 0.56381  | 0.0001  | 0.00449574 |
| ENSMUSG00000008200.14 | Fnbp4         | 0.559785 | 0.0003  | 0.0100619  |
| ENSMUSG00000098055.1  | Gm26947       | 0.557145 | 0.00295 | 0.0450604  |
| ENSMUSG00000049670.8  | Morn4         | 0.554542 | 0.00175 | 0.0321078  |
| ENSMUSG00000037965.14 | Zc3h7a        | 0.55448  | 0.00025 | 0.00905571 |
| ENSMUSG00000032198.8  | Dock6         | 0.552541 | 0.0002  | 0.00775413 |
| ENSMUSG00000037443.13 | Cep85         | 0.547203 | 0.0006  | 0.0160143  |
| ENSMUSG00000085741.8  | 5430405H02Rik | 0.544048 | 0.0006  | 0.0160143  |
| ENSMUSG00000069727.5  | Gm5595        | 0.542098 | 0.0001  | 0.00449574 |
| ENSMUSG00000022974.12 | Paxbp1        | 0.541803 | 0.00225 | 0.038034   |
| ENSMUSG000000101462.2 | Gm3052        | 0.541342 | 0.0028  | 0.0435563  |
| ENSMUSG00000029490.3  | Mfsd7a        | 0.540035 | 0.00005 | 0.00258735 |
| ENSMUSG00000024174.8  | Pot1b         | 0.539685 | 0.00005 | 0.00258735 |
| ENSMUSG00000034800.15 | Zfp661        | 0.535567 | 0.00005 | 0.00258735 |
| ENSMUSG00000097415.2  | AU020206      | 0.532874 | 0.00005 | 0.00258735 |

|                        |               |          |         |            |
|------------------------|---------------|----------|---------|------------|
| ENSMUSG00000056592.14  | Zfp658        | 0.531401 | 0.00005 | 0.00258735 |
| ENSMUSG00000099481.6   | Xndc1         | 0.531148 | 0.00035 | 0.011149   |
| ENSMUSG00000037266.18  | Rsrp1         | 0.521973 | 0.0003  | 0.0100619  |
| ENSMUSG00000029524.16  | Sirt4         | 0.520928 | 0.0016  | 0.0303665  |
| ENSMUSG00000032621.8   | Srek1         | 0.51891  | 0.0008  | 0.0195422  |
| ENSMUSG00000030279.15  | C2cd5         | 0.516531 | 0.0002  | 0.00775413 |
| ENSMUSG00000026875.14  | Traf1         | 0.511764 | 0.00105 | 0.0236027  |
| ENSMUSG00000028464.16  | Tpm2          | 0.511366 | 0.0027  | 0.04226    |
| ENSMUSG00000042249.11  | Adrbk2        | 0.509783 | 0.00005 | 0.00258735 |
| ENSMUSG00000054051.6   | Ercc6         | 0.509197 | 0.00005 | 0.00258735 |
| ENSMUSG00000014158.11  | Trpv4         | 0.508717 | 0.00005 | 0.00258735 |
| ENSMUSG00000068394.4   | Cep152        | 0.507763 | 0.00005 | 0.00258735 |
| ENSMUSG00000037243.17  | Zfp692        | 0.507123 | 0.00005 | 0.00258735 |
| ENSMUSG00000032177.16  | Pde4a         | 0.50623  | 0.0003  | 0.0100619  |
| ENSMUSG00000024830.16  | Rps6kb2       | 0.505946 | 0.00005 | 0.00258735 |
| ENSMUSG00000093765.7   | Gm20658       | 0.502857 | 0.00005 | 0.00258735 |
| ENSMUSG00000053483.13  | Usp21         | 0.500353 | 0.00055 | 0.0152247  |
| ENSMUSG00000007850.16  | Hnrnp1        | 0.499387 | 0.0003  | 0.0100619  |
| ENSMUSG00000041354.15  | Rgl2          | 0.498781 | 0.0002  | 0.00775413 |
| ENSMUSG00000030432.12  | Rpl28         | 0.492727 | 0.0008  | 0.0195422  |
| ENSMUSG00000005682.8   | Pan2          | 0.491977 | 0.00005 | 0.00258735 |
| ENSMUSG00000024299.16  | Adamts10      | 0.491331 | 0.00265 | 0.0418911  |
| ENSMUSG00000029027.8   | Dffb          | 0.491116 | 0.0029  | 0.0445111  |
| ENSMUSG00000004267.16  | Eno2          | 0.490393 | 0.00005 | 0.00258735 |
| ENSMUSG000000083563.1  | Gm13340       | 0.489016 | 0.00005 | 0.00258735 |
| ENSMUSG000000050737.13 | Ptges         | 0.488789 | 0.00285 | 0.0440101  |
| ENSMUSG00000066640.11  | Fbxl18        | 0.487948 | 0.0017  | 0.0314636  |
| ENSMUSG00000059851.15  | Suv420h2      | 0.487889 | 0.00025 | 0.00905571 |
| ENSMUSG00000066861.14  | Oas1g         | 0.486918 | 0.0016  | 0.0303665  |
| ENSMUSG00000052415.5   | Tchh          | 0.486191 | 0.003   | 0.0455497  |
| ENSMUSG00000029823.16  | Luc7l2        | 0.485365 | 0.00005 | 0.00258735 |
| ENSMUSG00000045466.18  | Zfp956        | 0.48265  | 0.00035 | 0.011149   |
| ENSMUSG00000035759.3   | Bbs10         | 0.482107 | 0.00005 | 0.00258735 |
| ENSMUSG00000035713.15  | Usp35         | 0.480921 | 0.00205 | 0.0356026  |
| ENSMUSG00000070390.12  | Nlrp1b        | 0.479022 | 0.0002  | 0.00775413 |
| ENSMUSG00000021910.15  | Nisch         | 0.476426 | 0.0004  | 0.0121904  |
| ENSMUSG00000055436.18  | Srsf11        | 0.473021 | 0.00005 | 0.00258735 |
| ENSMUSG00000031389.17  | Arhgap4       | 0.471822 | 0.00055 | 0.0152247  |
| ENSMUSG00000010608.15  | Rbm25         | 0.470201 | 0.00165 | 0.0308991  |
| ENSMUSG00000074158.9   | 9830147E19Rik | 0.469309 | 0.00025 | 0.00905571 |
| ENSMUSG000000102813.1  | Gm37795       | 0.469109 | 0.0001  | 0.00449574 |
| ENSMUSG00000061028.7   | Clasrp        | 0.468529 | 0.00065 | 0.0170615  |
| ENSMUSG00000044813.15  | Shb           | 0.467815 | 0.00225 | 0.038034   |
| ENSMUSG00000046402.10  | Rbp1          | 0.465523 | 0.00155 | 0.0298193  |
| ENSMUSG00000036893.17  | Ehmt1         | 0.465452 | 0.0027  | 0.04226    |
| ENSMUSG00000030815.11  | Phkg2         | 0.465267 | 0.00015 | 0.00627624 |
| ENSMUSG00000058402.14  | Zfp420        | 0.464812 | 0.0007  | 0.0179285  |
| ENSMUSG00000055866.9   | Per2          | 0.464561 | 0.00335 | 0.0488738  |
| ENSMUSG00000059708.12  | Akap17b       | 0.462488 | 0.0008  | 0.0195422  |
| ENSMUSG00000037989.15  | Wnk2          | 0.46211  | 0.0006  | 0.0160143  |
| ENSMUSG00000029071.16  | Dvl1          | 0.460179 | 0.00005 | 0.00258735 |
| ENSMUSG00000095123.1   | Gm21781       | 0.458661 | 0.0001  | 0.00449574 |
| ENSMUSG00000011158.7   | Brf1          | 0.457699 | 0.00005 | 0.00258735 |
| ENSMUSG00000033434.15  | Gtpbp6        | 0.455008 | 0.00185 | 0.0333632  |
| ENSMUSG00000004561.14  | Mettl17       | 0.454492 | 0.00145 | 0.0286788  |
| ENSMUSG00000059939.13  | 9430015G10Rik | 0.453997 | 0.00205 | 0.0356026  |
| ENSMUSG00000072915.3   | Gm12258       | 0.453352 | 0.00075 | 0.0188287  |
| ENSMUSG00000024451.8   | Arap3         | 0.449736 | 0.00345 | 0.0498167  |
| ENSMUSG00000002910.10  | Arrdc2        | 0.445131 | 0.00005 | 0.00258735 |
| ENSMUSG00000095440.1   | Figl2         | 0.444996 | 0.00005 | 0.00258735 |
| ENSMUSG00000089726.2   | Mir17hg       | 0.444745 | 0.0001  | 0.00449574 |
| ENSMUSG00000020451.17  | Limk2         | 0.443228 | 0.0014  | 0.0281287  |
| ENSMUSG00000038831.16  | Ralgs1        | 0.442767 | 0.00155 | 0.0298193  |
| ENSMUSG00000034248.7   | Slc25a37      | 0.441384 | 0.00005 | 0.00258735 |
| ENSMUSG00000035597.18  | Prpf39        | 0.441359 | 0.00015 | 0.00627624 |
| ENSMUSG00000025145.13  | Lrrc45        | 0.441074 | 0.0004  | 0.0121904  |

|                        |               |          |         |            |
|------------------------|---------------|----------|---------|------------|
| ENSMUSG00000029581.14  | Fscn1         | 0.440778 | 0.00285 | 0.0440101  |
| ENSMUSG00000044250.7   | Pced1b        | 0.440646 | 0.00035 | 0.011149   |
| ENSMUSG00000020156.16  | Mum1          | 0.438181 | 0.00005 | 0.00258735 |
| ENSMUSG00000002668.7   | Dennd1c       | 0.437753 | 0.00005 | 0.00258735 |
| ENSMUSG000000061589.14 | Dot1l         | 0.435685 | 0.00005 | 0.00258735 |
| ENSMUSG00000009741.14  | Ubp1          | 0.433344 | 0.00005 | 0.00258735 |
| ENSMUSG00000029060.17  | Mib2          | 0.430117 | 0.00105 | 0.0236027  |
| ENSMUSG00000006395.16  | Hyi           | 0.429045 | 0.0005  | 0.0142449  |
| ENSMUSG000000062822.7  | 4833420G17Rik | 0.42756  | 0.00005 | 0.00258735 |
| ENSMUSG000000015291.10 | Gdi1          | 0.427125 | 0.00085 | 0.0203711  |
| ENSMUSG00000070808.4   | Gltscr1       | 0.427068 | 0.00005 | 0.00258735 |
| ENSMUSG00000019763.11  | Rmnd1         | 0.426601 | 0.00145 | 0.0286788  |
| ENSMUSG00000078484.3   | Klhl17        | 0.426501 | 0.0002  | 0.00775413 |
| ENSMUSG00000002409.18  | Dyrk1b        | 0.426141 | 0.0003  | 0.0100619  |
| ENSMUSG000000037475.15 | Thoc2         | 0.423424 | 0.0002  | 0.00775413 |
| ENSMUSG00000028327.14  | Stra6l        | 0.422783 | 0.00005 | 0.00258735 |
| ENSMUSG00000036931.14  | Nfkbid        | 0.421479 | 0.00005 | 0.00258735 |
| ENSMUSG000000022617.14 | Chkb          | 0.421004 | 0.00005 | 0.00258735 |
| ENSMUSG000000031166.13 | Wdr13         | 0.420997 | 0.00135 | 0.0276053  |
| ENSMUSG000000091811.2  | Inafm1        | 0.420991 | 0.0004  | 0.0121904  |
| ENSMUSG000000021327.18 | Zkscan3       | 0.419777 | 0.00005 | 0.00258735 |
| ENSMUSG000000039199.5  | Zdhhc1        | 0.418494 | 0.0001  | 0.00449574 |
| ENSMUSG000000025137.15 | Pcvt2         | 0.416582 | 0.00065 | 0.0170615  |
| ENSMUSG000000061898.10 | Rbak          | 0.414295 | 0.00055 | 0.0152247  |
| ENSMUSG000000029022.18 | Miip          | 0.41385  | 0.00015 | 0.00627624 |
| ENSMUSG000000023952.13 | Gtpbp2        | 0.41292  | 0.00265 | 0.0418911  |
| ENSMUSG000000032013.5  | Trim29        | 0.412118 | 0.00005 | 0.00258735 |
| ENSMUSG000000052512.17 | Nav2          | 0.409736 | 0.0005  | 0.0142449  |
| ENSMUSG000000049295.16 | Zfp219        | 0.407324 | 0.00005 | 0.00258735 |
| ENSMUSG00000013236.16  | Ptprs         | 0.406992 | 0.00005 | 0.00258735 |
| ENSMUSG000000022228.13 | Zscan26       | 0.406506 | 0.00005 | 0.00258735 |
| ENSMUSG000000020385.16 | Clk4          | 0.406036 | 0.00055 | 0.0152247  |
| ENSMUSG000000041235.11 | Chd7          | 0.404886 | 0.0018  | 0.0328824  |
| ENSMUSG000000039759.10 | Thap3         | 0.404502 | 0.0015  | 0.0293926  |
| ENSMUSG000000063511.11 | Snrnp70       | 0.404319 | 0.0003  | 0.0100619  |
| ENSMUSG000000020902.12 | Ntn1          | 0.404148 | 0.00065 | 0.0170615  |
| ENSMUSG000000045409.16 | Trim39        | 0.40342  | 0.00005 | 0.00258735 |
| ENSMUSG000000058761.5  | Rnf169        | 0.401999 | 0.0001  | 0.00449574 |
| ENSMUSG000000026630.9  | Batf3         | 0.401924 | 0.0027  | 0.04226    |
| ENSMUSG000000052563.13 | D930048N14Rik | 0.401241 | 0.0003  | 0.0100619  |
| ENSMUSG000000036948.17 | BC037034      | 0.401095 | 0.0003  | 0.0100619  |
| ENSMUSG000000000204.15 | Slfn4         | 0.397493 | 0.00155 | 0.0298193  |
| ENSMUSG000000020770.13 | Unk           | 0.397133 | 0.00165 | 0.0308991  |
| ENSMUSG000000078942.10 | Naip6         | 0.396315 | 0.00005 | 0.00258735 |
| ENSMUSG000000022185.18 | Acin1         | 0.395279 | 0.00255 | 0.0411309  |
| ENSMUSG000000047617.11 | BC029214      | 0.395134 | 0.00285 | 0.0440101  |
| ENSMUSG000000001248.14 | Gramd1a       | 0.393648 | 0.00005 | 0.00258735 |
| ENSMUSG000000031295.13 | Phka2         | 0.393297 | 0.00005 | 0.00258735 |
| ENSMUSG000000025377.14 | Enthd2        | 0.392105 | 0.00195 | 0.0348199  |
| ENSMUSG000000040943.12 | Tet2          | 0.392027 | 0.0001  | 0.00449574 |
| ENSMUSG000000001173.15 | Ocr1          | 0.391173 | 0.0002  | 0.00775413 |
| ENSMUSG000000045639.14 | Zfp629        | 0.390758 | 0.00075 | 0.0188287  |
| ENSMUSG000000033819.15 | Ppp1r16a      | 0.390599 | 0.00045 | 0.0132986  |
| ENSMUSG000000075600.2  | Zc3h3         | 0.390223 | 0.00065 | 0.0170615  |
| ENSMUSG000000054648.7  | Zfp869        | 0.389906 | 0.0013  | 0.0271076  |
| ENSMUSG000000029068.16 | Ccnl2         | 0.389895 | 0.00005 | 0.00258735 |
| ENSMUSG000000054199.16 | Gon4l         | 0.389149 | 0.0006  | 0.0160143  |
| ENSMUSG000000045411.16 | 2410002F23Rik | 0.388591 | 0.00075 | 0.0188287  |
| ENSMUSG000000044037.15 | Als2cl        | 0.388532 | 0.00125 | 0.0265008  |
| ENSMUSG000000063952.15 | Brpf3         | 0.386176 | 0.0027  | 0.04226    |
| ENSMUSG000000085156.7  | Snhg15        | 0.385137 | 0.002   | 0.035364   |
| ENSMUSG000000024457.16 | Trim26        | 0.385111 | 0.00005 | 0.00258735 |
| ENSMUSG000000096687.7  | Mfsd4b4       | 0.382918 | 0.0003  | 0.0100619  |
| ENSMUSG000000030122.12 | Ptms          | 0.382396 | 0.00085 | 0.0203711  |
| ENSMUSG000000024137.8  | E4f1          | 0.380453 | 0.00025 | 0.00905571 |
| ENSMUSG000000042677.7  | Zc3h12a       | 0.379537 | 0.00075 | 0.0188287  |

|                       |               |          |         |            |
|-----------------------|---------------|----------|---------|------------|
| ENSMUSG00000069135.11 | Fgfr1op       | 0.379102 | 0.0003  | 0.0100619  |
| ENSMUSG00000042349.13 | Ikbke         | 0.378942 | 0.0013  | 0.0271076  |
| ENSMUSG00000023393.15 | Slc17a9       | 0.374006 | 0.0012  | 0.0256986  |
| ENSMUSG00000041268.16 | Dmxl2         | 0.373039 | 0.00085 | 0.0203711  |
| ENSMUSG00000052031.7  | Tagap1        | 0.372173 | 0.00015 | 0.00627624 |
| ENSMUSG00000072812.4  | Ahna2         | 0.371072 | 0.00035 | 0.011149   |
| ENSMUSG00000031921.17 | Terf2         | 0.370429 | 0.001   | 0.0226798  |
| ENSMUSG00000025086.12 | Trub1         | 0.370117 | 0.00055 | 0.0152247  |
| ENSMUSG00000023087.15 | Noct          | 0.369088 | 0.0025  | 0.0405307  |
| ENSMUSG00000079003.2  | Samd1         | 0.368443 | 0.00005 | 0.00258735 |
| ENSMUSG00000044712.15 | Slc38a6       | 0.367927 | 0.00145 | 0.0286788  |
| ENSMUSG00000032212.9  | Sltm          | 0.366975 | 0.00005 | 0.00258735 |
| ENSMUSG00000029389.17 | Ddx55         | 0.364357 | 0.0005  | 0.0142449  |
| ENSMUSG00000027615.14 | Hps3          | 0.360117 | 0.00055 | 0.0152247  |
| ENSMUSG00000024193.7  | Phf1          | 0.359026 | 0.00025 | 0.00905571 |
| ENSMUSG00000034160.13 | Ogt           | 0.357576 | 0.0003  | 0.0100619  |
| ENSMUSG00000026349.14 | Ccnt2         | 0.356099 | 0.0008  | 0.0195422  |
| ENSMUSG00000040123.16 | Zmym5         | 0.354782 | 0.0004  | 0.0121904  |
| ENSMUSG00000032519.11 | Slc25a38      | 0.35452  | 0.0026  | 0.0414106  |
| ENSMUSG00000042500.11 | Ago4          | 0.354457 | 0.0002  | 0.00775413 |
| ENSMUSG00000042548.13 | Asx1          | 0.353287 | 0.0004  | 0.0121904  |
| ENSMUSG00000000538.18 | Tom1l2        | 0.351773 | 0.0014  | 0.0281287  |
| ENSMUSG00000037355.14 | Uvssa         | 0.351526 | 0.0005  | 0.0142449  |
| ENSMUSG00000028911.16 | Srsf4         | 0.350223 | 0.0001  | 0.00449574 |
| ENSMUSG00000060301.5  | 2610008E11Rik | 0.348856 | 0.00135 | 0.0276053  |
| ENSMUSG00000033909.17 | Usp36         | 0.347101 | 0.0014  | 0.0281287  |
| ENSMUSG00000042439.12 | Zfp532        | 0.346848 | 0.00155 | 0.0298193  |
| ENSMUSG00000097392.2  | D930016D06Rik | 0.346195 | 0.0009  | 0.0212086  |
| ENSMUSG00000038538.17 | Ubn2          | 0.345111 | 0.00225 | 0.038034   |
| ENSMUSG00000052760.15 | A630001G21Rik | 0.344354 | 0.0006  | 0.0160143  |
| ENSMUSG00000018476.7  | Kdm6b         | 0.343623 | 0.00185 | 0.0333632  |
| ENSMUSG00000035051.14 | Dhx57         | 0.343309 | 0.0021  | 0.0362229  |
| ENSMUSG00000048174.2  | Tmem81        | 0.342336 | 0.0026  | 0.0414106  |
| ENSMUSG00000034820.3  | Cpsf7         | 0.342137 | 0.00025 | 0.00905571 |
| ENSMUSG00000022095.9  | Fam160b2      | 0.340725 | 0.0004  | 0.0121904  |
| ENSMUSG00000035697.14 | Hmha1         | 0.340597 | 0.0003  | 0.0100619  |
| ENSMUSG0000000759.14  | Tubgcp3       | 0.340253 | 0.0016  | 0.0303665  |
| ENSMUSG00000089762.3  | Ier5l         | 0.340159 | 0.00065 | 0.0170615  |
| ENSMUSG00000031508.14 | Ankrd10       | 0.339988 | 0.0012  | 0.0256986  |
| ENSMUSG00000053754.13 | Chd8          | 0.339261 | 0.0024  | 0.0394646  |
| ENSMUSG00000027466.15 | Rbck1         | 0.338484 | 0.00035 | 0.011149   |
| ENSMUSG00000063849.5  | Ppcdc         | 0.338252 | 0.00125 | 0.0265008  |
| ENSMUSG00000031805.17 | Jak3          | 0.335811 | 0.00195 | 0.0348199  |
| ENSMUSG00000046229.9  | Scand1        | 0.335542 | 0.00025 | 0.00905571 |
| ENSMUSG00000086290.8  | Snhg12        | 0.332544 | 0.0027  | 0.04226    |
| ENSMUSG00000016495.12 | Plgrkt        | 0.332498 | 0.00065 | 0.0170615  |
| ENSMUSG00000034379.8  | Wdr5b         | 0.331539 | 0.0034  | 0.0493194  |
| ENSMUSG00000030811.14 | Fbxl19        | 0.33126  | 0.0022  | 0.0374384  |
| ENSMUSG00000020994.4  | Pnn           | 0.330798 | 0.00025 | 0.00905571 |
| ENSMUSG00000026972.15 | Arrdc1        | 0.330302 | 0.0019  | 0.0341193  |
| ENSMUSG00000032643.12 | Fhl3          | 0.32954  | 0.00055 | 0.0152247  |
| ENSMUSG00000060862.9  | Zbtb40        | 0.329323 | 0.00155 | 0.0298193  |
| ENSMUSG00000038351.14 | Sgsm2         | 0.329184 | 0.0032  | 0.0475054  |
| ENSMUSG00000003847.16 | Nfat5         | 0.328952 | 0.00155 | 0.0298193  |
| ENSMUSG00000057649.5  | Brd9          | 0.328915 | 0.00055 | 0.0152247  |
| ENSMUSG00000054716.4  | Zfp771        | 0.328878 | 0.00205 | 0.0356026  |
| ENSMUSG00000021704.7  | Mtx3          | 0.328275 | 0.0013  | 0.0271076  |
| ENSMUSG00000052707.8  | Tnrc6a        | 0.327659 | 0.00175 | 0.0321078  |
| ENSMUSG00000031706.7  | Rfx1          | 0.327197 | 0.00115 | 0.0251808  |
| ENSMUSG00000032589.14 | Bsn           | 0.325655 | 0.00135 | 0.0276053  |
| ENSMUSG00000022529.11 | Zfp263        | 0.325613 | 0.00035 | 0.011149   |
| ENSMUSG00000034022.7  | Cpsf1         | 0.325192 | 0.0021  | 0.0362229  |
| ENSMUSG00000021820.16 | Camk2g        | 0.325047 | 0.00045 | 0.0132986  |
| ENSMUSG000000104960.1 | Snhg8         | 0.324462 | 0.00315 | 0.0472053  |
| ENSMUSG00000025158.7  | Rfng          | 0.324318 | 0.0013  | 0.0271076  |
| ENSMUSG00000041642.18 | Kif21b        | 0.323781 | 0.0004  | 0.0121904  |

|                       |               |           |         |            |
|-----------------------|---------------|-----------|---------|------------|
| ENSMUSG00000045128.8  | Rpl18a        | 0.323408  | 0.0007  | 0.0179285  |
| ENSMUSG00000048279.17 | Sacs          | 0.323124  | 0.00105 | 0.0236027  |
| ENSMUSG00000031833.9  | Mast3         | 0.320968  | 0.00065 | 0.0170615  |
| ENSMUSG00000068917.12 | Clk2          | 0.320287  | 0.0012  | 0.0256986  |
| ENSMUSG00000022559.7  | Fbxl6         | 0.319618  | 0.0011  | 0.0243808  |
| ENSMUSG00000024045.5  | Akap8         | 0.319536  | 0.00025 | 0.00905571 |
| ENSMUSG00000037221.13 | Mospd3        | 0.31899   | 0.0009  | 0.0212086  |
| ENSMUSG00000020150.13 | Gamt          | 0.318412  | 0.0023  | 0.0386217  |
| ENSMUSG00000022568.16 | Scrib         | 0.316498  | 0.00195 | 0.0348199  |
| ENSMUSG00000032329.3  | Hmg20a        | 0.314712  | 0.0011  | 0.0243808  |
| ENSMUSG00000057551.9  | Zfp317        | 0.314612  | 0.00165 | 0.0308991  |
| ENSMUSG00000040712.16 | Camta2        | 0.314165  | 0.0003  | 0.0100619  |
| ENSMUSG00000054312.6  | Mrps21        | 0.313457  | 0.0006  | 0.0160143  |
| ENSMUSG00000041215.15 | Yeats2        | 0.312743  | 0.0032  | 0.0475054  |
| ENSMUSG00000019987.8  | Arg1          | 0.312581  | 0.00055 | 0.0152247  |
| ENSMUSG00000030604.9  | Zfp626        | 0.310139  | 0.00215 | 0.0368347  |
| ENSMUSG00000027569.15 | Mrgbp         | 0.308752  | 0.00115 | 0.0251808  |
| ENSMUSG00000026436.15 | Elk4          | 0.30285   | 0.0026  | 0.0414106  |
| ENSMUSG00000064043.13 | Trerf1        | 0.302754  | 0.00245 | 0.0401306  |
| ENSMUSG00000024188.15 | Luc7l         | 0.30202   | 0.00325 | 0.047911   |
| ENSMUSG00000028060.14 | 2810403A07Rik | 0.29978   | 0.0006  | 0.0160143  |
| ENSMUSG00000063286.7  | Gm8995        | 0.299401  | 0.002   | 0.035364   |
| ENSMUSG00000020806.15 | Rhbdf2        | 0.298886  | 0.0022  | 0.0374384  |
| ENSMUSG00000021453.2  | Gadd45g       | 0.298356  | 0.0007  | 0.0179285  |
| ENSMUSG00000021819.10 | Zswim8        | 0.298247  | 0.00065 | 0.0170615  |
| ENSMUSG00000013858.14 | Tmem259       | 0.296888  | 0.0013  | 0.0271076  |
| ENSMUSG00000042404.16 | Dennd4b       | 0.296484  | 0.0024  | 0.0394646  |
| ENSMUSG00000026544.6  | Dusp23        | 0.29605   | 0.0015  | 0.0293926  |
| ENSMUSG00000035711.4  | Dok3          | 0.295193  | 0.0006  | 0.0160143  |
| ENSMUSG00000035762.10 | Tmem161b      | 0.294605  | 0.00305 | 0.0460881  |
| ENSMUSG00000041164.15 | Zmiz2         | 0.294363  | 0.00125 | 0.0265008  |
| ENSMUSG00000049422.6  | Chchd10       | 0.294325  | 0.0012  | 0.0256986  |
| ENSMUSG00000027580.17 | Helz2         | 0.293739  | 0.00335 | 0.0488738  |
| ENSMUSG00000037907.16 | Ankrd13b      | 0.29315   | 0.0012  | 0.0256986  |
| ENSMUSG00000033020.6  | Polr2f        | 0.292936  | 0.0011  | 0.0243808  |
| ENSMUSG00000001918.17 | Slc1a5        | 0.292262  | 0.002   | 0.035364   |
| ENSMUSG0000002028.12  | Kmt2a         | 0.291713  | 0.0009  | 0.0212086  |
| ENSMUSG00000029817.11 | Tra2a         | 0.291     | 0.00175 | 0.0321078  |
| ENSMUSG00000001034.17 | Mapk7         | 0.288695  | 0.0023  | 0.0386217  |
| ENSMUSG00000025144.17 | Stra13        | 0.288484  | 0.0017  | 0.0314636  |
| ENSMUSG00000038342.15 | Mlxip         | 0.288018  | 0.0022  | 0.0374384  |
| ENSMUSG00000024856.10 | Cdk2ap2       | 0.287504  | 0.00155 | 0.0298193  |
| ENSMUSG00000042675.15 | Ypel3         | 0.283558  | 0.00325 | 0.047911   |
| ENSMUSG00000038406.17 | Scaf1         | 0.282424  | 0.00305 | 0.0460881  |
| ENSMUSG00000067288.12 | Rps28         | 0.282097  | 0.00185 | 0.0333632  |
| ENSMUSG00000090247.7  | Bloc1s1       | 0.279206  | 0.00205 | 0.0356026  |
| ENSMUSG00000033106.5  | Slc7a6os      | 0.277417  | 0.0033  | 0.0485353  |
| ENSMUSG00000028936.15 | Rpl22         | 0.275213  | 0.00295 | 0.0450604  |
| ENSMUSG00000034157.12 | Cipc          | 0.271187  | 0.0026  | 0.0414106  |
| ENSMUSG00000055065.6  | Ddx17         | 0.270191  | 0.00295 | 0.0450604  |
| ENSMUSG00000068758.7  | Il3ra         | 0.269108  | 0.00265 | 0.0418911  |
| ENSMUSG00000031765.7  | Mt1           | 0.267296  | 0.0014  | 0.0281287  |
| ENSMUSG00000022263.9  | Trio          | 0.26239   | 0.00285 | 0.0440101  |
| ENSMUSG00000055943.5  | Emc7          | -0.259959 | 0.0034  | 0.0493194  |
| ENSMUSG00000041781.8  | Cpsf2         | -0.260727 | 0.0034  | 0.0493194  |
| ENSMUSG00000021024.14 | Psma6         | -0.261319 | 0.00345 | 0.0498167  |
| ENSMUSG00000033047.4  | Eif3l         | -0.261976 | 0.0034  | 0.0493194  |
| ENSMUSG00000021003.9  | Galc          | -0.262079 | 0.0027  | 0.04226    |
| ENSMUSG00000041958.10 | Pigs          | -0.262644 | 0.00265 | 0.0418911  |
| ENSMUSG00000024679.10 | Ms4a6d        | -0.263737 | 0.00275 | 0.0429366  |
| ENSMUSG00000024740.9  | Ddb1          | -0.26391  | 0.0031  | 0.0466214  |
| ENSMUSG00000027775.9  | Mfsd1         | -0.26537  | 0.0029  | 0.0445111  |
| ENSMUSG00000006373.10 | Pgrmc1        | -0.266901 | 0.00235 | 0.0389965  |
| ENSMUSG00000019814.4  | Ltv1          | -0.267139 | 0.00335 | 0.0488738  |
| ENSMUSG00000024981.5  | Acs15         | -0.267683 | 0.0024  | 0.0394646  |
| ENSMUSG00000046434.15 | Hnrnpa1       | -0.268078 | 0.00235 | 0.0389965  |



|                       |         |           |         |           |
|-----------------------|---------|-----------|---------|-----------|
| ENSMUSG00000070923.4  | Klh9    | -0.268888 | 0.00205 | 0.0356026 |
| ENSMUSG00000050912.15 | Tmem123 | -0.269675 | 0.0025  | 0.0405307 |
| ENSMUSG00000022533.13 | Atp13a3 | -0.270466 | 0.00245 | 0.0401306 |
| ENSMUSG00000022912.8  | Pros1   | -0.270499 | 0.0023  | 0.0386217 |
| ENSMUSG00000024614.6  | Tmx3    | -0.270993 | 0.00185 | 0.0333632 |
| ENSMUSG00000026781.15 | Acbd5   | -0.272405 | 0.00235 | 0.0389965 |
| ENSMUSG00000044408.6  | Sptssa  | -0.272574 | 0.00215 | 0.0368347 |
| ENSMUSG00000027822.16 | Slc33a1 | -0.272833 | 0.00265 | 0.0418911 |
| ENSMUSG00000020592.14 | Sdc1    | -0.273594 | 0.0029  | 0.0445111 |
| ENSMUSG00000046841.4  | Ckap4   | -0.273775 | 0.00165 | 0.0308991 |
| ENSMUSG00000031165.6  | Was     | -0.274809 | 0.00205 | 0.0356026 |
| ENSMUSG00000045679.13 | Pqlc3   | -0.275022 | 0.00175 | 0.0321078 |
| ENSMUSG00000021108.17 | Prkch   | -0.275429 | 0.00265 | 0.0418911 |
| ENSMUSG00000031337.16 | Mtm1    | -0.277104 | 0.0032  | 0.0475054 |
| ENSMUSG00000051695.6  | Pcbp1   | -0.278097 | 0.0026  | 0.0414106 |
| ENSMUSG00000018822.7  | Sfrp5   | -0.278842 | 0.00205 | 0.0356026 |
| ENSMUSG00000020075.7  | Ddx21   | -0.279205 | 0.0015  | 0.0293926 |
| ENSMUSG00000029634.15 | Rnf6    | -0.279334 | 0.00325 | 0.047911  |
| ENSMUSG00000020720.13 | Psmd12  | -0.279853 | 0.0014  | 0.0281287 |
| ENSMUSG00000022797.15 | Tfrc    | -0.279968 | 0.00295 | 0.0450604 |
| ENSMUSG00000061119.7  | Prcp    | -0.280127 | 0.0019  | 0.0341193 |
| ENSMUSG00000022867.9  | Usp25   | -0.280964 | 0.0017  | 0.0314636 |
| ENSMUSG00000020120.15 | Plek    | -0.281061 | 0.0028  | 0.0435563 |
| ENSMUSG00000037851.13 | Iars    | -0.282093 | 0.0032  | 0.0475054 |
| ENSMUSG00000046079.16 | Lrrc8d  | -0.282343 | 0.00135 | 0.0276053 |
| ENSMUSG00000028419.5  | Chmp5   | -0.283542 | 0.002   | 0.035364  |
| ENSMUSG00000030275.6  | Etnk1   | -0.284648 | 0.00235 | 0.0389965 |
| ENSMUSG00000024991.7  | Eif3a   | -0.284764 | 0.0022  | 0.0374384 |
| ENSMUSG00000021686.4  | Ap3b1   | -0.284845 | 0.00155 | 0.0298193 |
| ENSMUSG00000015750.15 | Aph1a   | -0.284951 | 0.0025  | 0.0405307 |
| ENSMUSG00000019731.13 | Slc35e1 | -0.285369 | 0.00165 | 0.0308991 |
| ENSMUSG00000027782.10 | Kpna4   | -0.28587  | 0.0025  | 0.0405307 |
| ENSMUSG00000009630.10 | Ppp2cb  | -0.286176 | 0.0016  | 0.0303665 |
| ENSMUSG00000064289.15 | Tank    | -0.286412 | 0.00195 | 0.0348199 |
| ENSMUSG00000029038.9  | Ssu72   | -0.286479 | 0.0033  | 0.0485353 |
| ENSMUSG00000022305.12 | Lrp12   | -0.28687  | 0.0016  | 0.0303665 |
| ENSMUSG00000031167.16 | Rbm3    | -0.286997 | 0.0012  | 0.0256986 |
| ENSMUSG00000061232.15 | H2-K1   | -0.287593 | 0.00225 | 0.038034  |
| ENSMUSG00000038774.8  | Ascc3   | -0.28775  | 0.00275 | 0.0429366 |
| ENSMUSG00000024098.5  | Twsg1   | -0.28834  | 0.00245 | 0.0401306 |
| ENSMUSG00000027287.14 | Snap23  | -0.288727 | 0.00345 | 0.0498167 |
| ENSMUSG00000063410.7  | Stk24   | -0.288991 | 0.0013  | 0.0271076 |
| ENSMUSG00000027342.14 | Pcna    | -0.289118 | 0.0012  | 0.0256986 |
| ENSMUSG00000073639.5  | Rab18   | -0.289192 | 0.00135 | 0.0276053 |
| ENSMUSG00000047379.6  | B4gat1  | -0.289386 | 0.00325 | 0.047911  |
| ENSMUSG00000011179.7  | Odc1    | -0.289525 | 0.0021  | 0.0362229 |
| ENSMUSG00000036580.15 | Spg20   | -0.289591 | 0.0016  | 0.0303665 |
| ENSMUSG00000020495.13 | Smg8    | -0.289639 | 0.0032  | 0.0475054 |
| ENSMUSG00000037458.14 | Azin1   | -0.290545 | 0.00205 | 0.0356026 |
| ENSMUSG00000032763.10 | Ilvbl   | -0.290879 | 0.00255 | 0.0411309 |
| ENSMUSG00000030220.13 | Arhgdib | -0.290993 | 0.00145 | 0.0286788 |
| ENSMUSG00000021814.16 | Anxa7   | -0.291828 | 0.0012  | 0.0256986 |
| ENSMUSG00000032112.9  | Trappc4 | -0.2924   | 0.0029  | 0.0445111 |
| ENSMUSG00000040550.16 | Otud6b  | -0.29247  | 0.00135 | 0.0276053 |
| ENSMUSG00000051579.10 | Tceal8  | -0.292645 | 0.0018  | 0.0328824 |
| ENSMUSG00000024218.12 | Taf11   | -0.293154 | 0.0031  | 0.0466214 |
| ENSMUSG00000006304.14 | Arpc2   | -0.294053 | 0.00185 | 0.0333632 |
| ENSMUSG00000001833.16 | Septin7 | -0.294218 | 0.00085 | 0.0203711 |
| ENSMUSG00000024487.4  | Yipf5   | -0.29491  | 0.0012  | 0.0256986 |
| ENSMUSG00000054693.14 | Adam10  | -0.295678 | 0.0007  | 0.0179285 |
| ENSMUSG00000031095.15 | Cul4b   | -0.295885 | 0.00325 | 0.047911  |
| ENSMUSG00000025037.6  | Maoa    | -0.295927 | 0.0014  | 0.0281287 |
| ENSMUSG00000022314.9  | Rad21   | -0.296677 | 0.0007  | 0.0179285 |
| ENSMUSG00000023186.14 | Vwa5a   | -0.297178 | 0.00115 | 0.0251808 |
| ENSMUSG00000029840.8  | Mtpn    | -0.298449 | 0.00085 | 0.0203711 |
| ENSMUSG00000027698.14 | Nceh1   | -0.298889 | 0.00175 | 0.0321078 |

|                       |            |           |         |            |
|-----------------------|------------|-----------|---------|------------|
| ENSMUSG00000022339.8  | Ebag9      | -0.299269 | 0.0027  | 0.04226    |
| ENSMUSG00000032349.13 | Elov15     | -0.29941  | 0.0013  | 0.0271076  |
| ENSMUSG00000023025.15 | Larp4      | -0.299429 | 0.0009  | 0.0212086  |
| ENSMUSG00000015839.6  | Nfe212     | -0.301353 | 0.001   | 0.0226798  |
| ENSMUSG00000026223.15 | Itm2c      | -0.301775 | 0.001   | 0.0226798  |
| ENSMUSG00000034158.9  | Lrrc58     | -0.302005 | 0.0008  | 0.0195422  |
| ENSMUSG00000025647.16 | Shisa5     | -0.30248  | 0.001   | 0.0226798  |
| ENSMUSG00000032412.8  | Atp1b3     | -0.30288  | 0.0009  | 0.0212086  |
| ENSMUSG00000049339.16 | Fam134a    | -0.302988 | 0.0021  | 0.0362229  |
| ENSMUSG00000031353.13 | Rbbp7      | -0.303088 | 0.0025  | 0.0405307  |
| ENSMUSG00000031197.11 | Vbp1       | -0.303889 | 0.00135 | 0.0276053  |
| ENSMUSG00000024759.13 | Atl3       | -0.304808 | 0.00075 | 0.0188287  |
| ENSMUSG00000068798.10 | Rap1a      | -0.30521  | 0.00215 | 0.0368347  |
| ENSMUSG00000026377.12 | Nifk       | -0.305524 | 0.0008  | 0.0195422  |
| ENSMUSG00000036155.13 | Mgat5      | -0.305666 | 0.0006  | 0.0160143  |
| ENSMUSG00000038646.13 | Fam103a1   | -0.306391 | 0.00105 | 0.0236027  |
| ENSMUSG00000043832.13 | Clec4a3    | -0.306711 | 0.0011  | 0.0243808  |
| ENSMUSG00000021592.15 | Arsk       | -0.306753 | 0.0024  | 0.0394646  |
| ENSMUSG00000041891.15 | Lman1      | -0.307426 | 0.001   | 0.0226798  |
| ENSMUSG00000059586.9  | Nsmce2     | -0.307512 | 0.00055 | 0.0152247  |
| ENSMUSG00000022200.7  | Golph3     | -0.30844  | 0.00035 | 0.011149   |
| ENSMUSG00000054079.12 | Utp18      | -0.308489 | 0.001   | 0.0226798  |
| ENSMUSG00000021094.9  | Dhrs7      | -0.308986 | 0.0007  | 0.0179285  |
| ENSMUSG00000095115.2  | Itpr12     | -0.309192 | 0.0007  | 0.0179285  |
| ENSMUSG00000032199.12 | Polr2m     | -0.309574 | 0.0008  | 0.0195422  |
| ENSMUSG00000027068.6  | Dhrs9      | -0.309626 | 0.0005  | 0.0142449  |
| ENSMUSG00000049516.9  | Spty2d1    | -0.310043 | 0.0005  | 0.0142449  |
| ENSMUSG00000004843.6  | Chmp2b     | -0.31064  | 0.00035 | 0.011149   |
| ENSMUSG00000029998.14 | Pcyox1     | -0.311046 | 0.0004  | 0.0121904  |
| ENSMUSG00000032050.16 | Rdx        | -0.311564 | 0.0006  | 0.0160143  |
| ENSMUSG00000093904.1  | Tommm20    | -0.3117   | 0.0005  | 0.0142449  |
| ENSMUSG00000018217.12 | Pmp22      | -0.312013 | 0.00035 | 0.011149   |
| ENSMUSG00000052656.12 | Rnf103     | -0.312283 | 0.00155 | 0.0298193  |
| ENSMUSG00000061666.6  | Gdpd1      | -0.312687 | 0.00145 | 0.0286788  |
| ENSMUSG00000027108.15 | Ola1       | -0.313261 | 0.0012  | 0.0256986  |
| ENSMUSG00000020841.5  | Cpd        | -0.313264 | 0.0004  | 0.0121904  |
| ENSMUSG00000032440.12 | Tgfb2      | -0.313467 | 0.0001  | 0.00449574 |
| ENSMUSG00000030105.8  | Arl8b      | -0.313927 | 0.00045 | 0.0132986  |
| ENSMUSG00000029076.14 | Sdf4       | -0.313977 | 0.0014  | 0.0281287  |
| ENSMUSG00000023075.9  | Akirin1    | -0.314077 | 0.00045 | 0.0132986  |
| ENSMUSG00000032359.14 | Ctsh       | -0.314918 | 0.0017  | 0.0314636  |
| ENSMUSG00000042042.14 | Csgalnact2 | -0.315234 | 0.0006  | 0.0160143  |
| ENSMUSG00000043252.8  | Tmem64     | -0.315494 | 0.00235 | 0.0389965  |
| ENSMUSG00000058254.12 | Tspan7     | -0.315507 | 0.0012  | 0.0256986  |
| ENSMUSG00000021072.12 | Tmx1       | -0.316059 | 0.00205 | 0.0356026  |
| ENSMUSG00000024072.8  | Yipf4      | -0.316209 | 0.0008  | 0.0195422  |
| ENSMUSG00000059089.4  | Fcgr4      | -0.316908 | 0.0005  | 0.0142449  |
| ENSMUSG00000045594.9  | Glb1       | -0.316919 | 0.00335 | 0.0488738  |
| ENSMUSG00000039270.9  | Megf9      | -0.316998 | 0.0027  | 0.04226    |
| ENSMUSG00000008763.16 | Man1a2     | -0.317361 | 0.0014  | 0.0281287  |
| ENSMUSG00000053128.14 | Rnf26      | -0.317654 | 0.00335 | 0.0488738  |
| ENSMUSG00000025915.14 | Sgk3       | -0.319092 | 0.00125 | 0.0265008  |
| ENSMUSG00000038622.7  | Med30      | -0.319487 | 0.00235 | 0.0389965  |
| ENSMUSG00000030659.14 | Nucb2      | -0.320029 | 0.00025 | 0.00905571 |
| ENSMUSG00000022663.3  | Atg3       | -0.320925 | 0.0004  | 0.0121904  |
| ENSMUSG00000021831.8  | Ero1l      | -0.320971 | 0.0006  | 0.0160143  |
| ENSMUSG00000074785.4  | Pixnc1     | -0.32215  | 0.00045 | 0.0132986  |
| ENSMUSG00000055782.8  | Abcd2      | -0.322779 | 0.00175 | 0.0321078  |
| ENSMUSG00000016541.9  | Atxn10     | -0.322841 | 0.00025 | 0.00905571 |
| ENSMUSG00000028173.10 | Wls        | -0.323053 | 0.00085 | 0.0203711  |
| ENSMUSG00000022403.14 | St13       | -0.323236 | 0.00135 | 0.0276053  |
| ENSMUSG00000027809.14 | Etfdh      | -0.323606 | 0.0015  | 0.0293926  |
| ENSMUSG00000040451.17 | Sgms1      | -0.323768 | 0.0005  | 0.0142449  |
| ENSMUSG00000022664.11 | Slc35a5    | -0.324119 | 0.00085 | 0.0203711  |
| ENSMUSG00000029338.13 | Antxr2     | -0.324286 | 0.0003  | 0.0100619  |
| ENSMUSG00000020130.8  | Tbc1d15    | -0.324594 | 0.0004  | 0.0121904  |

|                        |          |           |         |            |
|------------------------|----------|-----------|---------|------------|
| ENSMUSG00000037370.13  | Enpp1    | -0.324612 | 0.0026  | 0.0414106  |
| ENSMUSG00000047139.8   | Cd24a    | -0.324866 | 0.00115 | 0.0251808  |
| ENSMUSG00000000420.15  | Galnt1   | -0.325063 | 0.0003  | 0.0100619  |
| ENSMUSG00000022234.14  | Cct5     | -0.325859 | 0.0001  | 0.00449574 |
| ENSMUSG00000021811.6   | Dnajc9   | -0.3259   | 0.00215 | 0.0368347  |
| ENSMUSG00000027534.16  | Snx16    | -0.326448 | 0.00115 | 0.0251808  |
| ENSMUSG00000016206.6   | H2-M3    | -0.327859 | 0.00165 | 0.0308991  |
| ENSMUSG00000031647.10  | Mfap3l   | -0.328959 | 0.00145 | 0.0286788  |
| ENSMUSG00000049409.9   | Prokr1   | -0.329384 | 0.00125 | 0.0265008  |
| ENSMUSG00000029253.12  | Cenpc1   | -0.329464 | 0.0017  | 0.0314636  |
| ENSMUSG00000079037.9   | Prnp     | -0.329665 | 0.00025 | 0.00905571 |
| ENSMUSG0000001942.7    | Siae     | -0.329768 | 0.0011  | 0.0243808  |
| ENSMUSG00000029569.9   | Tmem168  | -0.330408 | 0.0002  | 0.00775413 |
| ENSMUSG00000037075.6   | Rnf139   | -0.330663 | 0.00215 | 0.0368347  |
| ENSMUSG00000004383.17  | Large    | -0.330956 | 0.00035 | 0.011149   |
| ENSMUSG00000022329.14  | Stk3     | -0.331686 | 0.00025 | 0.00905571 |
| ENSMUSG00000053012.17  | Krcc1    | -0.332079 | 0.00015 | 0.00627624 |
| ENSMUSG000000062082.16 | Cd200r4  | -0.332308 | 0.0002  | 0.00775413 |
| ENSMUSG00000025203.5   | Scd2     | -0.332794 | 0.00015 | 0.00627624 |
| ENSMUSG00000051185.9   | Fam174a  | -0.333036 | 0.0003  | 0.0100619  |
| ENSMUSG00000041084.8   | Ostc     | -0.333835 | 0.0003  | 0.0100619  |
| ENSMUSG00000067336.6   | Bmpr2    | -0.334625 | 0.00035 | 0.011149   |
| ENSMUSG00000037949.7   | Ano10    | -0.334854 | 0.0011  | 0.0243808  |
| ENSMUSG00000003316.14  | Glg1     | -0.334874 | 0.00035 | 0.011149   |
| ENSMUSG00000040747.9   | Cd53     | -0.335027 | 0.00235 | 0.0389965  |
| ENSMUSG00000051675.13  | Trim32   | -0.33534  | 0.00165 | 0.0308991  |
| ENSMUSG00000021248.8   | Tmed10   | -0.336553 | 0.0003  | 0.0100619  |
| ENSMUSG00000041439.15  | Mfsd6    | -0.337164 | 0.00075 | 0.0188287  |
| ENSMUSG00000027195.10  | Hsd17b12 | -0.337639 | 0.0011  | 0.0243808  |
| ENSMUSG00000022742.5   | Cpox     | -0.338531 | 0.00045 | 0.0132986  |
| ENSMUSG00000073139.9   | BCO23829 | -0.338838 | 0.00115 | 0.0251808  |
| ENSMUSG00000033557.17  | Fam20b   | -0.339396 | 0.0002  | 0.00775413 |
| ENSMUSG00000040520.7   | Manea    | -0.339589 | 0.0002  | 0.00775413 |
| ENSMUSG00000020101.14  | Vsir     | -0.340474 | 0.0007  | 0.0179285  |
| ENSMUSG00000021665.7   | Hexb     | -0.340511 | 0.0005  | 0.0142449  |
| ENSMUSG00000038212.15  | Mfsd14b  | -0.340723 | 0.00015 | 0.00627624 |
| ENSMUSG00000035847.15  | Ids      | -0.341298 | 0.00005 | 0.00258735 |
| ENSMUSG00000026356.15  | Dars     | -0.341874 | 0.00015 | 0.00627624 |
| ENSMUSG00000000340.10  | Dbt      | -0.342451 | 0.0004  | 0.0121904  |
| ENSMUSG00000032328.12  | Tmem30a  | -0.34249  | 0.0001  | 0.00449574 |
| ENSMUSG00000032459.9   | Mrps22   | -0.343013 | 0.0012  | 0.0256986  |
| ENSMUSG00000028557.10  | Rnf11    | -0.3432   | 0.0025  | 0.0405307  |
| ENSMUSG00000021929.8   | Kpna3    | -0.343937 | 0.0001  | 0.00449574 |
| ENSMUSG00000022378.13  | Fam49b   | -0.34433  | 0.00035 | 0.011149   |
| ENSMUSG00000020432.12  | Tcn2     | -0.344374 | 0.0001  | 0.00449574 |
| ENSMUSG00000042369.8   | Rbm45    | -0.345689 | 0.00035 | 0.011149   |
| ENSMUSG00000062949.13  | Atp11c   | -0.346138 | 0.00025 | 0.00905571 |
| ENSMUSG00000031532.6   | Saraf    | -0.346333 | 0.0002  | 0.00775413 |
| ENSMUSG00000028007.13  | Snx7     | -0.346505 | 0.00145 | 0.0286788  |
| ENSMUSG00000031246.14  | Sh3bgrl  | -0.346645 | 0.0001  | 0.00449574 |
| ENSMUSG00000030987.5   | Stim1    | -0.347428 | 0.0003  | 0.0100619  |
| ENSMUSG00000035150.15  | Eif2s3x  | -0.348048 | 0.0032  | 0.0475054  |
| ENSMUSG0000001281.9    | Itgb7    | -0.348197 | 0.00005 | 0.00258735 |
| ENSMUSG00000050148.9   | Ubqln2   | -0.348617 | 0.00005 | 0.00258735 |
| ENSMUSG00000026727.10  | Rsu1     | -0.348654 | 0.0001  | 0.00449574 |
| ENSMUSG00000026116.11  | Tmem131  | -0.34964  | 0.0011  | 0.0243808  |
| ENSMUSG00000028517.8   | Plpp3    | -0.349729 | 0.00005 | 0.00258735 |
| ENSMUSG00000025823.9   | Pdia4    | -0.349755 | 0.0002  | 0.00775413 |
| ENSMUSG00000031333.7   | Abcb7    | -0.349804 | 0.00025 | 0.00905571 |
| ENSMUSG00000024785.6   | Rcl1     | -0.349836 | 0.00255 | 0.0411309  |
| ENSMUSG00000074280.5   | Gm6166   | -0.350058 | 0.0005  | 0.0142449  |
| ENSMUSG00000020386.5   | Sar1b    | -0.350195 | 0.00015 | 0.00627624 |
| ENSMUSG00000063895.6   | Nupl1    | -0.350368 | 0.001   | 0.0226798  |
| ENSMUSG00000019818.15  | Cd164    | -0.350494 | 0.0001  | 0.00449574 |
| ENSMUSG00000033207.6   | Mamdc2   | -0.351174 | 0.0002  | 0.00775413 |
| ENSMUSG00000024507.6   | Hsd17b4  | -0.351816 | 0.0028  | 0.0435563  |

|                       |         |           |         |            |
|-----------------------|---------|-----------|---------|------------|
| ENSMUSG00000029672.16 | Fam3c   | -0.352147 | 0.0007  | 0.0179285  |
| ENSMUSG00000021871.17 | Pnp     | -0.353294 | 0.00095 | 0.0220588  |
| ENSMUSG00000062585.11 | Cnr2    | -0.353304 | 0.0003  | 0.0100619  |
| ENSMUSG00000003721.14 | Insig2  | -0.35411  | 0.003   | 0.0455497  |
| ENSMUSG00000043895.5  | S1pr2   | -0.354333 | 0.00025 | 0.00905571 |
| ENSMUSG00000024601.8  | Isoc1   | -0.354934 | 0.00095 | 0.0220588  |
| ENSMUSG00000031007.2  | Atp6ap2 | -0.3555   | 0.00015 | 0.00627624 |
| ENSMUSG00000026980.15 | Ly75    | -0.355541 | 0.001   | 0.0226798  |
| ENSMUSG00000061273.3  | Mmgt1   | -0.355599 | 0.00015 | 0.00627624 |
| ENSMUSG00000039202.12 | Abhd2   | -0.355735 | 0.0005  | 0.0142449  |
| ENSMUSG00000032475.15 | Nck1    | -0.355867 | 0.0012  | 0.0256986  |
| ENSMUSG00000039497.7  | Dse     | -0.356458 | 0.0001  | 0.00449574 |
| ENSMUSG00000038147.13 | Cd84    | -0.357495 | 0.0013  | 0.0271076  |
| ENSMUSG00000026775.9  | Yme11   | -0.357587 | 0.00005 | 0.00258735 |
| ENSMUSG00000013662.5  | Atad1   | -0.357685 | 0.00005 | 0.00258735 |
| ENSMUSG00000022514.14 | Il1rap  | -0.358564 | 0.003   | 0.0455497  |
| ENSMUSG00000039395.8  | Mreg    | -0.358747 | 0.00165 | 0.0308991  |
| ENSMUSG00000028098.13 | Rnf115  | -0.358839 | 0.0001  | 0.00449574 |
| ENSMUSG00000033793.12 | Atp6v1h | -0.358842 | 0.00005 | 0.00258735 |
| ENSMUSG00000026012.2  | Cd28    | -0.358918 | 0.0001  | 0.00449574 |
| ENSMUSG00000040158.12 | Tax1bp3 | -0.359557 | 0.0019  | 0.0341193  |
| ENSMUSG00000014177.10 | Tvp23b  | -0.360031 | 0.00045 | 0.0132986  |
| ENSMUSG00000024896.8  | Minpp1  | -0.361317 | 0.00025 | 0.00905571 |
| ENSMUSG00000078427.2  | Sarnp   | -0.361889 | 0.00025 | 0.00905571 |
| ENSMUSG00000019782.9  | Rwdd1   | -0.362458 | 0.00015 | 0.00627624 |
| ENSMUSG00000074825.4  | Itpril1 | -0.36309  | 0.0025  | 0.0405307  |
| ENSMUSG00000038179.13 | Slamf7  | -0.363468 | 0.00045 | 0.0132986  |
| ENSMUSG00000027995.10 | Tlr2    | -0.363899 | 0.0026  | 0.0414106  |
| ENSMUSG00000008540.11 | Mgst1   | -0.36399  | 0.00015 | 0.00627624 |
| ENSMUSG00000022136.7  | Dnajc3  | -0.364115 | 0.00005 | 0.00258735 |
| ENSMUSG00000037434.7  | Slc30a1 | -0.364568 | 0.00005 | 0.00258735 |
| ENSMUSG00000029426.8  | Scarb2  | -0.364799 | 0.00005 | 0.00258735 |
| ENSMUSG00000060090.16 | Rp2     | -0.364928 | 0.00015 | 0.00627624 |
| ENSMUSG00000015932.8  | Dstn    | -0.36703  | 0.00005 | 0.00258735 |
| ENSMUSG00000027366.12 | Sppl2a  | -0.367535 | 0.002   | 0.035364   |
| ENSMUSG00000042712.10 | Wbp5    | -0.367738 | 0.00005 | 0.00258735 |
| ENSMUSG00000033863.1  | Klf9    | -0.368354 | 0.00055 | 0.0152247  |
| ENSMUSG00000029781.7  | Fkbp9   | -0.368467 | 0.00045 | 0.0132986  |
| ENSMUSG00000066441.14 | Rdh11   | -0.36924  | 0.00005 | 0.00258735 |
| ENSMUSG00000020048.13 | Hsp90b1 | -0.371044 | 0.0003  | 0.0100619  |
| ENSMUSG00000031608.13 | Galnt7  | -0.37263  | 0.0001  | 0.00449574 |
| ENSMUSG00000062070.12 | Pgk1    | -0.373352 | 0.00005 | 0.00258735 |
| ENSMUSG00000037071.2  | Scd1    | -0.37379  | 0.00045 | 0.0132986  |
| ENSMUSG00000030613.13 | Ccdc90b | -0.37406  | 0.0004  | 0.0121904  |
| ENSMUSG00000022257.3  | Laptn4b | -0.374818 | 0.0009  | 0.0212086  |
| ENSMUSG00000031604.10 | Msmo1   | -0.374852 | 0.00015 | 0.00627624 |
| ENSMUSG00000055639.16 | Dach1   | -0.375457 | 0.00125 | 0.0265008  |
| ENSMUSG00000019966.17 | Kitl    | -0.375544 | 0.001   | 0.0226798  |
| ENSMUSG00000009207.15 | Lnp     | -0.375553 | 0.0006  | 0.0160143  |
| ENSMUSG00000015854.7  | Cd5l    | -0.375955 | 0.00005 | 0.00258735 |
| ENSMUSG00000062078.14 | Qk      | -0.376398 | 0.00005 | 0.00258735 |
| ENSMUSG00000028383.17 | Hsd1l2  | -0.376594 | 0.0001  | 0.00449574 |
| ENSMUSG00000059447.13 | Hadhb   | -0.376745 | 0.00005 | 0.00258735 |
| ENSMUSG00000067591.12 | Klra3   | -0.376851 | 0.00315 | 0.0472053  |
| ENSMUSG00000029250.5  | Polr2b  | -0.376927 | 0.0022  | 0.0374384  |
| ENSMUSG00000036764.11 | Dnajc12 | -0.377043 | 0.0016  | 0.0303665  |
| ENSMUSG00000021109.13 | Hif1a   | -0.377719 | 0.0001  | 0.00449574 |
| ENSMUSG00000035164.7  | Zc3h12c | -0.38003  | 0.0032  | 0.0475054  |
| ENSMUSG00000029767.16 | Calu    | -0.380567 | 0.00005 | 0.00258735 |
| ENSMUSG00000033953.10 | Ppp3r1  | -0.38224  | 0.00075 | 0.0188287  |
| ENSMUSG00000072235.5  | Tuba1a  | -0.38428  | 0.00025 | 0.00905571 |
| ENSMUSG00000030786.18 | Itgam   | -0.384339 | 0.00005 | 0.00258735 |
| ENSMUSG00000023921.8  | Mut     | -0.385371 | 0.00005 | 0.00258735 |
| ENSMUSG00000031521.5  | Aga     | -0.385534 | 0.00005 | 0.00258735 |
| ENSMUSG00000020077.14 | Srgn    | -0.385788 | 0.0001  | 0.00449574 |
| ENSMUSG00000010517.7  | Faf1    | -0.38602  | 0.0016  | 0.0303665  |

|                       |               |           |         |            |
|-----------------------|---------------|-----------|---------|------------|
| ENSMUSG00000022110.13 | Sucla2        | -0.386277 | 0.0014  | 0.0281287  |
| ENSMUSG00000045237.5  | 1110012L19Rik | -0.38633  | 0.00045 | 0.0132986  |
| ENSMUSG00000030208.15 | Emp1          | -0.386647 | 0.00005 | 0.00258735 |
| ENSMUSG00000043019.12 | Edem3         | -0.388017 | 0.00005 | 0.00258735 |
| ENSMUSG00000035372.1  | 1810055G02Rik | -0.388668 | 0.0023  | 0.0386217  |
| ENSMUSG00000046324.12 | Ermp1         | -0.389308 | 0.0004  | 0.0121904  |
| ENSMUSG00000022892.10 | App           | -0.389837 | 0.00005 | 0.00258735 |
| ENSMUSG00000066324.2  | Impad1        | -0.390033 | 0.00005 | 0.00258735 |
| ENSMUSG00000032965.10 | Ift57         | -0.390291 | 0.00335 | 0.0488738  |
| ENSMUSG00000017057.9  | Il13ra1       | -0.39076  | 0.00005 | 0.00258735 |
| ENSMUSG00000024074.7  | Crim1         | -0.391183 | 0.0013  | 0.0271076  |
| ENSMUSG00000020091.14 | Eif4ebp2      | -0.391313 | 0.00205 | 0.0356026  |
| ENSMUSG00000021213.11 | Akr1c13       | -0.391852 | 0.0003  | 0.0100619  |
| ENSMUSG00000063800.5  | Prpf38a       | -0.393238 | 0.0005  | 0.0142449  |
| ENSMUSG00000011752.6  | Pgam1         | -0.394121 | 0.00005 | 0.00258735 |
| ENSMUSG00000030096.8  | Slc6a6        | -0.394469 | 0.0001  | 0.00449574 |
| ENSMUSG00000022876.17 | Samsn1        | -0.395051 | 0.00115 | 0.0251808  |
| ENSMUSG00000060147.15 | Serpina6a     | -0.395345 | 0.00045 | 0.0132986  |
| ENSMUSG00000020585.4  | Laptm4a       | -0.395473 | 0.00005 | 0.00258735 |
| ENSMUSG00000029915.14 | Clec5a        | -0.39587  | 0.00015 | 0.00627624 |
| ENSMUSG00000028111.4  | Ctsk          | -0.397706 | 0.00015 | 0.00627624 |
| ENSMUSG00000071855.4  | Ccdc112       | -0.400304 | 0.0018  | 0.0328824  |
| ENSMUSG00000031696.9  | Vps35         | -0.401001 | 0.00005 | 0.00258735 |
| ENSMUSG00000078945.10 | Naip2         | -0.401369 | 0.00005 | 0.00258735 |
| ENSMUSG00000033964.12 | Zbtb41        | -0.40154  | 0.00035 | 0.011149   |
| ENSMUSG00000024085.13 | Man2a1        | -0.401778 | 0.00005 | 0.00258735 |
| ENSMUSG00000019948.3  | Actr6         | -0.403059 | 0.001   | 0.0226798  |
| ENSMUSG00000079293.11 | Clec7a        | -0.403212 | 0.0001  | 0.00449574 |
| ENSMUSG00000021190.14 | Lgmn          | -0.404262 | 0.0004  | 0.0121904  |
| ENSMUSG00000050786.8  | Ccdc126       | -0.406385 | 0.00185 | 0.0333632  |
| ENSMUSG00000016534.15 | Lamp2         | -0.406979 | 0.00015 | 0.00627624 |
| ENSMUSG00000020952.9  | Scfd1         | -0.40731  | 0.0001  | 0.00449574 |
| ENSMUSG00000000787.12 | Ddx3x         | -0.408048 | 0.00005 | 0.00258735 |
| ENSMUSG00000049439.13 | Cyp20a1       | -0.408969 | 0.0002  | 0.00775413 |
| ENSMUSG00000011114.17 | Tbrg1         | -0.409124 | 0.00005 | 0.00258735 |
| ENSMUSG00000047881.14 | Rell1         | -0.409809 | 0.00005 | 0.00258735 |
| ENSMUSG00000035840.6  | Lysmd3        | -0.410315 | 0.00155 | 0.0298193  |
| ENSMUSG00000032667.17 | Pon2          | -0.410608 | 0.00005 | 0.00258735 |
| ENSMUSG00000018927.3  | Ccl6          | -0.411601 | 0.0001  | 0.00449574 |
| ENSMUSG00000022667.17 | Cd200r1       | -0.411947 | 0.00005 | 0.00258735 |
| ENSMUSG00000039005.13 | Tlr4          | -0.412563 | 0.00005 | 0.00258735 |
| ENSMUSG00000022757.18 | Tfg           | -0.412758 | 0.00005 | 0.00258735 |
| ENSMUSG00000038280.12 | Ostm1         | -0.413917 | 0.00005 | 0.00258735 |
| ENSMUSG00000026094.14 | Stk17b        | -0.415601 | 0.00005 | 0.00258735 |
| ENSMUSG00000022255.15 | Mtdh          | -0.417988 | 0.0003  | 0.0100619  |
| ENSMUSG00000025544.13 | Tm9sf2        | -0.418672 | 0.00005 | 0.00258735 |
| ENSMUSG00000029366.10 | Dck           | -0.420133 | 0.00085 | 0.0203711  |
| ENSMUSG00000029571.14 | Tmem106b      | -0.420371 | 0.00005 | 0.00258735 |
| ENSMUSG00000046186.8  | Cd109         | -0.420411 | 0.00005 | 0.00258735 |
| ENSMUSG00000052914.4  | Cyp2j6        | -0.420732 | 0.00035 | 0.011149   |
| ENSMUSG00000046873.18 | Mbtps2        | -0.421687 | 0.00005 | 0.00258735 |
| ENSMUSG00000021116.9  | Eif2s1        | -0.421782 | 0.00005 | 0.00258735 |
| ENSMUSG00000027828.12 | Ssr3          | -0.422765 | 0.00005 | 0.00258735 |
| ENSMUSG00000025809.15 | Itgb1         | -0.424834 | 0.00005 | 0.00258735 |
| ENSMUSG00000022722.18 | Arl6          | -0.426771 | 0.0008  | 0.0195422  |
| ENSMUSG00000034723.11 | Tmx4          | -0.430825 | 0.00005 | 0.00258735 |
| ENSMUSG00000103847.1  | Gm20056       | -0.43083  | 0.0002  | 0.00775413 |
| ENSMUSG00000025804.4  | Ccr1          | -0.431147 | 0.00005 | 0.00258735 |
| ENSMUSG00000029836.15 | Cbx3          | -0.432562 | 0.00145 | 0.0286788  |
| ENSMUSG00000024378.9  | Stard4        | -0.432577 | 0.00075 | 0.0188287  |
| ENSMUSG00000021065.15 | Fut8          | -0.433182 | 0.00005 | 0.00258735 |
| ENSMUSG00000024425.3  | Ndfip1        | -0.435169 | 0.00005 | 0.00258735 |
| ENSMUSG00000045092.8  | S1pr1         | -0.436563 | 0.00005 | 0.00258735 |
| ENSMUSG00000038844.8  | Kif16b        | -0.437226 | 0.0009  | 0.0212086  |
| ENSMUSG00000000001.4  | Gnai3         | -0.437419 | 0.00005 | 0.00258735 |
| ENSMUSG00000029265.4  | Dr1           | -0.438904 | 0.00005 | 0.00258735 |

|                        |           |           |         |            |
|------------------------|-----------|-----------|---------|------------|
| ENSMUSG00000021866.15  | Anxa11    | -0.438956 | 0.00005 | 0.00258735 |
| ENSMUSG00000017707.9   | Serinc3   | -0.439101 | 0.00005 | 0.00258735 |
| ENSMUSG000000056429.4  | Tgoln1    | -0.439593 | 0.00005 | 0.00258735 |
| ENSMUSG000000043998.10 | Mgat2     | -0.441046 | 0.00005 | 0.00258735 |
| ENSMUSG000000020571.12 | Pdia6     | -0.441169 | 0.00005 | 0.00258735 |
| ENSMUSG000000035561.5  | Aldh1b1   | -0.441849 | 0.00005 | 0.00258735 |
| ENSMUSG000000025531.14 | Chm       | -0.442254 | 0.00005 | 0.00258735 |
| ENSMUSG000000022003.6  | Slc25a30  | -0.44473  | 0.00235 | 0.0389965  |
| ENSMUSG000000026342.10 | Slc35f5   | -0.448135 | 0.00005 | 0.00258735 |
| ENSMUSG000000059588.13 | Calcr1    | -0.449945 | 0.0002  | 0.00775413 |
| ENSMUSG000000052738.14 | Suclg1    | -0.450026 | 0.00005 | 0.00258735 |
| ENSMUSG000000026986.14 | Hnmt      | -0.45104  | 0.00005 | 0.00258735 |
| ENSMUSG000000019796.12 | Lrp11     | -0.453677 | 0.0001  | 0.00449574 |
| ENSMUSG000000101188.1  | Eif4a-ps4 | -0.453783 | 0.00005 | 0.00258735 |
| ENSMUSG000000026365.15 | Cfh       | -0.456038 | 0.00005 | 0.00258735 |
| ENSMUSG000000032252.14 | Glce      | -0.457293 | 0.0002  | 0.00775413 |
| ENSMUSG000000026864.13 | Hspa5     | -0.45858  | 0.00005 | 0.00258735 |
| ENSMUSG000000024121.13 | Atp6v0c   | -0.459986 | 0.00005 | 0.00258735 |
| ENSMUSG000000002718.14 | Cse1l     | -0.460136 | 0.0034  | 0.0493195  |
| ENSMUSG000000028270.12 | Gbp2      | -0.460988 | 0.00005 | 0.00258735 |
| ENSMUSG000000053289.7  | Ddx10     | -0.461082 | 0.00005 | 0.00258735 |
| ENSMUSG000000032932.14 | Hspa13    | -0.461095 | 0.00005 | 0.00258735 |
| ENSMUSG000000038633.5  | Degs1     | -0.46173  | 0.00005 | 0.00258735 |
| ENSMUSG000000082433.2  | Gm9025    | -0.462721 | 0.0007  | 0.0179285  |
| ENSMUSG000000069515.5  | Lyz1      | -0.462821 | 0.00005 | 0.00258735 |
| ENSMUSG000000028274.17 | Rngtt     | -0.463529 | 0.00005 | 0.00258735 |
| ENSMUSG000000031703.8  | Itfg1     | -0.464557 | 0.00005 | 0.00258735 |
| ENSMUSG000000019917.9  | Sept10    | -0.465852 | 0.0003  | 0.0100619  |
| ENSMUSG000000021728.7  | Emb       | -0.467693 | 0.00005 | 0.00258735 |
| ENSMUSG000000030560.17 | Ctsc      | -0.467694 | 0.00005 | 0.00258735 |
| ENSMUSG000000042271.13 | Nxt2      | -0.469372 | 0.00005 | 0.00258735 |
| ENSMUSG000000042684.8  | Npl       | -0.469555 | 0.0003  | 0.0100619  |
| ENSMUSG000000052821.3  | Cysltr1   | -0.470871 | 0.0024  | 0.0394646  |
| ENSMUSG000000022351.14 | Sqle      | -0.471421 | 0.00005 | 0.00258735 |
| ENSMUSG000000053253.16 | Ndfip2    | -0.471635 | 0.00005 | 0.00258735 |
| ENSMUSG000000020738.16 | Sumo2     | -0.471832 | 0.00005 | 0.00258735 |
| ENSMUSG000000073987.4  | Ggh       | -0.472007 | 0.00005 | 0.00258735 |
| ENSMUSG000000039197.9  | Adk       | -0.472059 | 0.00005 | 0.00258735 |
| ENSMUSG000000025986.6  | Slc39a10  | -0.472174 | 0.00005 | 0.00258735 |
| ENSMUSG000000062270.13 | Morf4l1   | -0.480108 | 0.00005 | 0.00258735 |
| ENSMUSG000000020368.15 | Canx      | -0.481378 | 0.00005 | 0.00258735 |
| ENSMUSG000000084159.1  | Gm12696   | -0.48204  | 0.0006  | 0.0160143  |
| ENSMUSG000000016319.3  | Slc25a5   | -0.485087 | 0.00005 | 0.00258735 |
| ENSMUSG000000054404.12 | Slfm5     | -0.486071 | 0.00005 | 0.00258735 |
| ENSMUSG000000054843.8  | Atrnl1    | -0.486594 | 0.0004  | 0.0121904  |
| ENSMUSG000000031591.14 | Asah1     | -0.486927 | 0.00005 | 0.00258735 |
| ENSMUSG000000019849.10 | Prep      | -0.487158 | 0.00005 | 0.00258735 |
| ENSMUSG000000025016.10 | Tm9sf3    | -0.489441 | 0.00005 | 0.00258735 |
| ENSMUSG000000057363.12 | Uxs1      | -0.490569 | 0.00005 | 0.00258735 |
| ENSMUSG000000025903.14 | Lypla1    | -0.492047 | 0.00005 | 0.00258735 |
| ENSMUSG000000025934.15 | Gsta3     | -0.493625 | 0.00035 | 0.011149   |
| ENSMUSG000000031555.15 | Adam9     | -0.4945   | 0.00005 | 0.00258735 |
| ENSMUSG000000022021.13 | Diaph3    | -0.497862 | 0.0017  | 0.0314636  |
| ENSMUSG000000020458.16 | Rtn4      | -0.498963 | 0.00005 | 0.00258735 |
| ENSMUSG000000037072.15 | Sept15    | -0.499071 | 0.00305 | 0.0460881  |
| ENSMUSG000000051255.5  | Gm6563    | -0.501068 | 0.00035 | 0.011149   |
| ENSMUSG000000024781.15 | Lipa      | -0.501864 | 0.00005 | 0.00258735 |
| ENSMUSG000000025289.15 | Prdx4     | -0.502013 | 0.00005 | 0.00258735 |
| ENSMUSG000000032320.7  | Rcn2      | -0.504445 | 0.00005 | 0.00258735 |
| ENSMUSG000000021583.6  | Erap1     | -0.504523 | 0.00005 | 0.00258735 |
| ENSMUSG000000038642.10 | Ctss      | -0.506924 | 0.0014  | 0.0281287  |
| ENSMUSG000000025017.9  | Pik3ap1   | -0.508756 | 0.00005 | 0.00258735 |
| ENSMUSG000000038503.15 | Mesdc2    | -0.512344 | 0.00135 | 0.0276053  |
| ENSMUSG000000039007.9  | Cpq       | -0.514232 | 0.00005 | 0.00258735 |
| ENSMUSG000000042082.6  | Arsb      | -0.514893 | 0.00005 | 0.00258735 |
| ENSMUSG000000075470.1  | Alg10b    | -0.51616  | 0.00005 | 0.00258735 |

|                        |               |           |         |            |
|------------------------|---------------|-----------|---------|------------|
| ENSMUSG00000039480.13  | Nt5dc1        | -0.517705 | 0.00005 | 0.00258735 |
| ENSMUSG00000020650.14  | Bcap29        | -0.519899 | 0.00005 | 0.00258735 |
| ENSMUSG000000105987.4  | AI506816      | -0.520442 | 0.00005 | 0.00258735 |
| ENSMUSG000000048970.9  | C1galt1c1     | -0.525606 | 0.00005 | 0.00258735 |
| ENSMUSG000000026617.16 | Bpnt1         | -0.526127 | 0.00005 | 0.00258735 |
| ENSMUSG000000047434.13 | Xyylt1        | -0.527624 | 0.00005 | 0.00258735 |
| ENSMUSG000000056220.14 | Pla2g4a       | -0.528848 | 0.00005 | 0.00258735 |
| ENSMUSG000000031447.7  | Lamp1         | -0.529194 | 0.00005 | 0.00258735 |
| ENSMUSG000000022122.14 | Ednrb         | -0.529383 | 0.00005 | 0.00258735 |
| ENSMUSG000000019877.10 | Serinc1       | -0.53006  | 0.00005 | 0.00258735 |
| ENSMUSG000000094724.7  | Rnaset2b      | -0.531151 | 0.00015 | 0.00627624 |
| ENSMUSG000000003746.15 | Man1a         | -0.531392 | 0.00005 | 0.00258735 |
| ENSMUSG000000054640.14 | Slc8a1        | -0.532602 | 0.0031  | 0.0466214  |
| ENSMUSG000000100801.1  | Gm15459       | -0.534091 | 0.0001  | 0.00449574 |
| ENSMUSG000000036503.13 | Rnf13         | -0.534171 | 0.00005 | 0.00258735 |
| ENSMUSG000000047126.17 | Cltc          | -0.536389 | 0.003   | 0.0455497  |
| ENSMUSG000000028563.16 | Tm2d1         | -0.537236 | 0.00005 | 0.00258735 |
| ENSMUSG000000102869.1  | 2900097C17Rik | -0.538284 | 0.00005 | 0.00258735 |
| ENSMUSG000000023078.6  | Cxcl13        | -0.543386 | 0.0007  | 0.0179285  |
| ENSMUSG000000035133.8  | Arhgap5       | -0.547419 | 0.00005 | 0.00258735 |
| ENSMUSG000000050931.7  | Sgms2         | -0.552774 | 0.00015 | 0.00627624 |
| ENSMUSG000000026361.8  | Cdc73         | -0.553633 | 0.00005 | 0.00258735 |
| ENSMUSG000000082536.1  | Gm13456       | -0.554294 | 0.0005  | 0.0142449  |
| ENSMUSG000000004730.14 | Adgre1        | -0.555572 | 0.00005 | 0.00258735 |
| ENSMUSG000000104913.1  | Gm6560        | -0.557574 | 0.00305 | 0.0460881  |
| ENSMUSG000000024228.12 | Nudt12        | -0.558051 | 0.0006  | 0.0160143  |
| ENSMUSG000000032314.14 | Etfp          | -0.559393 | 0.00005 | 0.00258735 |
| ENSMUSG000000045799.5  | Gm9800        | -0.568633 | 0.00005 | 0.00258735 |
| ENSMUSG000000019872.13 | Smpd13a       | -0.569659 | 0.00005 | 0.00258735 |
| ENSMUSG000000022853.6  | Ehhdh         | -0.572486 | 0.00025 | 0.00905571 |
| ENSMUSG000000027487.11 | Cdk5rap1      | -0.574024 | 0.0002  | 0.00775413 |
| ENSMUSG000000035202.7  | Lars2         | -0.575402 | 0.00005 | 0.00258735 |
| ENSMUSG000000044103.4  | Il1f9         | -0.57913  | 0.00155 | 0.0298193  |
| ENSMUSG000000037852.8  | Cpe           | -0.579595 | 0.00005 | 0.00258735 |
| ENSMUSG000000052428.10 | Tmco1         | -0.585152 | 0.00005 | 0.00258735 |
| ENSMUSG000000020570.14 | Sypl          | -0.592039 | 0.00005 | 0.00258735 |
| ENSMUSG000000023845.6  | Lnpep         | -0.593034 | 0.00005 | 0.00258735 |
| ENSMUSG000000017831.7  | Rab5a         | -0.597619 | 0.00005 | 0.00258735 |
| ENSMUSG000000033184.14 | Tmed7         | -0.606223 | 0.00005 | 0.00258735 |
| ENSMUSG000000022092.10 | Ppp3cc        | -0.607301 | 0.00005 | 0.00258735 |
| ENSMUSG000000098178.1  | Gm42418       | -0.61038  | 0.0002  | 0.00775413 |
| ENSMUSG000000056234.14 | Ncoa4         | -0.626312 | 0.0005  | 0.0142449  |
| ENSMUSG00000002944.15  | Cd36          | -0.629375 | 0.00005 | 0.00258735 |
| ENSMUSG000000074419.11 | Gm15448       | -0.629836 | 0.0001  | 0.00449574 |
| ENSMUSG000000027963.14 | Extl2         | -0.631997 | 0.00005 | 0.00258735 |
| ENSMUSG000000024887.9  | Asah2         | -0.638378 | 0.00005 | 0.00258735 |
| ENSMUSG000000028156.12 | Eif4e         | -0.686189 | 0.00205 | 0.0356026  |
| ENSMUSG000000024298.14 | Zfp871        | -0.686204 | 0.0001  | 0.00449574 |
| ENSMUSG000000060703.12 | Cd302         | -0.701273 | 0.00005 | 0.00258735 |
| ENSMUSG000000048234.13 | Rnf149        | -0.708054 | 0.00005 | 0.00258735 |
| ENSMUSG000000059195.10 | Gm12715       | -0.724215 | 0.00005 | 0.00258735 |
| ENSMUSG000000024600.8  | Slc27a6       | -0.734748 | 0.00005 | 0.00258735 |
| ENSMUSG000000048732.5  | Kihl11        | -0.744624 | 0.0008  | 0.0195422  |
| ENSMUSG000000014905.3  | Dnajb9        | -0.744725 | 0.00005 | 0.00258735 |
| ENSMUSG000000039530.17 | Tusc3         | -0.755475 | 0.00005 | 0.00258735 |
| ENSMUSG000000027834.15 | Serpini1      | -0.779603 | 0.0017  | 0.0314636  |
| ENSMUSG000000024084.7  | Qpct          | -0.792036 | 0.00005 | 0.00258735 |
| ENSMUSG000000033792.12 | Atp7a         | -0.811561 | 0.0009  | 0.0212086  |
| ENSMUSG000000067714.13 | Lpar5         | -0.84304  | 0.00055 | 0.0152247  |
| ENSMUSG000000089942.9  | Pira2         | -0.849296 | 0.00005 | 0.00258735 |
| ENSMUSG000000035142.18 | Nubpl         | -0.85251  | 0.00185 | 0.0333632  |
| ENSMUSG000000079625.2  | Tm4sf19       | -0.862598 | 0.00005 | 0.00258735 |
| ENSMUSG000000034488.14 | Edil3         | -0.878376 | 0.0001  | 0.00449574 |
| ENSMUSG000000079685.9  | Ulbp1         | -0.895772 | 0.00005 | 0.00258735 |
| ENSMUSG000000081723.1  | Gm15931       | -0.897487 | 0.00005 | 0.00258735 |
| ENSMUSG000000081121.1  | Gm12791       | -0.938691 | 0.00235 | 0.0389965  |

|                       |               |           |         |            |
|-----------------------|---------------|-----------|---------|------------|
| ENSMUSG00000090675.1  | Olf111        | -0.943043 | 0.00025 | 0.00905571 |
| ENSMUSG00000031138.4  | F9            | -0.951283 | 0.00225 | 0.038034   |
| ENSMUSG00000053205.8  | Styx          | -0.959008 | 0.0004  | 0.0121904  |
| ENSMUSG00000028262.13 | Clca3a2       | -0.969047 | 0.0006  | 0.0160143  |
| ENSMUSG00000067161.6  | Gm5560        | -1.01026  | 0.0026  | 0.0414106  |
| ENSMUSG00000074417.9  | Gm14548       | -1.02821  | 0.00005 | 0.00258735 |
| ENSMUSG00000038594.8  | Cep85l        | -1.04266  | 0.00145 | 0.0286788  |
| ENSMUSG00000090124.7  | Ugt1a7c       | -1.06383  | 0.0002  | 0.00775413 |
| ENSMUSG00000025257.5  | Ribc1         | -1.08476  | 0.0003  | 0.0100619  |
| ENSMUSG00000065037.1  | Rn7sk         | -1.08669  | 0.00005 | 0.00258735 |
| ENSMUSG00000025019.15 | Lcor          | -1.15671  | 0.00005 | 0.00258735 |
| ENSMUSG00000054178.1  | Gm9938        | -1.18102  | 0.00135 | 0.0276053  |
| ENSMUSG000000109836.1 | RP24-464B16.1 | -1.23736  | 0.00005 | 0.00258735 |
| ENSMUSG00000020728.17 | Cep112        | -1.28726  | 0.001   | 0.0226798  |
| ENSMUSG000000108659.1 | Gm34121       | -1.33781  | 0.0023  | 0.0386217  |
| ENSMUSG00000079884.6  | Gm10698       | -1.51509  | 0.00335 | 0.0488738  |
| ENSMUSG00000030156.5  | Cd69          | -1.65839  | 0.00085 | 0.0203711  |



**Table S6. Genes significantly regulated at and adjusted p-value (q-value)<0.05 in *Ldah* -KO PM treated with oxLDL.**

Data were analyzed using the Wald test (two-tailed) followed by the Benjamini–Hochberg test to estimate the false discovery rate adjusted p-value (q\_value).

| gene_id               | gene synonym  | log2_fold change_KO/WT | p_value | q_value   |
|-----------------------|---------------|------------------------|---------|-----------|
| ENSMUSG00000000753.15 | Serpinf1      | -1.49762               | 0.00005 | 0.0114713 |
| ENSMUSG00000001119.7  | Col6a1        | -1.14729               | 0.00005 | 0.0114713 |
| ENSMUSG00000001506.10 | Col1a1        | -1.37587               | 0.00005 | 0.0114713 |
| ENSMUSG00000002020.15 | Ltbp2         | -1.39651               | 0.0001  | 0.0196651 |
| ENSMUSG00000002900.15 | Lamb1         | -1.60141               | 0.0002  | 0.0321792 |
| ENSMUSG00000005397.7  | Nid1          | -1.1491                | 0.00005 | 0.0114713 |
| ENSMUSG00000012428.9  | Steap4        | -1.12344               | 0.00005 | 0.0114713 |
| ENSMUSG00000014329.14 | Bicc1         | -1.29402               | 0.00005 | 0.0114713 |
| ENSMUSG00000014599.10 | Csf1          | -1.09559               | 0.00035 | 0.0498408 |
| ENSMUSG00000015854.7  | Cd5l          | 0.645319               | 0.00005 | 0.0114713 |
| ENSMUSG00000016252.7  | Atp5e         | 0.571493               | 0.00015 | 0.0265479 |
| ENSMUSG00000016458.13 | Wt1           | -0.935166              | 0.00015 | 0.0265479 |
| ENSMUSG00000018593.12 | Sparc         | -0.997256              | 0.00005 | 0.0114713 |
| ENSMUSG00000018822.7  | Sfrp5         | -0.723961              | 0.00005 | 0.0114713 |
| ENSMUSG00000019852.6  | Arfgef3       | -0.79976               | 0.0002  | 0.0321792 |
| ENSMUSG00000019929.15 | Dcn           | -0.67407               | 0.00005 | 0.0114713 |
| ENSMUSG00000019997.11 | Ctgf          | -1.14922               | 0.00005 | 0.0114713 |
| ENSMUSG00000020241.13 | Col6a2        | -0.938179              | 0.00005 | 0.0114713 |
| ENSMUSG00000020427.11 | Igfbp3        | -1.76014               | 0.00005 | 0.0114713 |
| ENSMUSG00000020473.13 | Aebp1         | -1.23365               | 0.00005 | 0.0114713 |
| ENSMUSG00000021390.5  | Ogn           | -1.5494                | 0.00005 | 0.0114713 |
| ENSMUSG00000021745.13 | Ptprg         | -3.20287               | 0.00005 | 0.0114713 |
| ENSMUSG00000022098.9  | Bmp1          | -0.931806              | 0.00025 | 0.0397083 |
| ENSMUSG00000022425.15 | Enpp2         | -1.28249               | 0.00005 | 0.0114713 |
| ENSMUSG00000022665.14 | Ccdc80        | -1.00855               | 0.00005 | 0.0114713 |
| ENSMUSG00000023078.6  | Cxcl13        | -1.64697               | 0.00005 | 0.0114713 |
| ENSMUSG00000024087.3  | Cyp1b1        | -1.2394                | 0.00005 | 0.0114713 |
| ENSMUSG00000024164.15 | C3            | -1.17284               | 0.00005 | 0.0114713 |
| ENSMUSG00000024304.14 | Cdh2          | -1.09516               | 0.00005 | 0.0114713 |
| ENSMUSG00000024529.13 | Lox           | -1.0114                | 0.0001  | 0.0196651 |
| ENSMUSG00000026042.16 | Col5a2        | -1.12524               | 0.00005 | 0.0114713 |
| ENSMUSG00000026072.12 | Il1r1         | -1.18295               | 0.00005 | 0.0114713 |
| ENSMUSG00000026193.15 | Fn1           | -1.13939               | 0.00005 | 0.0114713 |
| ENSMUSG00000026208.9  | Des           | -1.24421               | 0.00005 | 0.0114713 |
| ENSMUSG00000026399.12 | Cd55          | -0.810928              | 0.00005 | 0.0114713 |
| ENSMUSG00000027210.20 | Meis2         | -2.05303               | 0.00005 | 0.0114713 |
| ENSMUSG00000027360.5  | Hdc           | -3.18431               | 0.00035 | 0.0498408 |
| ENSMUSG00000027797.15 | Dclk1         | -1.89016               | 0.0001  | 0.0196651 |
| ENSMUSG00000028195.4  | Cyr61         | -0.891543              | 0.0003  | 0.0447795 |
| ENSMUSG00000029231.15 | Pdgfra        | -1.27891               | 0.00005 | 0.0114713 |
| ENSMUSG00000029371.7  | Cxcl5         | -1.28466               | 0.00005 | 0.0114713 |
| ENSMUSG00000029380.11 | Cxcl1         | -0.820937              | 0.00005 | 0.0114713 |
| ENSMUSG00000029581.14 | Fscn1         | -0.974756              | 0.00005 | 0.0114713 |
| ENSMUSG00000029661.16 | Col1a2        | -1.30902               | 0.00005 | 0.0114713 |
| ENSMUSG00000030022.14 | Adamts9       | -1.41696               | 0.00005 | 0.0114713 |
| ENSMUSG00000030117.5  | Gdf3          | 1.78044                | 0.00005 | 0.0114713 |
| ENSMUSG00000031375.17 | Bgn           | -0.85879               | 0.00015 | 0.0265479 |
| ENSMUSG00000031380.10 | Figf          | -1.48628               | 0.0002  | 0.0321792 |
| ENSMUSG00000031517.8  | Gpm6a         | -0.853333              | 0.00035 | 0.0498408 |
| ENSMUSG00000031673.6  | Cdh11         | -1.06729               | 0.00005 | 0.0114713 |
| ENSMUSG00000031877.8  | Ces2g         | -1.18611               | 0.0002  | 0.0321792 |
| ENSMUSG00000032216.14 | Nedd4         | -0.875488              | 0.00005 | 0.0114713 |
| ENSMUSG00000032372.14 | Plscr2        | -1.19169               | 0.0001  | 0.0196651 |
| ENSMUSG00000034205.16 | Loxl2         | -1.32813               | 0.00005 | 0.0114713 |
| ENSMUSG00000034573.14 | Ptpn13        | -1.1545                | 0.00005 | 0.0114713 |
| ENSMUSG00000035202.7  | Lars2         | -0.826839              | 0.00015 | 0.0265479 |
| ENSMUSG00000035373.2  | Ccl7          | -0.837967              | 0.00015 | 0.0265479 |
| ENSMUSG00000035595.6  | 1600002K03Rik | 0.613669               | 0.0003  | 0.0447795 |
| ENSMUSG00000035783.8  | Acta2         | -0.804877              | 0.00005 | 0.0114713 |
| ENSMUSG00000036902.10 | Neto2         | -0.838181              | 0.0001  | 0.0196651 |
| ENSMUSG00000037669.14 | Ldah          | -0.581416              | 0.0001  | 0.0196651 |

|                       |                |           |         |           |
|-----------------------|----------------|-----------|---------|-----------|
| ENSMUSG00000038418.7  | Egr1           | -0.880716 | 0.0002  | 0.0321792 |
| ENSMUSG00000039001.12 | Rps21          | 0.565696  | 0.0003  | 0.0447795 |
| ENSMUSG00000039221.10 | Rpl22l1        | 0.656477  | 0.00005 | 0.0114713 |
| ENSMUSG00000039252.11 | Lgi2           | -1.28286  | 0.0001  | 0.0196651 |
| ENSMUSG00000039831.16 | Arhgap29       | -1.00632  | 0.00005 | 0.0114713 |
| ENSMUSG00000040152.8  | Thbs1          | -0.587178 | 0.0002  | 0.0321792 |
| ENSMUSG00000042985.7  | Upk3b          | -1.27702  | 0.00005 | 0.0114713 |
| ENSMUSG00000043110.2  | Lrrn4          | -0.992193 | 0.0002  | 0.0321792 |
| ENSMUSG00000045954.7  | Sdpr           | -1.13972  | 0.00005 | 0.0114713 |
| ENSMUSG00000047907.11 | Tshz2          | -1.49576  | 0.00005 | 0.0114713 |
| ENSMUSG00000048376.5  | F2r            | -1.11748  | 0.00005 | 0.0114713 |
| ENSMUSG00000049521.1  | Cdc42ep1       | -1.54031  | 0.0003  | 0.0447795 |
| ENSMUSG00000050953.9  | Gja1           | -1.04909  | 0.00015 | 0.0265479 |
| ENSMUSG00000052911.9  | Lamb2          | -2.46259  | 0.0003  | 0.0447795 |
| ENSMUSG00000052957.7  | Gas1           | -0.896758 | 0.00005 | 0.0114713 |
| ENSMUSG00000054793.8  | Cadm4          | -0.863708 | 0.00015 | 0.0265479 |
| ENSMUSG00000061048.7  | Cdh3           | -1.48003  | 0.00005 | 0.0114713 |
| ENSMUSG00000061353.11 | Cxcl12         | -0.945077 | 0.00005 | 0.0114713 |
| ENSMUSG00000065037.1  | Rn7sk          | -1.26051  | 0.0001  | 0.0196651 |
| ENSMUSG00000068240.5  | Gm11808        | 0.654087  | 0.00005 | 0.0114713 |
| ENSMUSG00000070436.12 | Serpinh1       | -0.83167  | 0.00005 | 0.0114713 |
| ENSMUSG00000071984.10 | Fndc1          | -2.45468  | 0.0001  | 0.0196651 |
| ENSMUSG00000075254.11 | Heg1           | -0.92478  | 0.00005 | 0.0114713 |
| ENSMUSG00000097971.3  | Gm26917        | -0.998563 | 0.00005 | 0.0114713 |
| ENSMUSG00000100658.1  | F730311O21Rik  | -0.761817 | 0.00035 | 0.0498408 |
| ENSMUSG00000110386.1  | RP23-359B23.11 | 0.953329  | 0.00005 | 0.0114713 |

**Table S7. Genes with expression proportional to LDAH levels.**

| <b>Approved symbol</b> | <b>Approved name</b>                                     |
|------------------------|----------------------------------------------------------|
| Serpinf1               | serpin family F member 1                                 |
| Col1A1                 | collagen type I alpha 1 chain                            |
| Fscn1                  | fascin actin-bundling protein 1                          |
| Vegfd                  | vascular endothelial growth factor D                     |
| Ldah                   | lipid droplet associated hydrolase                       |
| Col6A1                 | collagen type VI alpha 1 chain                           |
| Ltbp2                  | latent transforming growth factor beta binding protein 2 |
| Ltbp3                  | latent transforming growth factor beta binding protein 3 |
| Lamb1                  | laminin subunit beta 1                                   |
| Bicc1                  | BicC family RNA binding protein 1                        |
| Csf1                   | colony stimulating factor 1                              |
| Sparc                  | secreted protein acidic and cysteine rich                |
| Ccn2                   | cellular communication network factor 2                  |
| Col6A2                 | collagen type VI alpha 2 chain                           |
| Igfbp3                 | insulin like growth factor binding protein 3             |
| Aebp1                  | AE binding protein 1                                     |
| Ogn                    | osteoglycin                                              |
| Bmp1                   | bone morphogenetic protein 1                             |
| Cdh2                   | cadherin 2                                               |
| Col5A2                 | collagen type V alpha 2 chain                            |
| Il1R1                  | interleukin 1 receptor type 1                            |
| Des                    | desmin                                                   |
| Cd55                   | CD55 molecule (Cromer blood group)                       |
| Meis2                  | Meis homeobox 2                                          |
| Hdc                    | histidine decarboxylase                                  |
| Heca                   | hdc homolog, cell cycle regulator                        |
| Dclk1                  | doublecortin like kinase 1                               |
| Ccn1                   | cellular communication network factor 1                  |
| Pdgfra                 | platelet derived growth factor receptor alpha            |
| Cxcl1                  | C-X-C motif chemokine ligand 1                           |
| Col1A2                 | collagen type I alpha 2 chain                            |
| Bgn                    | biglycan                                                 |
| Plscr2                 | phospholipid scramblase 2                                |
| Loxl2                  | lysyl oxidase like 2                                     |
| Ptpn13                 | protein tyrosine phosphatase non-receptor type 13        |
| Ccl7                   | C-C motif chemokine ligand 7                             |
| Acta2                  | actin alpha 2, smooth muscle                             |
| Lgi2                   | leucine rich repeat LGI family member 2                  |
| Arhgap29               | Rho GTPase activating protein 29                         |
| Upk3B                  | uroplakin 3B                                             |

|          |                                                               |
|----------|---------------------------------------------------------------|
| F2R      | coagulation factor II thrombin receptor                       |
| Cdc42Ep1 | CDC42 effector protein 1                                      |
| Gas1     | growth arrest specific 1                                      |
| Cadm4    | cell adhesion molecule 4                                      |
| Cdh3     | cadherin 3                                                    |
| Cdh15    | cadherin 15                                                   |
| Cxcl12   | C-X-C motif chemokine ligand 12                               |
| Serpinh1 | serpin family H member 1                                      |
| Fndc1    | fibronectin type III domain containing 1                      |
| Mx1      | MX dynamin like GTPase 1                                      |
| Tom1L2   | target of myb1 like 2 membrane trafficking protein            |
| Mapk7    | mitogen-activated protein kinase 7                            |
| Ocrl     | OCRL inositol polyphosphate-5-phosphatase                     |
| Gramd1A  | GRAM domain containing 1A                                     |
| Slc1A5   | solute carrier family 1 member 5                              |
| Kmt2A    | lysine methyltransferase 2A                                   |
| Dyrk1B   | dual specificity tyrosine phosphorylation regulated kinase 1B |
| Dennd1C  | DENN domain containing 1C                                     |
| Nfat5    | nuclear factor of activated T cells 5                         |
| Kifc2    | kinesin family member C2                                      |
| Pan2     | poly(A) specific ribonuclease subunit PAN2                    |
| Nlrp4    | NLR family pyrin domain containing 4                          |
| Rdh14    | retinol dehydrogenase 14                                      |
| Hnrnp1   | heterogeneous nuclear ribonucleoprotein H1                    |
| Fnbp4    | formin binding protein 4                                      |
| Dqx1     | DEAQ-box RNA dependent ATPase 1                               |
| Ubp1     | upstream binding protein 1                                    |
| Rbm25    | RNA binding motif protein 25                                  |
| Cfap161  | cilia and flagella associated protein 161                     |
| Ptprs    | protein tyrosine phosphatase receptor type S                  |
| Slc9A5   | solute carrier family 9 member A5                             |
| Gdi1     | GDP dissociation inhibitor 1                                  |
| Dennd6B  | DENN domain containing 6B                                     |
| Kdm6B    | lysine demethylase 6B                                         |
| Tada2A   | transcriptional adaptor 2A                                    |
| Syne4    | spectrin repeat containing nuclear envelope family member 4   |
| Rmnd1    | required for meiotic nuclear division 1 homolog               |
| Arg1     | arginase 1                                                    |
| Tinagl1  | tubulointerstitial nephritis antigen like 1                   |
| Clk4     | CDC like kinase 4                                             |
| Limk2    | LIM domain kinase 2                                           |
| Polm     | DNA polymerase mu                                             |

|          |                                                                        |
|----------|------------------------------------------------------------------------|
| Unk      | unk zinc finger                                                        |
| Rhbdf2   | rhomboid 5 homolog 2                                                   |
| Ntn1     | netrin 1                                                               |
| Pnn      | pinin, desmosome associated protein                                    |
| Meg3     | maternally expressed 3                                                 |
| Fam193B  | family with sequence similarity 193 member B                           |
| Mtx3     | metaxin 3                                                              |
| Mss51    | MSS51 mitochondrial translational activator                            |
| Zswim8   | zinc finger SWIM-type containing 8                                     |
| Camk2G   | calcium/calmodulin dependent protein kinase II gamma                   |
| Nisch    | nischarin                                                              |
| Fam160B2 | family with sequence similarity 160 member B2                          |
| Acin1    | apoptotic chromatin condensation inducer 1                             |
| Zscan26  | zinc finger and SCAN domain containing 26                              |
| Trio     | trio Rho guanine nucleotide exchange factor                            |
| Pde1B    | phosphodiesterase 1B                                                   |
| Paxbp1   | PAX3 and PAX7 binding protein 1                                        |
| Prpf40B  | pre-mRNA processing factor 40 homolog B                                |
| Celsr3   | cadherin EGF LAG seven-pass G-type receptor 3                          |
| Slc25A27 | solute carrier family 25 member 27                                     |
| Trem11   | triggering receptor expressed on myeloid cells like 1                  |
| Akap8    | A-kinase anchoring protein 8                                           |
| Luc7L    | LUC7 like                                                              |
| Adamts10 | ADAM metallopeptidase with thrombospondin type 1 motif 10              |
| Trim26   | tripartite motif containing 26                                         |
| Pcyt2    | phosphate cytidyltransferase 2, ethanolamine                           |
| Tepsin   | TEPSIN adaptor related protein complex 4 accessory protein             |
| Pidd1    | p53-induced death domain protein 1                                     |
| Ccnt2    | cyclin T2                                                              |
| Elk4     | ETS transcription factor ELK4                                          |
| Sapcd2   | suppressor APC domain containing 2                                     |
| Arrdc1   | arrestin domain containing 1                                           |
| Mdk      | midkine                                                                |
| Dll4     | delta like canonical Notch ligand 4                                    |
| Adam33   | ADAM metallopeptidase domain 33                                        |
| Rbck1    | RANBP2-type and C3HC4-type zinc finger containing 1                    |
| Stx16    | syntaxin 16                                                            |
| Helz2    | helicase with zinc finger 2                                            |
| Alpk1    | alpha kinase 1                                                         |
| Riiad1   | regulatory subunit of type II PKA R-subunit (RIIa) domain containing 1 |
| Tpm2     | tropomyosin 2                                                          |
| Tekt2    | tektin 2                                                               |

|          |                                                             |
|----------|-------------------------------------------------------------|
| Miip     | migration and invasion inhibitory protein                   |
| Luc7L2   | LUC7 like 2, pre-mRNA splicing factor                       |
| Fbxl19   | F-box and leucine rich repeat protein 19                    |
| Wdr13    | WD repeat domain 13                                         |
| Phka2    | phosphorylase kinase regulatory subunit alpha 2             |
| Rfx1     | regulatory factor X1                                        |
| Mast3    | microtubule associated serine/threonine kinase 3            |
| Lpar2    | lysophosphatidic acid receptor 2                            |
| Terf2    | telomeric repeat binding factor 2                           |
| Trim29   | tripartite motif containing 29                              |
| Pde4A    | phosphodiesterase 4A                                        |
| Dock6    | dedicator of cytokinesis 6                                  |
| Sltm     | SAFB like transcription modulator                           |
| Hmg20A   | high mobility group 20A                                     |
| Bsn      | bassoon presynaptic cytomatrix protein                      |
| Amt      | aminomethyltransferase                                      |
| Srek1    | splicing regulatory glutamic acid and lysine rich protein 1 |
| Oas2     | 2'-5'-oligoadenylate synthetase 2                           |
| Stard9   | StAR related lipid transfer domain containing 9             |
| Mtss2    | MTSS I-BAR domain containing 2                              |
| Ppp1R16A | protein phosphatase 1 regulatory subunit 16A                |
| Cpsf1    | cleavage and polyadenylation specific factor 1              |
| Cipc     | CLOCK interacting pacemaker                                 |
| Ogt      | O-linked N-acetylglucosamine (GlcNAc) transferase           |
| Slc25A37 | solute carrier family 25 member 37                          |
| Znf2     | zinc finger protein 2                                       |
| Cpsf7    | cleavage and polyadenylation specific factor 7              |
| Dhx57    | DEXH-box helicase 57                                        |
| Mid1     | midline 1                                                   |
| Leng8    | leukocyte receptor cluster member 8                         |
| Prpf39   | pre-mRNA processing factor 39                               |
| Zcchc7   | zinc finger CCHC-type containing 7                          |
| Arhgap45 | Rho GTPase activating protein 45                            |
| Usp35    | ubiquitin specific peptidase 35                             |
| Bbs10    | Bardet-Biedl syndrome 10                                    |
| Wnt4     | Wnt family member 4                                         |
| Ehmt1    | euchromatic histone lysine methyltransferase 1              |
| Stag3    | stromal antigen 3                                           |
| Znf692   | zinc finger protein 692                                     |
| Uvssa    | UV stimulated scaffold protein A                            |
| Cep85    | centrosomal protein 85                                      |
| Thoc2    | THO complex 2                                               |

|          |                                                            |
|----------|------------------------------------------------------------|
| Ankrd13B | ankyrin repeat domain 13B                                  |
| Zc3H7A   | zinc finger CCCH-type containing 7A                        |
| Wnk2     | WNK lysine deficient protein kinase 2                      |
| Mlxip    | MLX interacting protein                                    |
| Sgsm2    | small G protein signaling modulator 2                      |
| Scaf1    | SR-related CTD associated factor 1                         |
| Ubn2     | ubiquitin 2                                                |
| Ralgps1  | Ral GEF with PH domain and SH3 binding motif 1             |
| Zmym5    | zinc finger MYM-type containing 5                          |
| Camta2   | calmodulin binding transcription activator 2               |
| Tet2     | tet methylcytosine dioxygenase 2                           |
| Zmiz2    | zinc finger MIZ-type containing 2                          |
| Yeats2   | YEATS domain containing 2                                  |
| Chd7     | chromodomain helicase DNA binding protein 7                |
| Dmxl2    | Dmx like 2                                                 |
| Kif21B   | kinesin family member 21B                                  |
| Grk3     | G protein-coupled receptor kinase 3                        |
| Ikbke    | inhibitor of nuclear factor kappa B kinase subunit epsilon |
| Dennd4B  | DENN domain containing 4B                                  |
| Ago4     | argonaute RISC component 4                                 |
| Asxl1    | ASXL transcriptional regulator 1                           |
| Safb2    | scaffold attachment factor B2                              |
| Als2Cl   | ALS2 C-terminal like                                       |
| Slc38A6  | solute carrier family 38 member 6                          |
| Shb      | SH2 domain containing adaptor protein B                    |
| Tmem86B  | transmembrane protein 86B                                  |
| Trim39   | tripartite motif containing 39                             |
| Npas4    | neuronal PAS domain protein 4                              |
| Rbp1     | retinol binding protein 1                                  |
| Arid4A   | AT-rich interaction domain 4A                              |
| Ankrd16  | ankyrin repeat domain 16                                   |
| Tmem81   | transmembrane protein 81                                   |
| Sacs     | sacsin molecular chaperone                                 |
| Phldb1   | pleckstrin homology like domain family B member 1          |
| Slc25A47 | solute carrier family 25 member 47                         |
| Morn4    | MORN repeat containing 4                                   |
| Ptges    | prostaglandin E synthase                                   |
| Nlgn2    | neuroligin 2                                               |
| Tchh     | trichohyalin                                               |
| Nav2     | neuron navigator 2                                         |
| Tnrc6A   | trinucleotide repeat containing adaptor 6A                 |
| Usp21    | ubiquitin specific peptidase 21                            |

|          |                                                                  |
|----------|------------------------------------------------------------------|
| Usp25    | ubiquitin specific peptidase 25                                  |
| Chd8     | chromodomain helicase DNA binding protein 8                      |
| Lgals4   | galectin 4                                                       |
| Ercc6    | ERCC excision repair 6, chromatin remodeling factor              |
| Gon4L    | gon-4 like                                                       |
| Znf182   | zinc finger protein 182                                          |
| Ddx17    | DEAD-box helicase 17                                             |
| Srsf11   | serine and arginine rich splicing factor 11                      |
| Per2     | period circadian regulator 2                                     |
| Rnf169   | ring finger protein 169                                          |
| Kmt5C    | lysine methyltransferase 5C                                      |
| Zbtb40   | zinc finger and BTB domain containing 40                         |
| Clasrp   | CLK4 associating serine/arginine rich protein                    |
| Dot1L    | DOT1 like histone lysine methyltransferase                       |
| Rbak     | RB associated KRAB zinc finger                                   |
| Snrnp70  | small nuclear ribonucleoprotein U1 subunit 70                    |
| Brpf3    | bromodomain and PHD finger containing 3                          |
| Trerf1   | transcriptional regulating factor 1                              |
| Fbxl18   | F-box and leucine rich repeat protein 18                         |
| Cep152   | centrosomal protein 152                                          |
| Clk2     | CDC like kinase 2                                                |
| Clk2     | CDC like kinase 2                                                |
| Fgfr1Op  | FGFR1 oncogene partner                                           |
| Bicra    | BRD4 interacting chromatin remodeling complex associated protein |
| Ahnak2   | AHNAK nucleoprotein 2                                            |
| C4B      | complement C4B (Chido blood group)                               |
| C4A      | complement C4A (Rodgers blood group)                             |
| D2Hgdh   | D-2-hydroxyglutarate dehydrogenase                               |
| Sptbn5   | spectrin beta, non-erythrocytic 5                                |
| Zc3H3    | zinc finger CCCH-type containing 3                               |
| Plekhn1  | pleckstrin homology domain containing N1                         |
| Spaca6   | sperm acrosome associated 6                                      |
| Snhg15   | small nucleolar RNA host gene 15                                 |
| Snhg20   | small nucleolar RNA host gene 20                                 |
| Mir17Hg  | miR-17-92a-1 cluster host gene                                   |
| Neat1    | nuclear paraspeckle assembly transcript 1                        |
| Malat1   | metastasis associated lung adenocarcinoma transcript 1           |
| Meg8     | maternally expressed 8, small nucleolar RNA host gene            |
| Ms4A14   | membrane spanning 4-domains A14                                  |
| Kcnq1Ot1 | KCNQ1 opposite strand/antisense transcript 1                     |



**Table S8. Overlapping genes between Ldah and previously identified LXR targets in macrophages.**

| gene_id               | symbol   | Goo et al                     | Feldman et al.                  | Feldman et al.                             | Feldman et al.                  | Feldman et al.                            | Ramon-Vazquez et al.  |
|-----------------------|----------|-------------------------------|---------------------------------|--------------------------------------------|---------------------------------|-------------------------------------------|-----------------------|
|                       |          | Fold vs. THP-1 + DMSO         |                                 |                                            | Fold vs. THP-1 foam cells       |                                           | BMM                   |
|                       |          | Foam cells<br>Log2 FC (Tg/WT) | THP-1 + T0901317<br>Fold Change | THP-1 foam cells + T0901317<br>Fold Change | THP-1 foam cells<br>Fold Change | THP-1 foam cell + T0901317<br>Fold Change | GW 3965<br>LXR target |
| ENSMUSG00000031098.18 | Syt8     | 1.23291                       | -                               | -                                          | -                               | -                                         | Yes                   |
| ENSMUSG00000066975.12 | Cryba4   | 0.848567                      | -                               | -                                          | -                               | -                                         | Yes                   |
| ENSMUSG00000002100.15 | Mybpc3   | 0.801451                      | -                               | -                                          | 3.55                            | -                                         | -                     |
| ENSMUSG00000045282.7  | Tmem86b  | 0.680165                      | -                               | 2.08                                       | -                               | -                                         | -                     |
| ENSMUSG00000027239.14 | Mdk      | 0.680099                      | -                               | -                                          | -                               | -                                         | Yes                   |
| ENSMUSG00000040663.8  | Clcf1    | 0.579513                      | -                               | -                                          | 4.32                            | -                                         | -                     |
| ENSMUSG00000073609.9  | D2hgdh   | 0.57739                       | -                               | 2.15                                       | 2.28                            | -                                         | -                     |
| ENSMUSG00000008200.14 | Fnbp4    | 0.559785                      | -                               | 2.47                                       | 1.67                            | -                                         | -                     |
| ENSMUSG00000032198.8  | Dock6    | 0.552541                      | -                               | 6.55                                       | 3.47*                           | -                                         | -                     |
| ENSMUSG00000050737.13 | Ptges    | 0.488789                      | -                               | 7.91                                       | 10.45                           | -                                         | -                     |
| ENSMUSG00000021910.15 | Nisch    | 0.476426                      | 0.76                            | -                                          | -                               | -                                         | -                     |
| ENSMUSG00000031389.17 | Arhgap4  | 0.471822                      | 0.77                            | 0.57                                       | -                               | -                                         | -                     |
| ENSMUSG00000044813.15 | Shb      | 0.467815                      | -                               | 3.04                                       | 1.87                            | -                                         | Yes                   |
| ENSMUSG00000055866.9  | Per2     | 0.464561                      | -                               | -                                          | -                               | -                                         | Yes                   |
| ENSMUSG00000009741.14 | Ubp1     | 0.433344                      | 1.28                            | -                                          | -                               | -                                         | -                     |
| ENSMUSG00000006395.16 | Hyi      | 0.429045                      | -                               | 2.23                                       | 1.97                            | -                                         | -                     |
| ENSMUSG00000023952.13 | Gtpbbp2  | 0.41292                       | -                               | 3.84                                       | -                               | -                                         | -                     |
| ENSMUSG00000041235.11 | Chd7     | 0.404886                      | 1.32                            | -                                          | -                               | -                                         | -                     |
| ENSMUSG00000031295.13 | Phka2    | 0.393297                      | -                               | -                                          | 3.36                            | -                                         | -                     |
| ENSMUSG00000001173.15 | Ocrl     | 0.391173                      | -                               | -                                          | 2.14                            | -                                         | -                     |
| ENSMUSG00000033819.15 | Ppp1r16a | 0.390599                      | -                               | -                                          | 4.45*                           | -                                         | -                     |
| ENSMUSG00000042349.13 | lkbke    | 0.378942                      | -                               | -                                          | 0.51                            | -                                         | Yes                   |
| ENSMUSG00000024193.7  | Phf1     | 0.359026                      | -                               | 5.15                                       | 2.32                            | 2.48                                      | -                     |
| ENSMUSG00000038351.14 | Sgsm2    | 0.329184                      | -                               | -                                          | 1.95                            | -                                         | -                     |
| ENSMUSG00000025158.7  | Rfng     | 0.324318                      | -                               | -                                          | 1.9                             | -                                         | -                     |
| ENSMUSG00000037221.13 | Mospd3   | 0.31899                       | -                               | -                                          | 0.42                            | -                                         | -                     |
| ENSMUSG00000026544.6  | Dusp23   | 0.29605                       | -                               | 0.59                                       | -                               | 0.56                                      | -                     |
| ENSMUSG0000001918.17  | Slc1a5   | 0.292262                      | -                               | 5.03                                       | 5.39*                           | -                                         | -                     |
| ENSMUSG00000029817.11 | Tra2a    | 0.291                         | -                               | -                                          | 0.36                            | -                                         | -                     |
| ENSMUSG00000025144.17 | Stra13   | 0.288484                      | -                               | 0.51*                                      | 0.57*                           | -                                         | -                     |
| ENSMUSG00000024856.10 | Cdk2ap2  | 0.287504                      | -                               | 0.46*                                      | 0.42                            | -                                         | -                     |
| ENSMUSG00000041781.8  | Cpsf2    | -0.260727                     | -                               | -                                          | 1.68                            | -                                         | -                     |
| ENSMUSG00000041958.10 | Pigs     | -0.262644                     | -                               | -                                          | 0.5                             | -                                         | -                     |
| ENSMUSG00000027775.9  | Mfsd1    | -0.26537                      | -                               | 0.29                                       | 0.33                            | -                                         | -                     |
| ENSMUSG00000050912.15 | Tmem123  | -0.269675                     | 1.32*                           | -                                          | -                               | -                                         | -                     |
| ENSMUSG00000022912.8  | Pros1    | -0.270499                     | -                               | -                                          | 0.57*                           | -                                         | -                     |
| ENSMUSG00000046841.4  | Ckap4    | -0.273775                     | 1.26                            | 2.54*                                      | 1.97                            | -                                         | -                     |
| ENSMUSG00000031165.6  | Was      | -0.274809                     | -                               | 0.55*                                      | 0.46*                           | -                                         | -                     |
| ENSMUSG00000021108.17 | Prkch    | -0.275429                     | -                               | 4.98*                                      | 3.63*                           | -                                         | -                     |
| ENSMUSG00000031337.16 | Mtm1     | -0.277104                     | -                               | -                                          | -                               | -                                         | Yes                   |
| ENSMUSG00000020075.7  | Ddx21    | -0.279205                     | 1.47*                           | -                                          | -                               | -                                         | -                     |

|                       |          |           |       |       |       |       |     |
|-----------------------|----------|-----------|-------|-------|-------|-------|-----|
| ENSMUSG00000011179.7  | Odc1     | -0.289525 | -     | 0.46  | 0.55  | -     | -   |
| ENSMUSG00000032763.10 | llyesbl  | -0.290879 | -     | -     | -     | -     | Yes |
| ENSMUSG00000030220.13 | Arhgdb   | -0.290993 | -     | 0.24  | 0.3   | -     | -   |
| ENSMUSG00000032349.13 | EloYesl5 | -0.29941  | 1.97* | -     | -     | -     | Yes |
| ENSMUSG00000026223.15 | lrm2c    | -0.301775 | 0.8   | -     | 0.53  | -     | -   |
| ENSMUSG00000068798.10 | Rap1a    | -0.30521  | -     | -     | -     | -     | Yes |
| ENSMUSG00000049516.9  | Spty2d1  | -0.310043 | -     | 0.38  | 0.39  | -     | -   |
| ENSMUSG00000029998.14 | Pcyox1   | -0.311046 | -     | -     | -     | -     | Yes |
| ENSMUSG00000032050.16 | Rdx      | -0.311564 | -     | 2.34  | -     | -     | -   |
| ENSMUSG00000020841.5  | Cpd      | -0.313264 | -     | 2.18* | 2.21  | -     | -   |
| ENSMUSG00000022664.11 | Slc35a5  | -0.324119 | -     | 0.53  | -     | -     | -   |
| ENSMUSG00000029338.13 | Antxr2   | -0.324286 | -     | 0.2   | 0.29  | -     | -   |
| ENSMUSG00000020130.8  | Tbc1d15  | -0.324594 | -     | 2.32* | -     | -     | -   |
| ENSMUSG00000079037.9  | Prnp     | -0.329665 | 1.33  | 3.29* | 2.00* | -     | -   |
| ENSMUSG00000025203.5  | Scd2     | -0.332794 | -     | -     | -     | -     | Yes |
| ENSMUSG00000027195.10 | Hsd17b12 | -0.337639 | -     | -     | 1.84  | -     | -   |
| ENSMUSG00000035847.15 | lds      | -0.341298 | -     | 0.51* | 0.47* | -     | -   |
| ENSMUSG00000029672.16 | Fam3c    | -0.352147 | -     | -     | -     | -     | Yes |
| ENSMUSG0000003721.14  | Insig2   | -0.35411  | -     | -     | 0.52* | -     | -   |
| ENSMUSG00000031007.2  | Atp6ap2  | -0.3555   | -     | 0.52  | 0.46  | -     | -   |
| ENSMUSG00000032475.15 | Nck1     | -0.355867 | -     | 0.42* | 0.46* | -     | -   |
| ENSMUSG00000029426.8  | Scarb2   | -0.364799 | -     | -     | -     | -     | Yes |
| ENSMUSG00000033863.1  | Klf9     | -0.368354 | -     | 2.11* | 2.21* | -     | -   |
| ENSMUSG00000020048.13 | Hsp90b1  | -0.371044 | -     | 0.50* | 0.4   | -     | -   |
| ENSMUSG00000062070.12 | Pgk1     | -0.373352 | -     | 0.41  | 0.53  | -     | -   |
| ENSMUSG00000037071.2  | Scd1     | -0.37379  | -     | -     | -     | -     | Yes |
| ENSMUSG00000022257.3  | Laptm4b  | -0.374818 | -     | -     | 0.47* | -     | -   |
| ENSMUSG00000015854.7  | Cd5l     | -0.375955 | -     | -     | -     | -     | Yes |
| ENSMUSG00000029767.16 | Calu     | -0.380567 | -     | 2.00* | -     | -     | -   |
| ENSMUSG00000072235.5  | Tuba1a   | -0.38428  | -     | 0.3   | 0.38  | -     | -   |
| ENSMUSG00000030786.18 | ltgam    | -0.384339 | -     | 0.38  | 0.38  | -     | -   |
| ENSMUSG00000030208.15 | Emp1     | -0.386647 | -     | -     | 1.93  | -     | -   |
| ENSMUSG00000017057.9  | lly13ra1 | -0.39076  | -     | -     | 0.45  | -     | -   |
| ENSMUSG00000030096.8  | Slc6a6   | -0.394469 | -     | 4.25* | 3.93  | -     | -   |
| ENSMUSG00000028111.4  | Ctsk     | -0.397706 | -     | 3.73  | -     | -     | -   |
| ENSMUSG00000071855.4  | Ccdc112  | -0.400304 | -     | 0.35  | -     | -     | -   |
| ENSMUSG00000078945.10 | Naip2    | -0.401369 | -     | -     | -     | -     | Yes |
| ENSMUSG00000021190.14 | Lgmn     | -0.404262 | 0.72* | 0.19* | -     | -     | -   |
| ENSMUSG00000045092.8  | S1pr1    | -0.436563 | -     | -     | -     | -     | Yes |
| ENSMUSG00000020571.12 | Pdia6    | -0.441169 | -     | 0.37  | 0.4   | -     | -   |
| ENSMUSG00000026986.14 | Hnmt     | -0.45104  | -     | 0.74  | -     | -     | -   |
| ENSMUSG00000026864.13 | Hspa5    | -0.45858  | -     | -     | 0.56* | -     | -   |
| ENSMUSG00000028270.12 | Gbp2     | -0.460988 | -     | -     | 0.17  | 5.85* | -   |
| ENSMUSG00000042684.8  | Npl      | -0.469555 | 0.72  | 0.54  | -     | -     | -   |
| ENSMUSG00000022351.14 | Sqle     | -0.471421 | 1.59  | 0.38  | 0.25  | -     | -   |
| ENSMUSG00000053253.16 | Ndfip2   | -0.471635 | -     | 0.58* | 0.52  | -     | -   |
| ENSMUSG00000020368.15 | Canx     | -0.481378 | -     | -     | 0.47  | -     | -   |
| ENSMUSG00000025016.10 | Tm9sf3   | -0.489441 | -     | -     | 0.51  | -     | -   |

|                        |         |           |      |       |       |      |     |
|------------------------|---------|-----------|------|-------|-------|------|-----|
| ENSMUSG00000028563.16  | Tm2d1   | -0.537236 | -    | -     | 1.85* | -    | -   |
| ENSMUSG00000019872.13  | Smpdl3a | -0.569659 | 4.03 | -     | -     | -    | -   |
| ENSMUSG00000023845.6   | Lnpep   | -0.593034 | -    | -     | -     | -    | Yes |
| ENSMUSG00000002944.15  | Cd36    | -0.629375 | 1.27 | -     | 1.84  | -    | -   |
| ENSMUSG000000060703.12 | Cd302   | -0.701273 | -    | -     | -     | -    | Yes |
| ENSMUSG00000014905.3   | Dnajb9  | -0.744725 | -    | 2.63  | -     | 2.02 | -   |
| ENSMUSG000000067714.13 | Lpar5   | -0.84304  | -    | -     | 0.14  | -    | -   |
| ENSMUSG00000079625.2   | Tm4sf19 | -0.862598 | 1.37 | -     | -     | -    | -   |
| ENSMUSG00000079685.9   | Ulbp1   | -0.895772 | -    | 3.35* | 3.53  | -    | -   |

\* : LXR knockdown sensitive

**Table S9.** Two-tailed Pearson's correlation of LDAH with other genes in arterial leukocytes.

| <b>Feature ID</b> | <b>P-value (Ldah)</b> | <b>FDR step up (Ldah)</b> | <b>Partial correlation (Ldah)</b> |
|-------------------|-----------------------|---------------------------|-----------------------------------|
| Syng1             | 1.34E-17              | 8.83E-14                  | 1.26E-01                          |
| Tmem256           | 1.65E-17              | 8.83E-14                  | 1.25E-01                          |
| Mfge8             | 1.12E-16              | 4.47E-13                  | 1.22E-01                          |
| Mlf2              | 1.45E-16              | 4.64E-13                  | 1.22E-01                          |
| 2010111I01Rik     | 2.22E-16              | 5.93E-13                  | 1.21E-01                          |
| Atp6v0d2          | 3.06E-16              | 7.01E-13                  | 1.20E-01                          |
| Clu               | 4.02E-16              | 7.62E-13                  | 1.20E-01                          |
| Degs1             | 4.28E-16              | 7.62E-13                  | 1.20E-01                          |
| Lum               | 7.61E-16              | 1.22E-12                  | 1.19E-01                          |
| Acta2             | 1.17E-15              | 1.70E-12                  | 1.18E-01                          |
| Nr1h3             | 1.50E-15              | 1.92E-12                  | 1.17E-01                          |
| Gpnmb             | 1.64E-15              | 1.92E-12                  | 1.17E-01                          |
| Uap111            | 1.67E-15              | 1.92E-12                  | 1.17E-01                          |
| Rcan2             | 2.53E-15              | 2.70E-12                  | 1.16E-01                          |
| Lrrc58            | 2.71E-15              | 2.71E-12                  | 1.16E-01                          |
| Amfr              | 5.47E-15              | 5.16E-12                  | 1.15E-01                          |
| Cmas              | 6.42E-15              | 5.71E-12                  | 1.15E-01                          |
| Polr2l            | 6.83E-15              | 5.76E-12                  | 1.15E-01                          |
| Ptp1b             | 7.87E-15              | 6.30E-12                  | 1.14E-01                          |
| Morf4l2           | 1.01E-14              | 7.22E-12                  | 1.14E-01                          |
| Spcs1             | 1.04E-14              | 7.22E-12                  | 1.14E-01                          |
| Igf2r             | 1.25E-14              | 8.35E-12                  | 1.13E-01                          |
| Vat1              | 1.41E-14              | 9.06E-12                  | 1.13E-01                          |
| Igfbp7            | 1.50E-14              | 9.21E-12                  | 1.13E-01                          |
| Gyg               | 1.89E-14              | 1.12E-11                  | 1.13E-01                          |
| Ahnak2            | 2.59E-14              | 1.40E-11                  | 1.12E-01                          |
| Acads             | 2.62E-14              | 1.40E-11                  | 1.12E-01                          |
| Mgp               | 3.61E-14              | 1.85E-11                  | 1.11E-01                          |
| Oxct1             | 3.69E-14              | 1.85E-11                  | 1.11E-01                          |
| Mmp12             | 4.10E-14              | 1.99E-11                  | 1.11E-01                          |
| Nagk              | 4.51E-14              | 2.13E-11                  | 1.11E-01                          |
| Fam198b           | 4.71E-14              | 2.15E-11                  | 1.11E-01                          |
| Mrpl18            | 5.05E-14              | 2.24E-11                  | 1.11E-01                          |
| Il7r              | 6.06E-14              | 2.62E-11                  | 1.10E-01                          |
| Cd5l              | 6.43E-14              | 2.64E-11                  | 1.10E-01                          |
| Mrpl27            | 9.58E-14              | 3.83E-11                  | 1.10E-01                          |
| Hebp1             | 1.10E-13              | 4.19E-11                  | 1.09E-01                          |
| Fabp5             | 1.14E-13              | 4.21E-11                  | 1.09E-01                          |
| Nkiras2           | 1.16E-13              | 4.21E-11                  | 1.09E-01                          |
| Myl9              | 1.35E-13              | 4.79E-11                  | 1.09E-01                          |
| Tagln             | 1.66E-13              | 5.78E-11                  | 1.09E-01                          |
| Tm4sf1            | 2.13E-13              | 7.16E-11                  | 1.08E-01                          |

|         |          |          |          |
|---------|----------|----------|----------|
| Myh11   | 2.15E-13 | 7.16E-11 | 1.08E-01 |
| Anxa4   | 2.31E-13 | 7.56E-11 | 1.08E-01 |
| Bgn     | 2.76E-13 | 8.84E-11 | 1.08E-01 |
| Olfml3  | 2.86E-13 | 8.98E-11 | 1.07E-01 |
| Col1a2  | 3.61E-13 | 1.11E-10 | 1.07E-01 |
| Fam129b | 3.83E-13 | 1.16E-10 | 1.07E-01 |
| Rnf7    | 3.92E-13 | 1.16E-10 | 1.07E-01 |
| Higd1a  | 4.30E-13 | 1.25E-10 | 1.07E-01 |
| Pam     | 4.97E-13 | 1.41E-10 | 1.06E-01 |
| Cops7a  | 5.01E-13 | 1.41E-10 | 1.06E-01 |
| N6amt2  | 5.29E-13 | 1.46E-10 | 1.06E-01 |
| Sparc   | 6.23E-13 | 1.69E-10 | 1.06E-01 |
| Ctsd    | 6.45E-13 | 1.72E-10 | 1.06E-01 |
| Fblim1  | 6.54E-13 | 1.72E-10 | 1.06E-01 |
| Lpl     | 8.28E-13 | 2.13E-10 | 1.05E-01 |
| Mrps23  | 8.39E-13 | 2.13E-10 | 1.05E-01 |
| Gng12   | 8.82E-13 | 2.21E-10 | 1.05E-01 |
| Rab1a   | 9.70E-13 | 2.39E-10 | 1.05E-01 |
| Dusp3   | 1.00E-12 | 2.43E-10 | 1.05E-01 |
| Csrp2   | 1.02E-12 | 2.43E-10 | 1.05E-01 |
| Trem2   | 1.06E-12 | 2.49E-10 | 1.05E-01 |
| Col3a1  | 1.14E-12 | 2.65E-10 | 1.05E-01 |
| Tmed3   | 1.24E-12 | 2.84E-10 | 1.05E-01 |
| Cyb5r3  | 1.37E-12 | 3.09E-10 | 1.04E-01 |
| Chmp3   | 1.45E-12 | 3.23E-10 | 1.04E-01 |
| Tpm2    | 1.56E-12 | 3.42E-10 | 1.04E-01 |
| PsmD6   | 1.65E-12 | 3.58E-10 | 1.04E-01 |
| Tpm1    | 1.71E-12 | 3.64E-10 | 1.04E-01 |
| Tmem147 | 1.85E-12 | 3.89E-10 | 1.04E-01 |
| Wbp5    | 1.93E-12 | 4.01E-10 | 1.04E-01 |
| Dnajc19 | 2.17E-12 | 4.45E-10 | 1.03E-01 |
| Man1a2  | 2.25E-12 | 4.57E-10 | 1.03E-01 |
| Pld3    | 2.29E-12 | 4.58E-10 | 1.03E-01 |
| Cltb    | 2.34E-12 | 4.58E-10 | 1.03E-01 |
| Speg    | 2.37E-12 | 4.58E-10 | 1.03E-01 |
| Arl2    | 2.39E-12 | 4.58E-10 | 1.03E-01 |
| Atp5f1  | 2.40E-12 | 4.58E-10 | 1.03E-01 |
| Slc38a7 | 2.43E-12 | 4.58E-10 | 1.03E-01 |
| Napa    | 2.87E-12 | 5.29E-10 | 1.03E-01 |
| Eln     | 2.88E-12 | 5.29E-10 | 1.03E-01 |
| Elovl1  | 2.97E-12 | 5.41E-10 | 1.03E-01 |
| Cnn1    | 3.14E-12 | 5.64E-10 | 1.03E-01 |
| Sucla2  | 3.23E-12 | 5.75E-10 | 1.03E-01 |
| Gtf3a   | 3.42E-12 | 6.02E-10 | 1.02E-01 |

|           |          |          |           |
|-----------|----------|----------|-----------|
| Nrp2      | 3.66E-12 | 6.28E-10 | 1.02E-01  |
| Pcp4l1    | 3.67E-12 | 6.28E-10 | 1.02E-01  |
| Capg      | 3.72E-12 | 6.28E-10 | 1.02E-01  |
| Itgav     | 3.88E-12 | 6.47E-10 | 1.02E-01  |
| Gsk3b     | 4.05E-12 | 6.69E-10 | 1.02E-01  |
| Dcn       | 4.15E-12 | 6.75E-10 | 1.02E-01  |
| Tnfsf12   | 4.18E-12 | 6.75E-10 | 1.02E-01  |
| Exosc4    | 4.22E-12 | 6.75E-10 | 1.02E-01  |
| Mfsd11    | 4.49E-12 | 7.12E-10 | 1.02E-01  |
| Uggt1     | 4.57E-12 | 7.15E-10 | 1.02E-01  |
| Arl11     | 4.60E-12 | 7.15E-10 | 1.02E-01  |
| Bcar3     | 5.45E-12 | 8.37E-10 | 1.02E-01  |
| Arl8b     | 5.49E-12 | 8.37E-10 | 1.01E-01  |
| Myd8f     | 5.54E-12 | 8.37E-10 | 1.01E-01  |
| Serpina3n | 5.84E-12 | 8.73E-10 | 1.01E-01  |
| Mcf2d     | 6.52E-12 | 9.67E-10 | 1.01E-01  |
| Tspan4    | 6.92E-12 | 9.99E-10 | 1.01E-01  |
| Mrpl51    | 7.27E-12 | 1.04E-09 | 1.01E-01  |
| Cisd1     | 7.31E-12 | 1.04E-09 | 1.01E-01  |
| Cyc1      | 7.43E-12 | 1.04E-09 | 1.01E-01  |
| Mgat5     | 8.08E-12 | 1.12E-09 | 1.01E-01  |
| Gm10020   | 8.21E-12 | 1.13E-09 | 1.01E-01  |
| Ngfrap1   | 8.32E-12 | 1.14E-09 | 1.01E-01  |
| Gadd45a   | 8.46E-12 | 1.15E-09 | 1.01E-01  |
| Spp1      | 8.75E-12 | 1.18E-09 | 1.01E-01  |
| Pgp       | 9.69E-12 | 1.29E-09 | 1.00E-01  |
| Ufm1      | 1.03E-11 | 1.36E-09 | 1.00E-01  |
| Slc27a1   | 1.04E-11 | 1.36E-09 | 1.00E-01  |
| Trappc6b  | 1.10E-11 | 1.44E-09 | 1.00E-01  |
| Rxra      | 1.19E-11 | 1.53E-09 | 9.99E-02  |
| Apoe      | 1.21E-11 | 1.55E-09 | -9.98E-02 |
| Plekhb2   | 1.22E-11 | 1.55E-09 | 9.98E-02  |
| Tmem65    | 1.36E-11 | 1.69E-09 | 9.96E-02  |
| Arpc5l    | 1.38E-11 | 1.69E-09 | 9.96E-02  |
| Col1a1    | 1.38E-11 | 1.69E-09 | 9.96E-02  |
| Gm4799    | 1.47E-11 | 1.78E-09 | 9.94E-02  |
| Mff       | 1.52E-11 | 1.80E-09 | 9.94E-02  |
| Glg1      | 1.52E-11 | 1.80E-09 | 9.93E-02  |
| Gclm      | 1.53E-11 | 1.80E-09 | 9.93E-02  |
| Ldlrap1   | 1.53E-11 | 1.80E-09 | 9.93E-02  |
| Scd2      | 1.54E-11 | 1.80E-09 | 9.93E-02  |
| Hacd1     | 1.55E-11 | 1.80E-09 | 9.93E-02  |
| Dtnbp1    | 1.60E-11 | 1.84E-09 | 9.92E-02  |
| Gdpd1     | 1.83E-11 | 2.09E-09 | 9.90E-02  |

|           |          |          |          |
|-----------|----------|----------|----------|
| Vti1b     | 2.02E-11 | 2.28E-09 | 9.87E-02 |
| Dap       | 2.03E-11 | 2.28E-09 | 9.87E-02 |
| Ctsb      | 2.06E-11 | 2.28E-09 | 9.87E-02 |
| Timm13    | 2.08E-11 | 2.28E-09 | 9.87E-02 |
| Nucb1     | 2.09E-11 | 2.28E-09 | 9.87E-02 |
| Ankrd40   | 2.10E-11 | 2.28E-09 | 9.87E-02 |
| Itfg1     | 2.86E-11 | 3.07E-09 | 9.80E-02 |
| Atp6v1a   | 3.08E-11 | 3.29E-09 | 9.78E-02 |
| Ak6       | 3.19E-11 | 3.38E-09 | 9.78E-02 |
| Gpr137b   | 3.35E-11 | 3.53E-09 | 9.77E-02 |
| Ctsk      | 3.89E-11 | 4.05E-09 | 9.73E-02 |
| Emc4      | 3.94E-11 | 4.07E-09 | 9.73E-02 |
| Tmem205   | 3.99E-11 | 4.10E-09 | 9.73E-02 |
| Gstm1     | 4.22E-11 | 4.30E-09 | 9.72E-02 |
| Creg1     | 4.39E-11 | 4.45E-09 | 9.71E-02 |
| Fzd2      | 4.46E-11 | 4.49E-09 | 9.70E-02 |
| Socs6     | 4.82E-11 | 4.82E-09 | 9.69E-02 |
| Mrpl36    | 4.95E-11 | 4.92E-09 | 9.68E-02 |
| Actn1     | 5.02E-11 | 4.96E-09 | 9.68E-02 |
| Sost      | 5.07E-11 | 4.98E-09 | 9.68E-02 |
| Minos1    | 5.41E-11 | 5.25E-09 | 9.66E-02 |
| Naa20     | 5.48E-11 | 5.29E-09 | 9.66E-02 |
| Blnk      | 5.74E-11 | 5.48E-09 | 9.65E-02 |
| Mrpl40    | 5.75E-11 | 5.48E-09 | 9.65E-02 |
| Gng11     | 5.78E-11 | 5.48E-09 | 9.65E-02 |
| Ykt6      | 6.28E-11 | 5.92E-09 | 9.63E-02 |
| Rnf128    | 6.36E-11 | 5.95E-09 | 9.63E-02 |
| Metap2    | 6.66E-11 | 6.20E-09 | 9.62E-02 |
| Emp1      | 7.25E-11 | 6.71E-09 | 9.60E-02 |
| Serpinb6a | 7.47E-11 | 6.87E-09 | 9.59E-02 |
| Commd9    | 7.58E-11 | 6.94E-09 | 9.59E-02 |
| Sod3      | 7.75E-11 | 7.05E-09 | 9.58E-02 |
| Fn1       | 8.32E-11 | 7.53E-09 | 9.57E-02 |
| Glrx5     | 8.58E-11 | 7.72E-09 | 9.56E-02 |
| Mrps17    | 8.70E-11 | 7.78E-09 | 9.56E-02 |
| Mrpl34    | 9.02E-11 | 7.99E-09 | 9.55E-02 |
| Col4a1    | 9.10E-11 | 8.01E-09 | 9.55E-02 |
| Arl6ip5   | 9.43E-11 | 8.21E-09 | 9.54E-02 |
| Il11ra1   | 9.76E-11 | 8.40E-09 | 9.53E-02 |
| Gusb      | 9.94E-11 | 8.52E-09 | 9.53E-02 |
| Sf3b5     | 1.02E-10 | 8.68E-09 | 9.52E-02 |
| Fkrp      | 1.03E-10 | 8.71E-09 | 9.52E-02 |
| Vapb      | 1.06E-10 | 8.87E-09 | 9.51E-02 |
| Rnf4      | 1.14E-10 | 9.45E-09 | 9.50E-02 |

|          |          |          |          |
|----------|----------|----------|----------|
| Surf4    | 1.15E-10 | 9.47E-09 | 9.50E-02 |
| Fam162a  | 1.15E-10 | 9.48E-09 | 9.49E-02 |
| Bola3    | 1.18E-10 | 9.59E-09 | 9.49E-02 |
| Glmf     | 1.18E-10 | 9.59E-09 | 9.49E-02 |
| Fbxo32   | 1.28E-10 | 1.04E-08 | 9.47E-02 |
| Cpe      | 1.37E-10 | 1.10E-08 | 9.46E-02 |
| Pdzd11   | 1.41E-10 | 1.13E-08 | 9.45E-02 |
| Tpp1     | 1.44E-10 | 1.14E-08 | 9.45E-02 |
| Tmx2     | 1.50E-10 | 1.18E-08 | 9.44E-02 |
| Pno1     | 1.55E-10 | 1.21E-08 | 9.43E-02 |
| Hist1h1c | 1.62E-10 | 1.26E-08 | 9.42E-02 |
| Psmb5    | 1.66E-10 | 1.28E-08 | 9.41E-02 |
| Psmd12   | 1.67E-10 | 1.28E-08 | 9.41E-02 |
| Ogdh     | 1.70E-10 | 1.29E-08 | 9.41E-02 |
| Knop1    | 1.74E-10 | 1.32E-08 | 9.40E-02 |
| Dda1     | 1.78E-10 | 1.34E-08 | 9.40E-02 |
| Mrps34   | 1.83E-10 | 1.38E-08 | 9.39E-02 |
| Lrp1     | 1.89E-10 | 1.41E-08 | 9.38E-02 |
| Myo1c    | 1.91E-10 | 1.42E-08 | 9.38E-02 |
| Atic     | 1.93E-10 | 1.43E-08 | 9.38E-02 |
| Gpr180   | 2.01E-10 | 1.48E-08 | 9.37E-02 |
| Srp19    | 2.07E-10 | 1.52E-08 | 9.36E-02 |
| Pcnp     | 2.11E-10 | 1.53E-08 | 9.36E-02 |
| Cab39    | 2.16E-10 | 1.57E-08 | 9.35E-02 |
| Mrpl17   | 2.21E-10 | 1.59E-08 | 9.35E-02 |
| Atraid   | 2.22E-10 | 1.59E-08 | 9.35E-02 |
| Psmd1    | 2.33E-10 | 1.67E-08 | 9.34E-02 |
| Pdha1    | 2.42E-10 | 1.72E-08 | 9.33E-02 |
| Nubp2    | 2.49E-10 | 1.76E-08 | 9.32E-02 |
| Fam20c   | 2.50E-10 | 1.76E-08 | 9.32E-02 |
| Pank3    | 2.56E-10 | 1.80E-08 | 9.32E-02 |
| Pgam1    | 2.68E-10 | 1.86E-08 | 9.31E-02 |
| Ssr2     | 2.71E-10 | 1.88E-08 | 9.30E-02 |
| Tmem208  | 2.88E-10 | 1.97E-08 | 9.29E-02 |
| Sep15    | 3.02E-10 | 2.06E-08 | 9.28E-02 |
| Yipf4    | 3.08E-10 | 2.09E-08 | 9.27E-02 |
| Nme6     | 3.09E-10 | 2.09E-08 | 9.27E-02 |
| Wdr83os  | 3.24E-10 | 2.17E-08 | 9.26E-02 |
| Mid1     | 3.28E-10 | 2.19E-08 | 9.26E-02 |
| Ube2m    | 3.36E-10 | 2.23E-08 | 9.25E-02 |
| Lpcat3   | 3.43E-10 | 2.27E-08 | 9.25E-02 |
| Mrpl44   | 3.46E-10 | 2.28E-08 | 9.25E-02 |
| Rwdd1    | 3.51E-10 | 2.30E-08 | 9.24E-02 |
| Ubxn6    | 3.54E-10 | 2.32E-08 | 9.24E-02 |



|               |          |          |          |
|---------------|----------|----------|----------|
| Dnajc15       | 3.58E-10 | 2.33E-08 | 9.24E-02 |
| Immp1l        | 3.60E-10 | 2.33E-08 | 9.24E-02 |
| Rnf5          | 3.65E-10 | 2.36E-08 | 9.23E-02 |
| BC031181      | 3.88E-10 | 2.47E-08 | 9.22E-02 |
| Rab10         | 4.07E-10 | 2.55E-08 | 9.21E-02 |
| Osbpl8        | 4.08E-10 | 2.55E-08 | 9.21E-02 |
| Mgst1         | 4.17E-10 | 2.60E-08 | 9.20E-02 |
| Serpinh1      | 4.22E-10 | 2.62E-08 | 9.20E-02 |
| Apbb2         | 4.32E-10 | 2.65E-08 | 9.20E-02 |
| Ndufa10       | 4.43E-10 | 2.70E-08 | 9.19E-02 |
| Mlec          | 4.51E-10 | 2.71E-08 | 9.19E-02 |
| Purb          | 4.51E-10 | 2.71E-08 | 9.19E-02 |
| Cyfp1         | 4.61E-10 | 2.75E-08 | 9.18E-02 |
| Wisp2         | 4.63E-10 | 2.76E-08 | 9.18E-02 |
| Timm8b        | 4.81E-10 | 2.84E-08 | 9.17E-02 |
| Commd2        | 4.83E-10 | 2.84E-08 | 9.17E-02 |
| Ndufc1        | 4.83E-10 | 2.84E-08 | 9.17E-02 |
| U2af1l4       | 4.92E-10 | 2.89E-08 | 9.17E-02 |
| Mmp3          | 4.99E-10 | 2.91E-08 | 9.16E-02 |
| AI427809      | 5.09E-10 | 2.96E-08 | 9.16E-02 |
| Lipa          | 5.16E-10 | 2.98E-08 | 9.16E-02 |
| Srp14         | 5.16E-10 | 2.98E-08 | 9.16E-02 |
| Ghitm         | 5.17E-10 | 2.98E-08 | 9.16E-02 |
| Rtn3          | 5.19E-10 | 2.98E-08 | 9.15E-02 |
| Echs1         | 5.20E-10 | 2.98E-08 | 9.15E-02 |
| Atp5g1        | 5.29E-10 | 3.02E-08 | 9.15E-02 |
| Slc6a8        | 5.40E-10 | 3.07E-08 | 9.15E-02 |
| Htr2b         | 5.43E-10 | 3.07E-08 | 9.14E-02 |
| Cetn3         | 5.72E-10 | 3.22E-08 | 9.13E-02 |
| Ndufs6        | 5.74E-10 | 3.22E-08 | 9.13E-02 |
| Hypk          | 5.80E-10 | 3.25E-08 | 9.13E-02 |
| Dpep2         | 6.05E-10 | 3.38E-08 | 9.12E-02 |
| Pdlim4        | 6.41E-10 | 3.55E-08 | 9.11E-02 |
| Cyt11         | 6.57E-10 | 3.63E-08 | 9.10E-02 |
| Tmem160       | 6.78E-10 | 3.71E-08 | 9.09E-02 |
| Slc25a51      | 6.78E-10 | 3.71E-08 | 9.09E-02 |
| Tmem86a       | 6.85E-10 | 3.73E-08 | 9.09E-02 |
| Ctsl          | 7.18E-10 | 3.88E-08 | 9.08E-02 |
| Dtymk         | 7.21E-10 | 3.88E-08 | 9.08E-02 |
| 1810037117Rik | 7.98E-10 | 4.26E-08 | 9.05E-02 |
| Pnkd          | 8.38E-10 | 4.44E-08 | 9.04E-02 |
| I7Rn6         | 8.61E-10 | 4.55E-08 | 9.04E-02 |
| Znrf1         | 8.72E-10 | 4.59E-08 | 9.03E-02 |
| Gpr137b-ps    | 8.80E-10 | 4.62E-08 | 9.03E-02 |

|          |          |          |          |
|----------|----------|----------|----------|
| Snx15    | 8.88E-10 | 4.65E-08 | 9.03E-02 |
| Smpdl3a  | 8.91E-10 | 4.65E-08 | 9.03E-02 |
| Scoc     | 8.99E-10 | 4.67E-08 | 9.03E-02 |
| Glb1     | 9.01E-10 | 4.67E-08 | 9.03E-02 |
| Eif5b    | 9.57E-10 | 4.94E-08 | 9.01E-02 |
| Cald1    | 9.65E-10 | 4.97E-08 | 9.01E-02 |
| Pebp1    | 1.01E-09 | 5.16E-08 | 9.00E-02 |
| Ppt2     | 1.01E-09 | 5.16E-08 | 9.00E-02 |
| Chmp2b   | 1.02E-09 | 5.18E-08 | 9.00E-02 |
| Postn    | 1.04E-09 | 5.26E-08 | 8.99E-02 |
| P4hb     | 1.04E-09 | 5.28E-08 | 8.99E-02 |
| Chmp6    | 1.07E-09 | 5.34E-08 | 8.99E-02 |
| Ndufa7   | 1.07E-09 | 5.34E-08 | 8.99E-02 |
| Dctn6    | 1.09E-09 | 5.43E-08 | 8.98E-02 |
| Pdgfa    | 1.09E-09 | 5.43E-08 | 8.98E-02 |
| Mocs2    | 1.10E-09 | 5.43E-08 | 8.98E-02 |
| Ecm1     | 1.10E-09 | 5.44E-08 | 8.98E-02 |
| Gde1     | 1.11E-09 | 5.45E-08 | 8.98E-02 |
| Sharpin  | 1.11E-09 | 5.46E-08 | 8.98E-02 |
| Eif6     | 1.12E-09 | 5.50E-08 | 8.97E-02 |
| Bag1     | 1.13E-09 | 5.52E-08 | 8.97E-02 |
| Psmd5    | 1.16E-09 | 5.63E-08 | 8.97E-02 |
| Nutf2    | 1.17E-09 | 5.67E-08 | 8.97E-02 |
| Ccdc91   | 1.21E-09 | 5.83E-08 | 8.96E-02 |
| Mrps33   | 1.22E-09 | 5.85E-08 | 8.95E-02 |
| Lat2     | 1.26E-09 | 6.01E-08 | 8.95E-02 |
| Atg5     | 1.27E-09 | 6.04E-08 | 8.95E-02 |
| Timm17b  | 1.28E-09 | 6.05E-08 | 8.94E-02 |
| Csrp1    | 1.28E-09 | 6.05E-08 | 8.94E-02 |
| Cyb5r4   | 1.29E-09 | 6.05E-08 | 8.94E-02 |
| Caprin1  | 1.30E-09 | 6.11E-08 | 8.94E-02 |
| Rassf3   | 1.34E-09 | 6.27E-08 | 8.93E-02 |
| Aebp1    | 1.34E-09 | 6.27E-08 | 8.93E-02 |
| Nip7     | 1.38E-09 | 6.44E-08 | 8.93E-02 |
| Wls      | 1.45E-09 | 6.70E-08 | 8.91E-02 |
| Mrpl4    | 1.49E-09 | 6.89E-08 | 8.91E-02 |
| Csf2rb2  | 1.54E-09 | 7.05E-08 | 8.90E-02 |
| Mpc2     | 1.57E-09 | 7.18E-08 | 8.90E-02 |
| Cd22     | 1.58E-09 | 7.19E-08 | 8.89E-02 |
| Ahcyl1   | 1.58E-09 | 7.20E-08 | 8.89E-02 |
| Epas1    | 1.61E-09 | 7.30E-08 | 8.89E-02 |
| Rab18    | 1.61E-09 | 7.30E-08 | 8.89E-02 |
| AY036118 | 1.63E-09 | 7.34E-08 | 8.89E-02 |
| Polr2j   | 1.64E-09 | 7.37E-08 | 8.88E-02 |

|               |          |          |          |
|---------------|----------|----------|----------|
| Commd3        | 1.69E-09 | 7.49E-08 | 8.88E-02 |
| Comtd1        | 1.69E-09 | 7.49E-08 | 8.88E-02 |
| Ckap4         | 1.69E-09 | 7.49E-08 | 8.88E-02 |
| Creb3l1       | 1.75E-09 | 7.69E-08 | 8.87E-02 |
| Kdelr1        | 1.75E-09 | 7.69E-08 | 8.87E-02 |
| Klc4          | 1.78E-09 | 7.78E-08 | 8.87E-02 |
| Phlda3        | 1.82E-09 | 7.94E-08 | 8.86E-02 |
| Sypl          | 1.84E-09 | 7.97E-08 | 8.86E-02 |
| Prdx4         | 1.84E-09 | 7.97E-08 | 8.86E-02 |
| Ssbp1         | 1.88E-09 | 8.13E-08 | 8.85E-02 |
| Sptssa        | 1.90E-09 | 8.17E-08 | 8.85E-02 |
| Msrbl1        | 1.92E-09 | 8.21E-08 | 8.85E-02 |
| Qdpr          | 1.93E-09 | 8.23E-08 | 8.85E-02 |
| Cpq           | 1.98E-09 | 8.42E-08 | 8.84E-02 |
| Mkl2          | 2.10E-09 | 8.88E-08 | 8.83E-02 |
| Mrps28        | 2.14E-09 | 8.98E-08 | 8.82E-02 |
| Rbp1          | 2.15E-09 | 8.99E-08 | 8.82E-02 |
| Sigmar1       | 2.16E-09 | 9.01E-08 | 8.82E-02 |
| Slc25a4       | 2.23E-09 | 9.29E-08 | 8.81E-02 |
| Copa          | 2.25E-09 | 9.32E-08 | 8.81E-02 |
| Psmc7         | 2.33E-09 | 9.60E-08 | 8.80E-02 |
| Fth1          | 2.43E-09 | 9.95E-08 | 8.79E-02 |
| Ostc          | 2.45E-09 | 1.00E-07 | 8.79E-02 |
| Cat           | 2.52E-09 | 1.02E-07 | 8.78E-02 |
| Tsfm          | 2.52E-09 | 1.02E-07 | 8.78E-02 |
| Ndufb6        | 2.55E-09 | 1.03E-07 | 8.78E-02 |
| Mpv17l2       | 2.68E-09 | 1.08E-07 | 8.77E-02 |
| Paox          | 2.71E-09 | 1.09E-07 | 8.77E-02 |
| 1110008F13Rik | 2.72E-09 | 1.09E-07 | 8.76E-02 |
| Spryd3        | 2.84E-09 | 1.13E-07 | 8.75E-02 |
| Mpc1          | 2.90E-09 | 1.15E-07 | 8.75E-02 |
| Tmem30a       | 2.91E-09 | 1.15E-07 | 8.75E-02 |
| Bola1         | 2.94E-09 | 1.16E-07 | 8.75E-02 |
| Timm17a       | 2.98E-09 | 1.18E-07 | 8.74E-02 |
| Acp2          | 3.03E-09 | 1.19E-07 | 8.74E-02 |
| Plgrkt        | 3.05E-09 | 1.20E-07 | 8.74E-02 |
| Iqsec1        | 3.10E-09 | 1.21E-07 | 8.73E-02 |
| Htra1         | 3.13E-09 | 1.22E-07 | 8.73E-02 |
| Alg3          | 3.17E-09 | 1.23E-07 | 8.73E-02 |
| Gm10269       | 3.21E-09 | 1.24E-07 | 8.72E-02 |
| Chchd10       | 3.23E-09 | 1.25E-07 | 8.72E-02 |
| Cdk4          | 3.35E-09 | 1.29E-07 | 8.71E-02 |
| Ap2s1         | 3.36E-09 | 1.29E-07 | 8.71E-02 |
| Timp3         | 3.42E-09 | 1.31E-07 | 8.71E-02 |

|               |          |          |          |
|---------------|----------|----------|----------|
| Bcas3         | 3.43E-09 | 1.31E-07 | 8.71E-02 |
| Ddx1          | 3.46E-09 | 1.32E-07 | 8.71E-02 |
| Glipr1        | 3.64E-09 | 1.37E-07 | 8.69E-02 |
| Smarcd1       | 3.67E-09 | 1.38E-07 | 8.69E-02 |
| Srsf6         | 3.68E-09 | 1.38E-07 | 8.69E-02 |
| Vdac2         | 3.70E-09 | 1.38E-07 | 8.69E-02 |
| Gga2          | 3.78E-09 | 1.41E-07 | 8.68E-02 |
| Cers2         | 3.84E-09 | 1.43E-07 | 8.68E-02 |
| Cebpzos       | 3.88E-09 | 1.44E-07 | 8.68E-02 |
| Bhlhe41       | 3.90E-09 | 1.44E-07 | 8.68E-02 |
| Slc48a1       | 3.93E-09 | 1.45E-07 | 8.68E-02 |
| Tex261        | 3.99E-09 | 1.47E-07 | 8.67E-02 |
| Mid1ip1       | 4.03E-09 | 1.48E-07 | 8.67E-02 |
| Tmem165       | 4.04E-09 | 1.48E-07 | 8.67E-02 |
| Ano6          | 4.06E-09 | 1.48E-07 | 8.67E-02 |
| Spsb4         | 4.06E-09 | 1.48E-07 | 8.67E-02 |
| Ttc1          | 4.07E-09 | 1.48E-07 | 8.67E-02 |
| Ttc7b         | 4.09E-09 | 1.48E-07 | 8.67E-02 |
| Samd8         | 4.16E-09 | 1.50E-07 | 8.66E-02 |
| Lamtor2       | 4.17E-09 | 1.50E-07 | 8.66E-02 |
| Fabp4         | 4.22E-09 | 1.51E-07 | 8.66E-02 |
| Eif3j2        | 4.30E-09 | 1.54E-07 | 8.65E-02 |
| Acox1         | 4.33E-09 | 1.54E-07 | 8.65E-02 |
| Pdrg1         | 4.34E-09 | 1.54E-07 | 8.65E-02 |
| Lrpap1        | 4.36E-09 | 1.55E-07 | 8.65E-02 |
| Med21         | 4.45E-09 | 1.57E-07 | 8.65E-02 |
| Sfr1          | 4.48E-09 | 1.58E-07 | 8.64E-02 |
| Fdx1l         | 4.51E-09 | 1.58E-07 | 8.64E-02 |
| Hsd17b4       | 4.59E-09 | 1.61E-07 | 8.64E-02 |
| Tmco1         | 4.70E-09 | 1.64E-07 | 8.63E-02 |
| Mrps24        | 5.01E-09 | 1.74E-07 | 8.62E-02 |
| Nras          | 5.06E-09 | 1.75E-07 | 8.61E-02 |
| Mfhas1        | 5.09E-09 | 1.75E-07 | 8.61E-02 |
| Sfrp2         | 5.10E-09 | 1.75E-07 | 8.61E-02 |
| Gm8973        | 5.11E-09 | 1.75E-07 | 8.61E-02 |
| Lamtor5       | 5.27E-09 | 1.80E-07 | 8.60E-02 |
| Gm10094       | 5.29E-09 | 1.80E-07 | 8.60E-02 |
| Gns           | 5.32E-09 | 1.81E-07 | 8.60E-02 |
| Atp2a2        | 5.36E-09 | 1.82E-07 | 8.60E-02 |
| 1110008P14Rik | 5.58E-09 | 1.88E-07 | 8.59E-02 |
| Mmp14         | 5.77E-09 | 1.93E-07 | 8.58E-02 |
| Tns3          | 5.86E-09 | 1.95E-07 | 8.58E-02 |
| Gba           | 5.87E-09 | 1.95E-07 | 8.58E-02 |
| Calm1         | 5.96E-09 | 1.98E-07 | 8.57E-02 |

|         |          |          |          |
|---------|----------|----------|----------|
| Srprb   | 6.03E-09 | 2.00E-07 | 8.57E-02 |
| Ctbp1   | 6.07E-09 | 2.01E-07 | 8.57E-02 |
| Rab11a  | 6.10E-09 | 2.01E-07 | 8.57E-02 |
| Pqlc2   | 6.23E-09 | 2.05E-07 | 8.56E-02 |
| Prdx1   | 6.39E-09 | 2.08E-07 | 8.56E-02 |
| Galns   | 6.46E-09 | 2.10E-07 | 8.55E-02 |
| Lpp     | 6.46E-09 | 2.10E-07 | 8.55E-02 |
| Nfic    | 6.55E-09 | 2.12E-07 | 8.55E-02 |
| Pkib    | 6.61E-09 | 2.13E-07 | 8.55E-02 |
| Gorasp2 | 6.63E-09 | 2.14E-07 | 8.55E-02 |
| Pdap1   | 6.65E-09 | 2.14E-07 | 8.55E-02 |
| Ubr4    | 6.74E-09 | 2.16E-07 | 8.54E-02 |
| Usf2    | 6.76E-09 | 2.16E-07 | 8.54E-02 |
| Ndufb9  | 6.84E-09 | 2.18E-07 | 8.54E-02 |
| Mgst3   | 6.85E-09 | 2.18E-07 | 8.54E-02 |
| Syne1   | 6.88E-09 | 2.18E-07 | 8.54E-02 |
| Sf3b4   | 7.07E-09 | 2.24E-07 | 8.53E-02 |
| Smim7   | 7.14E-09 | 2.26E-07 | 8.53E-02 |
| Foxk2   | 7.22E-09 | 2.27E-07 | 8.53E-02 |
| Nop10   | 7.43E-09 | 2.33E-07 | 8.52E-02 |
| Nptn    | 7.91E-09 | 2.47E-07 | 8.50E-02 |
| Hibadh  | 8.03E-09 | 2.50E-07 | 8.50E-02 |
| Mrpl41  | 8.08E-09 | 2.51E-07 | 8.50E-02 |
| Phf5a   | 8.19E-09 | 2.54E-07 | 8.50E-02 |
| Jtb     | 8.24E-09 | 2.55E-07 | 8.49E-02 |
| Rai14   | 8.45E-09 | 2.60E-07 | 8.49E-02 |
| Mfsd12  | 8.54E-09 | 2.62E-07 | 8.49E-02 |
| Dstn    | 8.77E-09 | 2.68E-07 | 8.48E-02 |
| Desi2   | 8.98E-09 | 2.73E-07 | 8.47E-02 |
| Skp1a   | 9.11E-09 | 2.75E-07 | 8.47E-02 |
| Lhfpl2  | 9.11E-09 | 2.75E-07 | 8.47E-02 |
| Mif     | 9.24E-09 | 2.79E-07 | 8.47E-02 |
| Eri3    | 9.28E-09 | 2.79E-07 | 8.46E-02 |
| Mrpl43  | 9.31E-09 | 2.80E-07 | 8.46E-02 |
| Wdr83   | 9.55E-09 | 2.86E-07 | 8.46E-02 |
| Mrps14  | 9.67E-09 | 2.89E-07 | 8.45E-02 |
| Ift74   | 9.80E-09 | 2.92E-07 | 8.45E-02 |
| Lsm7    | 9.85E-09 | 2.93E-07 | 8.45E-02 |
| Steap3  | 9.93E-09 | 2.95E-07 | 8.45E-02 |
| Tm2d1   | 1.01E-08 | 2.99E-07 | 8.44E-02 |
| Sae1    | 1.02E-08 | 3.02E-07 | 8.44E-02 |
| Oxsm    | 1.04E-08 | 3.06E-07 | 8.44E-02 |
| Ier3ip1 | 1.04E-08 | 3.07E-07 | 8.44E-02 |
| Coq2    | 1.04E-08 | 3.07E-07 | 8.44E-02 |

|               |          |          |          |
|---------------|----------|----------|----------|
| Akip1         | 1.09E-08 | 3.19E-07 | 8.42E-02 |
| Dpp7          | 1.09E-08 | 3.19E-07 | 8.42E-02 |
| Lmna          | 1.09E-08 | 3.19E-07 | 8.42E-02 |
| Ndufb4        | 1.14E-08 | 3.30E-07 | 8.41E-02 |
| Nudcd2        | 1.15E-08 | 3.32E-07 | 8.41E-02 |
| Med29         | 1.16E-08 | 3.35E-07 | 8.41E-02 |
| Gm9774        | 1.17E-08 | 3.36E-07 | 8.41E-02 |
| Mrpl42        | 1.17E-08 | 3.37E-07 | 8.41E-02 |
| 1810058I24Rik | 1.18E-08 | 3.39E-07 | 8.40E-02 |
| Mrps25        | 1.20E-08 | 3.42E-07 | 8.40E-02 |
| Eci1          | 1.22E-08 | 3.47E-07 | 8.40E-02 |
| Snx12         | 1.26E-08 | 3.59E-07 | 8.39E-02 |
| Sash1         | 1.28E-08 | 3.62E-07 | 8.38E-02 |
| Trappc4       | 1.30E-08 | 3.65E-07 | 8.38E-02 |
| Deb1          | 1.30E-08 | 3.65E-07 | 8.38E-02 |
| Pcmt1         | 1.30E-08 | 3.66E-07 | 8.38E-02 |
| Mrps36        | 1.31E-08 | 3.67E-07 | 8.38E-02 |
| Ywhag         | 1.32E-08 | 3.69E-07 | 8.38E-02 |
| Ubash3b       | 1.33E-08 | 3.71E-07 | 8.37E-02 |
| Adam8         | 1.35E-08 | 3.75E-07 | 8.37E-02 |
| Tax1bp3       | 1.35E-08 | 3.75E-07 | 8.37E-02 |
| Ndufa1        | 1.39E-08 | 3.86E-07 | 8.36E-02 |
| Usp50         | 1.45E-08 | 3.99E-07 | 8.35E-02 |
| Dyntl3        | 1.45E-08 | 3.99E-07 | 8.35E-02 |
| Plin3         | 1.45E-08 | 3.99E-07 | 8.35E-02 |
| Btk           | 1.45E-08 | 3.99E-07 | 8.35E-02 |
| Ssr1          | 1.45E-08 | 3.99E-07 | 8.35E-02 |
| Fam213a       | 1.48E-08 | 4.08E-07 | 8.35E-02 |
| Gm10031       | 1.49E-08 | 4.08E-07 | 8.35E-02 |
| Bach2os       | 1.49E-08 | 4.08E-07 | 8.35E-02 |
| Mrpl55        | 1.53E-08 | 4.18E-07 | 8.34E-02 |
| Dlat          | 1.56E-08 | 4.25E-07 | 8.33E-02 |
| Otud6b        | 1.61E-08 | 4.37E-07 | 8.33E-02 |
| Timm10        | 1.62E-08 | 4.38E-07 | 8.33E-02 |
| Plec          | 1.67E-08 | 4.51E-07 | 8.32E-02 |
| Sap18         | 1.68E-08 | 4.53E-07 | 8.32E-02 |
| Col6a1        | 1.68E-08 | 4.53E-07 | 8.32E-02 |
| Rab2a         | 1.73E-08 | 4.66E-07 | 8.31E-02 |
| Clip1         | 1.74E-08 | 4.66E-07 | 8.31E-02 |
| Mrps16        | 1.74E-08 | 4.67E-07 | 8.31E-02 |
| Glo1          | 1.76E-08 | 4.69E-07 | 8.30E-02 |
| Bcas2         | 1.76E-08 | 4.69E-07 | 8.30E-02 |
| Slc37a2       | 1.76E-08 | 4.69E-07 | 8.30E-02 |
| Gm5426        | 1.76E-08 | 4.69E-07 | 8.30E-02 |

|               |          |          |          |
|---------------|----------|----------|----------|
| Ctnnb1        | 1.79E-08 | 4.75E-07 | 8.30E-02 |
| Itga9         | 1.84E-08 | 4.88E-07 | 8.29E-02 |
| Psm4          | 1.85E-08 | 4.90E-07 | 8.29E-02 |
| Rab1b         | 1.88E-08 | 4.96E-07 | 8.29E-02 |
| Ctsa          | 1.89E-08 | 4.99E-07 | 8.29E-02 |
| Dhrs1         | 1.90E-08 | 5.00E-07 | 8.28E-02 |
| Lrp12         | 1.92E-08 | 5.02E-07 | 8.28E-02 |
| Slc35b1       | 1.92E-08 | 5.02E-07 | 8.28E-02 |
| Papola        | 1.93E-08 | 5.05E-07 | 8.28E-02 |
| Mrpl20        | 1.94E-08 | 5.05E-07 | 8.28E-02 |
| Rnaseh2c      | 1.96E-08 | 5.10E-07 | 8.28E-02 |
| Plpp3         | 1.98E-08 | 5.15E-07 | 8.27E-02 |
| Atp6v0b       | 2.00E-08 | 5.17E-07 | 8.27E-02 |
| Nme2          | 2.00E-08 | 5.18E-07 | 8.27E-02 |
| Arl3          | 2.04E-08 | 5.27E-07 | 8.27E-02 |
| Zak           | 2.09E-08 | 5.38E-07 | 8.26E-02 |
| Ndufs5        | 2.10E-08 | 5.40E-07 | 8.26E-02 |
| Ube2v1        | 2.12E-08 | 5.43E-07 | 8.26E-02 |
| Vkorc1        | 2.13E-08 | 5.45E-07 | 8.26E-02 |
| Tspan3        | 2.13E-08 | 5.45E-07 | 8.26E-02 |
| S100a1        | 2.14E-08 | 5.47E-07 | 8.25E-02 |
| Tpi1          | 2.15E-08 | 5.48E-07 | 8.25E-02 |
| 2610001J05Rik | 2.19E-08 | 5.56E-07 | 8.25E-02 |
| Anxa2         | 2.21E-08 | 5.60E-07 | 8.25E-02 |
| Wbp1l         | 2.24E-08 | 5.67E-07 | 8.24E-02 |
| Mtss1         | 2.24E-08 | 5.67E-07 | 8.24E-02 |
| Lrrc27        | 2.26E-08 | 5.72E-07 | 8.24E-02 |
| Wsb2          | 2.29E-08 | 5.77E-07 | 8.24E-02 |
| Kcmf1         | 2.33E-08 | 5.84E-07 | 8.23E-02 |
| Pdia6         | 2.37E-08 | 5.93E-07 | 8.23E-02 |
| Npy           | 2.40E-08 | 5.99E-07 | 8.23E-02 |
| B430306N03Rik | 2.43E-08 | 6.04E-07 | 8.22E-02 |
| Cd63          | 2.46E-08 | 6.08E-07 | 8.22E-02 |
| Hdhd2         | 2.54E-08 | 6.24E-07 | 8.21E-02 |
| Psm4          | 2.60E-08 | 6.36E-07 | 8.21E-02 |
| Atp6v1e1      | 2.60E-08 | 6.36E-07 | 8.20E-02 |
| Acadsb        | 2.65E-08 | 6.47E-07 | 8.20E-02 |
| Tom1          | 2.76E-08 | 6.71E-07 | 8.19E-02 |
| Cript         | 2.77E-08 | 6.73E-07 | 8.19E-02 |
| Rdx           | 2.78E-08 | 6.74E-07 | 8.19E-02 |
| Bckdk         | 2.79E-08 | 6.75E-07 | 8.19E-02 |
| Tmem242       | 2.80E-08 | 6.77E-07 | 8.19E-02 |
| Vps4b         | 2.82E-08 | 6.81E-07 | 8.18E-02 |
| Psmg1         | 2.83E-08 | 6.82E-07 | 8.18E-02 |

|               |          |          |          |
|---------------|----------|----------|----------|
| Rfk           | 2.84E-08 | 6.83E-07 | 8.18E-02 |
| Gm12166       | 2.85E-08 | 6.83E-07 | 8.18E-02 |
| Ap1s1         | 2.89E-08 | 6.90E-07 | 8.18E-02 |
| Thap7         | 2.90E-08 | 6.91E-07 | 8.18E-02 |
| Dnajb14       | 2.94E-08 | 7.01E-07 | 8.17E-02 |
| Tns1          | 2.97E-08 | 7.06E-07 | 8.17E-02 |
| Faim          | 2.97E-08 | 7.06E-07 | 8.17E-02 |
| Tlk1          | 3.04E-08 | 7.21E-07 | 8.16E-02 |
| Rab6a         | 3.09E-08 | 7.30E-07 | 8.16E-02 |
| Ank           | 3.10E-08 | 7.31E-07 | 8.16E-02 |
| 0610010K14Rik | 3.24E-08 | 7.61E-07 | 8.15E-02 |
| Ndufs1        | 3.30E-08 | 7.73E-07 | 8.14E-02 |
| Tubb4b        | 3.33E-08 | 7.80E-07 | 8.14E-02 |
| Sdhc          | 3.43E-08 | 7.98E-07 | 8.13E-02 |
| Anpep         | 3.46E-08 | 8.03E-07 | 8.13E-02 |
| Pdcd6         | 3.46E-08 | 8.03E-07 | 8.13E-02 |
| Ywhaq         | 3.46E-08 | 8.03E-07 | 8.13E-02 |
| Glr2          | 3.48E-08 | 8.04E-07 | 8.13E-02 |
| Carkd         | 3.48E-08 | 8.04E-07 | 8.13E-02 |
| Gm7808        | 3.51E-08 | 8.07E-07 | 8.13E-02 |
| Tomm6         | 3.58E-08 | 8.22E-07 | 8.12E-02 |
| Bbip1         | 3.62E-08 | 8.27E-07 | 8.12E-02 |
| Akirin1       | 3.63E-08 | 8.27E-07 | 8.12E-02 |
| Fnip2         | 3.63E-08 | 8.27E-07 | 8.12E-02 |
| Apoo          | 3.65E-08 | 8.30E-07 | 8.12E-02 |
| Tpgs1         | 3.70E-08 | 8.40E-07 | 8.11E-02 |
| Secisbp2l     | 3.73E-08 | 8.44E-07 | 8.11E-02 |
| Dhx32         | 3.79E-08 | 8.56E-07 | 8.11E-02 |
| Wdr77         | 3.82E-08 | 8.60E-07 | 8.11E-02 |
| Gabarapl1     | 3.83E-08 | 8.60E-07 | 8.11E-02 |
| 2210016F16Rik | 3.84E-08 | 8.62E-07 | 8.10E-02 |
| Reep5         | 3.86E-08 | 8.66E-07 | 8.10E-02 |
| Zfp91         | 3.88E-08 | 8.69E-07 | 8.10E-02 |
| Mmadhc        | 3.88E-08 | 8.69E-07 | 8.10E-02 |
| Serpine2      | 3.90E-08 | 8.72E-07 | 8.10E-02 |
| Lyz1          | 3.91E-08 | 8.72E-07 | 8.10E-02 |
| 1500015O10Rik | 3.94E-08 | 8.78E-07 | 8.10E-02 |
| ldh3a         | 4.00E-08 | 8.91E-07 | 8.09E-02 |
| Tmem106b      | 4.04E-08 | 8.97E-07 | 8.09E-02 |
| Txnl4a        | 4.05E-08 | 8.97E-07 | 8.09E-02 |
| Sumf1         | 4.07E-08 | 8.98E-07 | 8.09E-02 |
| Atp1b3        | 4.07E-08 | 8.98E-07 | 8.09E-02 |
| Dtd2          | 4.08E-08 | 8.99E-07 | 8.09E-02 |
| Yeats4        | 4.09E-08 | 8.99E-07 | 8.09E-02 |



|               |          |          |          |
|---------------|----------|----------|----------|
| Hdgf          | 4.14E-08 | 9.09E-07 | 8.08E-02 |
| Timm22        | 4.18E-08 | 9.17E-07 | 8.08E-02 |
| Magt1         | 4.25E-08 | 9.31E-07 | 8.08E-02 |
| Gstm5         | 4.27E-08 | 9.35E-07 | 8.08E-02 |
| Nek6          | 4.34E-08 | 9.48E-07 | 8.07E-02 |
| Oaz2          | 4.35E-08 | 9.49E-07 | 8.07E-02 |
| Crtap         | 4.37E-08 | 9.52E-07 | 8.07E-02 |
| Snrnp27       | 4.39E-08 | 9.55E-07 | 8.07E-02 |
| Cib1          | 4.43E-08 | 9.62E-07 | 8.07E-02 |
| Cdv3          | 4.46E-08 | 9.67E-07 | 8.07E-02 |
| 1110004F10Rik | 4.46E-08 | 9.67E-07 | 8.07E-02 |
| Sdccag3       | 4.52E-08 | 9.76E-07 | 8.06E-02 |
| Pafah1b1      | 4.61E-08 | 9.93E-07 | 8.06E-02 |
| Ppa1          | 4.64E-08 | 9.97E-07 | 8.06E-02 |
| Angpt2        | 4.66E-08 | 1.00E-06 | 8.05E-02 |
| Cyb5r1        | 4.67E-08 | 1.00E-06 | 8.05E-02 |
| Zranb2        | 4.67E-08 | 1.00E-06 | 8.05E-02 |
| Mmp27         | 4.77E-08 | 1.02E-06 | 8.05E-02 |
| Sar1a         | 4.86E-08 | 1.03E-06 | 8.04E-02 |
| Bet1          | 4.87E-08 | 1.03E-06 | 8.04E-02 |
| Pkd1          | 4.97E-08 | 1.05E-06 | 8.04E-02 |
| Ap3m1         | 5.02E-08 | 1.06E-06 | 8.03E-02 |
| Pgrmc1        | 5.05E-08 | 1.06E-06 | 8.03E-02 |
| Eea1          | 5.05E-08 | 1.06E-06 | 8.03E-02 |
| Gm4950        | 5.11E-08 | 1.07E-06 | 8.03E-02 |
| Ormdl1        | 5.12E-08 | 1.07E-06 | 8.03E-02 |
| Myof          | 5.13E-08 | 1.07E-06 | 8.03E-02 |
| Snx3          | 5.17E-08 | 1.08E-06 | 8.03E-02 |
| Col5a2        | 5.29E-08 | 1.10E-06 | 8.02E-02 |
| Tmx4          | 5.41E-08 | 1.13E-06 | 8.01E-02 |
| Tbc1d7        | 5.48E-08 | 1.14E-06 | 8.01E-02 |
| Snrpd3        | 5.50E-08 | 1.14E-06 | 8.01E-02 |
| B3gat3        | 5.66E-08 | 1.17E-06 | 8.00E-02 |
| Coq7          | 5.68E-08 | 1.18E-06 | 8.00E-02 |
| Tmem120a      | 5.81E-08 | 1.20E-06 | 8.00E-02 |
| Cnih1         | 5.82E-08 | 1.20E-06 | 8.00E-02 |
| 0610009B22Rik | 5.83E-08 | 1.20E-06 | 8.00E-02 |
| Frrs1         | 5.91E-08 | 1.22E-06 | 7.99E-02 |
| Taldo1        | 5.95E-08 | 1.22E-06 | 7.99E-02 |
| Tceal8        | 5.96E-08 | 1.22E-06 | 7.99E-02 |
| Lrrfip2       | 5.97E-08 | 1.22E-06 | 7.99E-02 |
| Atp6ap1       | 5.98E-08 | 1.22E-06 | 7.99E-02 |
| Emc8          | 6.00E-08 | 1.23E-06 | 7.99E-02 |
| Gm5900        | 6.10E-08 | 1.25E-06 | 7.98E-02 |

|         |          |          |          |
|---------|----------|----------|----------|
| Cluh    | 6.21E-08 | 1.27E-06 | 7.98E-02 |
| Tmf1    | 6.33E-08 | 1.29E-06 | 7.97E-02 |
| Bnip3l  | 6.34E-08 | 1.29E-06 | 7.97E-02 |
| Atp5g2  | 6.41E-08 | 1.30E-06 | 7.97E-02 |
| Triap1  | 6.48E-08 | 1.31E-06 | 7.97E-02 |
| Glyr1   | 6.55E-08 | 1.32E-06 | 7.96E-02 |
| Zmynd8  | 6.56E-08 | 1.32E-06 | 7.96E-02 |
| Mrpl49  | 6.62E-08 | 1.34E-06 | 7.96E-02 |
| Zcrb1   | 6.63E-08 | 1.34E-06 | 7.96E-02 |
| Prelp   | 6.67E-08 | 1.34E-06 | 7.96E-02 |
| Tomm20  | 6.79E-08 | 1.36E-06 | 7.95E-02 |
| Eif1a   | 6.83E-08 | 1.37E-06 | 7.95E-02 |
| Snrpd1  | 6.84E-08 | 1.37E-06 | 7.95E-02 |
| Emc9    | 6.84E-08 | 1.37E-06 | 7.95E-02 |
| Ercc1   | 7.00E-08 | 1.39E-06 | 7.95E-02 |
| Emc3    | 7.06E-08 | 1.41E-06 | 7.94E-02 |
| March2  | 7.09E-08 | 1.41E-06 | 7.94E-02 |
| Ldha    | 7.28E-08 | 1.44E-06 | 7.94E-02 |
| Gm10320 | 7.32E-08 | 1.44E-06 | 7.94E-02 |
| Pqlc3   | 7.46E-08 | 1.47E-06 | 7.93E-02 |
| Hcfc1r1 | 7.51E-08 | 1.47E-06 | 7.93E-02 |
| Abtb1   | 7.52E-08 | 1.47E-06 | 7.93E-02 |
| Hexb    | 7.59E-08 | 1.49E-06 | 7.93E-02 |
| Nme1    | 7.65E-08 | 1.50E-06 | 7.92E-02 |
| Naglu   | 7.73E-08 | 1.51E-06 | 7.92E-02 |
| Cops3   | 7.86E-08 | 1.53E-06 | 7.92E-02 |
| Alg1    | 7.90E-08 | 1.54E-06 | 7.92E-02 |
| Spsb2   | 8.00E-08 | 1.55E-06 | 7.91E-02 |
| Brd7    | 8.05E-08 | 1.56E-06 | 7.91E-02 |
| Gm16286 | 8.07E-08 | 1.56E-06 | 7.91E-02 |
| Commd5  | 8.10E-08 | 1.56E-06 | 7.91E-02 |
| Abi3    | 8.31E-08 | 1.59E-06 | 7.90E-02 |
| Rfesd   | 8.39E-08 | 1.61E-06 | 7.90E-02 |
| Polr2m  | 8.44E-08 | 1.61E-06 | 7.90E-02 |
| Slc25a3 | 8.49E-08 | 1.62E-06 | 7.90E-02 |
| Abcd3   | 8.50E-08 | 1.62E-06 | 7.90E-02 |
| Ptgr1   | 8.62E-08 | 1.64E-06 | 7.89E-02 |
| Borcs7  | 8.62E-08 | 1.64E-06 | 7.89E-02 |
| Hmgn1   | 8.67E-08 | 1.64E-06 | 7.89E-02 |
| Polr2i  | 8.68E-08 | 1.65E-06 | 7.89E-02 |
| Cdc34   | 8.76E-08 | 1.65E-06 | 7.89E-02 |
| C1d     | 8.77E-08 | 1.65E-06 | 7.89E-02 |
| Cdk18   | 9.00E-08 | 1.69E-06 | 7.88E-02 |
| Tmem237 | 9.25E-08 | 1.73E-06 | 7.87E-02 |

|               |          |          |          |
|---------------|----------|----------|----------|
| Dapk3         | 9.29E-08 | 1.74E-06 | 7.87E-02 |
| Hpcal1        | 9.35E-08 | 1.74E-06 | 7.87E-02 |
| 5031439G07Rik | 9.36E-08 | 1.75E-06 | 7.87E-02 |
| Armcx3        | 9.39E-08 | 1.75E-06 | 7.87E-02 |
| Ormdl2        | 9.44E-08 | 1.75E-06 | 7.87E-02 |
| Sgcb          | 9.50E-08 | 1.76E-06 | 7.87E-02 |
| Mtch1         | 9.53E-08 | 1.77E-06 | 7.87E-02 |
| Hnrnpa1       | 9.54E-08 | 1.77E-06 | 7.86E-02 |
| Mbd3          | 9.58E-08 | 1.77E-06 | 7.86E-02 |
| Aig1          | 9.68E-08 | 1.79E-06 | 7.86E-02 |
| Tecr          | 9.81E-08 | 1.81E-06 | 7.86E-02 |
| Lsm8          | 9.91E-08 | 1.82E-06 | 7.85E-02 |
| Jagn1         | 9.97E-08 | 1.83E-06 | 7.85E-02 |
| Col6a3        | 1.01E-07 | 1.85E-06 | 7.85E-02 |
| 4930455G09Rik | 1.01E-07 | 1.85E-06 | 7.85E-02 |
| Calm3         | 1.01E-07 | 1.86E-06 | 7.85E-02 |
| 9530068E07Rik | 1.02E-07 | 1.86E-06 | 7.85E-02 |
| Clptm1l       | 1.03E-07 | 1.88E-06 | 7.84E-02 |
| Suclg1        | 1.03E-07 | 1.88E-06 | 7.84E-02 |
| Derl2         | 1.03E-07 | 1.88E-06 | 7.84E-02 |
| Sgk1          | 1.04E-07 | 1.89E-06 | 7.84E-02 |
| Ctcf          | 1.05E-07 | 1.90E-06 | 7.84E-02 |
| Txndc5        | 1.06E-07 | 1.92E-06 | 7.84E-02 |
| Aes           | 1.07E-07 | 1.94E-06 | 7.83E-02 |
| ltpa          | 1.08E-07 | 1.94E-06 | 7.83E-02 |
| Mien1         | 1.09E-07 | 1.96E-06 | 7.83E-02 |
| Acp1          | 1.09E-07 | 1.96E-06 | 7.83E-02 |
| Slc39a11      | 1.11E-07 | 1.98E-06 | 7.83E-02 |
| Tmem9b        | 1.11E-07 | 1.98E-06 | 7.83E-02 |
| Ppp2ca        | 1.12E-07 | 2.00E-06 | 7.82E-02 |
| Ten1          | 1.15E-07 | 2.05E-06 | 7.81E-02 |
| Serinc1       | 1.16E-07 | 2.06E-06 | 7.81E-02 |
| Ertec1        | 1.16E-07 | 2.06E-06 | 7.81E-02 |
| Nr2c2ap       | 1.16E-07 | 2.06E-06 | 7.81E-02 |
| Ubl4a         | 1.16E-07 | 2.06E-06 | 7.81E-02 |
| Agap1         | 1.17E-07 | 2.07E-06 | 7.81E-02 |
| Insig2        | 1.17E-07 | 2.08E-06 | 7.81E-02 |
| Gemin7        | 1.18E-07 | 2.09E-06 | 7.81E-02 |
| Trappc1       | 1.19E-07 | 2.09E-06 | 7.81E-02 |
| Taf12         | 1.22E-07 | 2.14E-06 | 7.80E-02 |
| Tardbp        | 1.22E-07 | 2.15E-06 | 7.80E-02 |
| Uchl3         | 1.24E-07 | 2.17E-06 | 7.80E-02 |
| Kcnq1ot1      | 1.24E-07 | 2.17E-06 | 7.79E-02 |
| Pigyl         | 1.24E-07 | 2.17E-06 | 7.79E-02 |

|               |          |          |          |
|---------------|----------|----------|----------|
| Zfp260        | 1.25E-07 | 2.19E-06 | 7.79E-02 |
| B230118H07Rik | 1.26E-07 | 2.20E-06 | 7.79E-02 |
| Ndufb2        | 1.26E-07 | 2.20E-06 | 7.79E-02 |
| Zcchc9        | 1.27E-07 | 2.20E-06 | 7.79E-02 |
| Mtpn          | 1.27E-07 | 2.21E-06 | 7.79E-02 |
| Map4k3        | 1.28E-07 | 2.21E-06 | 7.79E-02 |
| Scd1          | 1.28E-07 | 2.21E-06 | 7.79E-02 |
| Spr           | 1.28E-07 | 2.21E-06 | 7.79E-02 |
| Ap2m1         | 1.28E-07 | 2.21E-06 | 7.79E-02 |
| Znhit1        | 1.30E-07 | 2.24E-06 | 7.78E-02 |
| Polr2k        | 1.31E-07 | 2.24E-06 | 7.78E-02 |
| Wfs1          | 1.33E-07 | 2.27E-06 | 7.78E-02 |
| Coa4          | 1.33E-07 | 2.27E-06 | 7.78E-02 |
| Nudt9         | 1.36E-07 | 2.32E-06 | 7.77E-02 |
| Glud1         | 1.37E-07 | 2.33E-06 | 7.77E-02 |
| Trappc3       | 1.37E-07 | 2.33E-06 | 7.77E-02 |
| Pja2          | 1.39E-07 | 2.36E-06 | 7.76E-02 |
| Arhgap19      | 1.39E-07 | 2.37E-06 | 7.76E-02 |
| Gpx4          | 1.39E-07 | 2.37E-06 | 7.76E-02 |
| Rnf11         | 1.40E-07 | 2.37E-06 | 7.76E-02 |
| Rgs7          | 1.40E-07 | 2.37E-06 | 7.76E-02 |
| Ndufa8        | 1.41E-07 | 2.38E-06 | 7.76E-02 |
| Ctgf          | 1.41E-07 | 2.38E-06 | 7.76E-02 |
| Mnat1         | 1.42E-07 | 2.39E-06 | 7.76E-02 |
| Arl1          | 1.43E-07 | 2.40E-06 | 7.76E-02 |
| Psmd10        | 1.45E-07 | 2.45E-06 | 7.75E-02 |
| Asna1         | 1.47E-07 | 2.47E-06 | 7.75E-02 |
| Timp1         | 1.48E-07 | 2.49E-06 | 7.75E-02 |
| Bcap31        | 1.50E-07 | 2.51E-06 | 7.74E-02 |
| Mettl9        | 1.50E-07 | 2.51E-06 | 7.74E-02 |
| Paip2         | 1.50E-07 | 2.51E-06 | 7.74E-02 |
| Hadh          | 1.52E-07 | 2.54E-06 | 7.74E-02 |
| Anapc16       | 1.53E-07 | 2.54E-06 | 7.74E-02 |
| Isca2         | 1.53E-07 | 2.54E-06 | 7.74E-02 |
| Grpel1        | 1.53E-07 | 2.54E-06 | 7.74E-02 |
| Timp2         | 1.53E-07 | 2.54E-06 | 7.74E-02 |
| Smpd1         | 1.54E-07 | 2.55E-06 | 7.74E-02 |
| Klc1          | 1.54E-07 | 2.55E-06 | 7.74E-02 |
| Actn4         | 1.56E-07 | 2.58E-06 | 7.73E-02 |
| Pafah1b2      | 1.57E-07 | 2.58E-06 | 7.73E-02 |
| Pcbp1         | 1.61E-07 | 2.64E-06 | 7.72E-02 |
| Dmxl2         | 1.61E-07 | 2.65E-06 | 7.72E-02 |
| Phb           | 1.62E-07 | 2.66E-06 | 7.72E-02 |
| Gabarapl2     | 1.62E-07 | 2.66E-06 | 7.72E-02 |

|               |          |          |          |
|---------------|----------|----------|----------|
| Lrrfip1       | 1.63E-07 | 2.67E-06 | 7.72E-02 |
| Itgax         | 1.63E-07 | 2.68E-06 | 7.72E-02 |
| Daglb         | 1.65E-07 | 2.69E-06 | 7.72E-02 |
| Pcbd2         | 1.70E-07 | 2.77E-06 | 7.71E-02 |
| Lpxn          | 1.72E-07 | 2.79E-06 | 7.71E-02 |
| Man1c1        | 1.75E-07 | 2.82E-06 | 7.70E-02 |
| Fis1          | 1.75E-07 | 2.83E-06 | 7.70E-02 |
| Pithd1        | 1.76E-07 | 2.84E-06 | 7.70E-02 |
| Abi1          | 1.76E-07 | 2.84E-06 | 7.70E-02 |
| Wbp11         | 1.78E-07 | 2.87E-06 | 7.70E-02 |
| Ado           | 1.80E-07 | 2.90E-06 | 7.69E-02 |
| Gm11273       | 1.81E-07 | 2.90E-06 | 7.69E-02 |
| Rhoc          | 1.81E-07 | 2.91E-06 | 7.69E-02 |
| Hint2         | 1.85E-07 | 2.96E-06 | 7.69E-02 |
| 2310033P09Rik | 1.86E-07 | 2.97E-06 | 7.69E-02 |
| Aqp1          | 1.87E-07 | 2.98E-06 | 7.68E-02 |
| Mrpl12        | 1.87E-07 | 2.99E-06 | 7.68E-02 |
| Eif3i         | 1.90E-07 | 3.02E-06 | 7.68E-02 |
| Scamp3        | 1.92E-07 | 3.04E-06 | 7.68E-02 |
| Inf2          | 1.92E-07 | 3.05E-06 | 7.68E-02 |
| Hmg20b        | 1.93E-07 | 3.05E-06 | 7.68E-02 |
| Dohh          | 1.94E-07 | 3.07E-06 | 7.67E-02 |
| Sec11c        | 1.94E-07 | 3.07E-06 | 7.67E-02 |
| Mgat1         | 1.95E-07 | 3.09E-06 | 7.67E-02 |
| Smg1          | 1.96E-07 | 3.09E-06 | 7.67E-02 |
| Rnf187        | 1.96E-07 | 3.09E-06 | 7.67E-02 |
| Atp6v1g1      | 1.99E-07 | 3.13E-06 | 7.67E-02 |
| Tprgl         | 2.00E-07 | 3.15E-06 | 7.66E-02 |
| Tarbp2        | 2.06E-07 | 3.22E-06 | 7.66E-02 |
| Rwdd4a        | 2.06E-07 | 3.22E-06 | 7.66E-02 |
| Hmbs          | 2.06E-07 | 3.23E-06 | 7.66E-02 |
| Grcc10        | 2.07E-07 | 3.23E-06 | 7.66E-02 |
| 2310011J03Rik | 2.07E-07 | 3.24E-06 | 7.66E-02 |
| Cct5          | 2.09E-07 | 3.26E-06 | 7.65E-02 |
| Fnta          | 2.10E-07 | 3.27E-06 | 7.65E-02 |
| Atp5c1        | 2.11E-07 | 3.28E-06 | 7.65E-02 |
| Kpna2         | 2.12E-07 | 3.29E-06 | 7.65E-02 |
| Cd300lb       | 2.12E-07 | 3.29E-06 | 7.65E-02 |
| Rexo2         | 2.13E-07 | 3.30E-06 | 7.65E-02 |
| Tmem38b       | 2.17E-07 | 3.36E-06 | 7.64E-02 |
| Mesdc1        | 2.22E-07 | 3.42E-06 | 7.64E-02 |
| Acp5          | 2.22E-07 | 3.42E-06 | 7.64E-02 |
| Psme4         | 2.23E-07 | 3.43E-06 | 7.64E-02 |
| Irak1         | 2.23E-07 | 3.43E-06 | 7.63E-02 |

|            |          |          |          |
|------------|----------|----------|----------|
| Sdhb       | 2.25E-07 | 3.45E-06 | 7.63E-02 |
| Tmem43     | 2.25E-07 | 3.46E-06 | 7.63E-02 |
| Ndufa5     | 2.26E-07 | 3.46E-06 | 7.63E-02 |
| Ufc1       | 2.31E-07 | 3.53E-06 | 7.63E-02 |
| Npc1       | 2.31E-07 | 3.53E-06 | 7.63E-02 |
| Gadd45gip1 | 2.32E-07 | 3.54E-06 | 7.62E-02 |
| Galnt6     | 2.33E-07 | 3.55E-06 | 7.62E-02 |
| Sumo3      | 2.34E-07 | 3.55E-06 | 7.62E-02 |
| Dctn4      | 2.36E-07 | 3.59E-06 | 7.62E-02 |
| Mrpl13     | 2.37E-07 | 3.60E-06 | 7.62E-02 |
| Dph3       | 2.41E-07 | 3.65E-06 | 7.61E-02 |
| Psen2      | 2.42E-07 | 3.66E-06 | 7.61E-02 |
| Agpat5     | 2.44E-07 | 3.69E-06 | 7.61E-02 |
| Armc1      | 2.44E-07 | 3.69E-06 | 7.61E-02 |
| Aspscr1    | 2.45E-07 | 3.69E-06 | 7.61E-02 |
| Csnk2b     | 2.45E-07 | 3.70E-06 | 7.61E-02 |
| Serpine1   | 2.47E-07 | 3.71E-06 | 7.61E-02 |
| Ndufab1    | 2.47E-07 | 3.71E-06 | 7.61E-02 |
| Psmc9      | 2.50E-07 | 3.75E-06 | 7.60E-02 |
| Cyb561d2   | 2.56E-07 | 3.83E-06 | 7.60E-02 |
| Ergic1     | 2.57E-07 | 3.83E-06 | 7.60E-02 |
| Pmepa1     | 2.59E-07 | 3.86E-06 | 7.59E-02 |
| Ece2       | 2.62E-07 | 3.90E-06 | 7.59E-02 |
| Txnrd1     | 2.63E-07 | 3.90E-06 | 7.59E-02 |
| Flna       | 2.64E-07 | 3.91E-06 | 7.59E-02 |
| Cav2       | 2.64E-07 | 3.91E-06 | 7.59E-02 |
| Hist1h2bc  | 2.64E-07 | 3.92E-06 | 7.59E-02 |
| Myh9       | 2.66E-07 | 3.94E-06 | 7.59E-02 |
| Pofut2     | 2.67E-07 | 3.95E-06 | 7.59E-02 |
| Cd93       | 2.68E-07 | 3.96E-06 | 7.58E-02 |
| Ost4       | 2.69E-07 | 3.97E-06 | 7.58E-02 |
| Htatsf1    | 2.69E-07 | 3.97E-06 | 7.58E-02 |
| Atp6v0a1   | 2.71E-07 | 4.00E-06 | 7.58E-02 |
| Lsm4       | 2.76E-07 | 4.04E-06 | 7.58E-02 |
| Fam213b    | 2.76E-07 | 4.04E-06 | 7.58E-02 |
| Zfp706     | 2.76E-07 | 4.04E-06 | 7.58E-02 |
| Sec13      | 2.77E-07 | 4.04E-06 | 7.58E-02 |
| Pum2       | 2.77E-07 | 4.05E-06 | 7.58E-02 |
| Mtg1       | 2.78E-07 | 4.05E-06 | 7.58E-02 |
| Itpril2    | 2.78E-07 | 4.05E-06 | 7.57E-02 |
| Mustn1     | 2.79E-07 | 4.06E-06 | 7.57E-02 |
| Rell1      | 2.79E-07 | 4.06E-06 | 7.57E-02 |
| Tceanc2    | 2.80E-07 | 4.07E-06 | 7.57E-02 |
| Sec63      | 2.80E-07 | 4.07E-06 | 7.57E-02 |

|           |          |          |          |
|-----------|----------|----------|----------|
| Mocos     | 2.81E-07 | 4.07E-06 | 7.57E-02 |
| Slc25a39  | 2.87E-07 | 4.15E-06 | 7.57E-02 |
| Gm10073   | 2.90E-07 | 4.19E-06 | 7.56E-02 |
| Lgals1    | 2.91E-07 | 4.20E-06 | 7.56E-02 |
| Ddx18     | 2.91E-07 | 4.20E-06 | 7.56E-02 |
| Ostm1     | 2.91E-07 | 4.20E-06 | 7.56E-02 |
| Trp53inp2 | 2.93E-07 | 4.22E-06 | 7.56E-02 |
| Cd276     | 2.94E-07 | 4.23E-06 | 7.56E-02 |
| Hspb1     | 2.95E-07 | 4.23E-06 | 7.56E-02 |
| Rpp25l    | 2.95E-07 | 4.23E-06 | 7.56E-02 |
| Tsn       | 2.99E-07 | 4.28E-06 | 7.55E-02 |
| Mtfr1     | 2.99E-07 | 4.29E-06 | 7.55E-02 |
| Asph      | 3.06E-07 | 4.37E-06 | 7.55E-02 |
| Ssr3      | 3.06E-07 | 4.37E-06 | 7.55E-02 |
| Tnfrsf1b  | 3.12E-07 | 4.44E-06 | 7.54E-02 |
| Bloc1s1   | 3.13E-07 | 4.46E-06 | 7.54E-02 |
| Pigp      | 3.14E-07 | 4.46E-06 | 7.54E-02 |
| Fam214b   | 3.17E-07 | 4.50E-06 | 7.54E-02 |
| Ppp1r14b  | 3.24E-07 | 4.58E-06 | 7.53E-02 |
| Myo9b     | 3.33E-07 | 4.70E-06 | 7.52E-02 |
| Orc2      | 3.33E-07 | 4.70E-06 | 7.52E-02 |
| Tmed4     | 3.39E-07 | 4.76E-06 | 7.52E-02 |
| Chchd7    | 3.40E-07 | 4.77E-06 | 7.52E-02 |
| Nucks1    | 3.44E-07 | 4.82E-06 | 7.52E-02 |
| Upf1      | 3.44E-07 | 4.82E-06 | 7.52E-02 |
| Nabp2     | 3.45E-07 | 4.83E-06 | 7.51E-02 |
| Rab11b    | 3.46E-07 | 4.84E-06 | 7.51E-02 |
| Fkbp4     | 3.49E-07 | 4.88E-06 | 7.51E-02 |
| St13      | 3.51E-07 | 4.90E-06 | 7.51E-02 |
| Cnpy2     | 3.52E-07 | 4.91E-06 | 7.51E-02 |
| Snx24     | 3.54E-07 | 4.93E-06 | 7.51E-02 |
| Sars      | 3.55E-07 | 4.94E-06 | 7.51E-02 |
| Gid8      | 3.67E-07 | 5.09E-06 | 7.50E-02 |
| Crls1     | 3.68E-07 | 5.09E-06 | 7.50E-02 |
| Pls3      | 3.69E-07 | 5.10E-06 | 7.50E-02 |
| Pqlc1     | 3.74E-07 | 5.15E-06 | 7.49E-02 |
| Simap     | 3.74E-07 | 5.15E-06 | 7.49E-02 |
| Cxcl12    | 3.75E-07 | 5.17E-06 | 7.49E-02 |
| Emd       | 3.79E-07 | 5.21E-06 | 7.49E-02 |
| Wdr74     | 3.79E-07 | 5.21E-06 | 7.49E-02 |
| Il18bp    | 3.85E-07 | 5.29E-06 | 7.48E-02 |
| Tsen34    | 3.86E-07 | 5.29E-06 | 7.48E-02 |
| Iscu      | 3.88E-07 | 5.32E-06 | 7.48E-02 |
| Ddx56     | 3.89E-07 | 5.32E-06 | 7.48E-02 |

|          |          |          |           |
|----------|----------|----------|-----------|
| Snapiin  | 3.91E-07 | 5.34E-06 | 7.48E-02  |
| Mea1     | 3.92E-07 | 5.36E-06 | 7.48E-02  |
| Nudt4    | 4.00E-07 | 5.46E-06 | 7.47E-02  |
| Dnajc10  | 4.02E-07 | 5.48E-06 | 7.47E-02  |
| Cnbp     | 4.04E-07 | 5.50E-06 | 7.47E-02  |
| Rnf149   | 4.06E-07 | 5.51E-06 | 7.47E-02  |
| Stra6l   | 4.13E-07 | 5.60E-06 | 7.46E-02  |
| Ccdc124  | 4.15E-07 | 5.63E-06 | 7.46E-02  |
| Thyn1    | 4.16E-07 | 5.64E-06 | 7.46E-02  |
| Clec4d   | 4.19E-07 | 5.67E-06 | 7.46E-02  |
| Rap2a    | 4.23E-07 | 5.72E-06 | 7.46E-02  |
| Wbp4     | 4.24E-07 | 5.72E-06 | 7.46E-02  |
| Scarb2   | 4.25E-07 | 5.72E-06 | 7.46E-02  |
| Snip1    | 4.29E-07 | 5.77E-06 | 7.45E-02  |
| Gm13305  | 4.30E-07 | 5.78E-06 | 7.45E-02  |
| Fastkd3  | 4.35E-07 | 5.83E-06 | 7.45E-02  |
| Tceb1    | 4.36E-07 | 5.84E-06 | 7.45E-02  |
| Josd2    | 4.37E-07 | 5.84E-06 | 7.45E-02  |
| Col18a1  | 4.37E-07 | 5.84E-06 | 7.45E-02  |
| Yipf5    | 4.38E-07 | 5.84E-06 | 7.45E-02  |
| Oxa1l    | 4.40E-07 | 5.87E-06 | 7.45E-02  |
| Ube3a    | 4.41E-07 | 5.87E-06 | 7.45E-02  |
| Pex2     | 4.42E-07 | 5.88E-06 | 7.45E-02  |
| Fkbp1a   | 4.43E-07 | 5.89E-06 | 7.44E-02  |
| Slirp    | 4.45E-07 | 5.90E-06 | 7.44E-02  |
| Calr     | 4.47E-07 | 5.93E-06 | 7.44E-02  |
| Gm561    | 4.56E-07 | 6.04E-06 | 7.44E-02  |
| Anxa3    | 4.57E-07 | 6.04E-06 | 7.44E-02  |
| Rps29    | 4.59E-07 | 6.06E-06 | -7.43E-02 |
| Mphosph6 | 4.59E-07 | 6.06E-06 | 7.43E-02  |
| Col6a2   | 4.65E-07 | 6.13E-06 | 7.43E-02  |
| Pkp4     | 4.66E-07 | 6.13E-06 | 7.43E-02  |
| Slc25a1  | 4.69E-07 | 6.17E-06 | 7.43E-02  |
| Tmem50b  | 4.70E-07 | 6.18E-06 | 7.43E-02  |
| Vcam1    | 4.72E-07 | 6.21E-06 | 7.43E-02  |
| Sncg     | 4.74E-07 | 6.22E-06 | 7.43E-02  |
| Adprhl2  | 4.76E-07 | 6.23E-06 | 7.42E-02  |
| Top1     | 4.78E-07 | 6.26E-06 | 7.42E-02  |
| Denr     | 4.81E-07 | 6.29E-06 | 7.42E-02  |
| Slc25a5  | 4.81E-07 | 6.29E-06 | 7.42E-02  |
| Actr10   | 4.83E-07 | 6.29E-06 | 7.42E-02  |
| Wrb      | 4.83E-07 | 6.29E-06 | 7.42E-02  |
| Cpeb4    | 4.84E-07 | 6.30E-06 | 7.42E-02  |
| Vegfb    | 4.86E-07 | 6.32E-06 | 7.42E-02  |



|          |          |          |          |
|----------|----------|----------|----------|
| Hrsp12   | 4.91E-07 | 6.38E-06 | 7.42E-02 |
| Rragc    | 5.01E-07 | 6.50E-06 | 7.41E-02 |
| Ptms     | 5.03E-07 | 6.50E-06 | 7.41E-02 |
| Gsk3a    | 5.03E-07 | 6.50E-06 | 7.41E-02 |
| Gm10260  | 5.08E-07 | 6.56E-06 | 7.41E-02 |
| Eepd1    | 5.11E-07 | 6.59E-06 | 7.40E-02 |
| Pop5     | 5.14E-07 | 6.61E-06 | 7.40E-02 |
| Caml     | 5.14E-07 | 6.62E-06 | 7.40E-02 |
| Med8     | 5.16E-07 | 6.63E-06 | 7.40E-02 |
| Ddb1     | 5.19E-07 | 6.66E-06 | 7.40E-02 |
| Zbtb7a   | 5.20E-07 | 6.67E-06 | 7.40E-02 |
| Trim35   | 5.22E-07 | 6.69E-06 | 7.40E-02 |
| Max      | 5.23E-07 | 6.70E-06 | 7.40E-02 |
| Vimp     | 5.26E-07 | 6.73E-06 | 7.40E-02 |
| Trim47   | 5.31E-07 | 6.78E-06 | 7.39E-02 |
| Hey1     | 5.32E-07 | 6.79E-06 | 7.39E-02 |
| Sdc1     | 5.36E-07 | 6.84E-06 | 7.39E-02 |
| Tcf12    | 5.42E-07 | 6.90E-06 | 7.39E-02 |
| Snx1     | 5.44E-07 | 6.91E-06 | 7.39E-02 |
| Shisa9   | 5.50E-07 | 6.98E-06 | 7.38E-02 |
| Syt11    | 5.54E-07 | 7.02E-06 | 7.38E-02 |
| Ptges3   | 5.59E-07 | 7.07E-06 | 7.38E-02 |
| Pgk1     | 5.64E-07 | 7.12E-06 | 7.38E-02 |
| Ppp2r1a  | 5.64E-07 | 7.12E-06 | 7.38E-02 |
| Lima1    | 5.66E-07 | 7.14E-06 | 7.38E-02 |
| Kif5b    | 5.67E-07 | 7.14E-06 | 7.38E-02 |
| Mob2     | 5.68E-07 | 7.15E-06 | 7.37E-02 |
| Acaa1a   | 5.68E-07 | 7.15E-06 | 7.37E-02 |
| Pcnx     | 5.72E-07 | 7.19E-06 | 7.37E-02 |
| Akr7a5   | 5.74E-07 | 7.21E-06 | 7.37E-02 |
| Fam103a1 | 5.77E-07 | 7.24E-06 | 7.37E-02 |
| Edem2    | 5.79E-07 | 7.26E-06 | 7.37E-02 |
| Stam2    | 5.88E-07 | 7.35E-06 | 7.37E-02 |
| Kcnn4    | 5.88E-07 | 7.35E-06 | 7.37E-02 |
| Dars     | 6.06E-07 | 7.56E-06 | 7.36E-02 |
| Dirc2    | 6.06E-07 | 7.56E-06 | 7.36E-02 |
| Fam3c    | 6.07E-07 | 7.56E-06 | 7.36E-02 |
| Mrpl14   | 6.08E-07 | 7.57E-06 | 7.36E-02 |
| Ndufaf2  | 6.09E-07 | 7.58E-06 | 7.35E-02 |
| Al413582 | 6.11E-07 | 7.59E-06 | 7.35E-02 |
| Nono     | 6.12E-07 | 7.60E-06 | 7.35E-02 |
| Trabd    | 6.13E-07 | 7.61E-06 | 7.35E-02 |
| Rrs1     | 6.16E-07 | 7.63E-06 | 7.35E-02 |
| Creg2    | 6.16E-07 | 7.63E-06 | 7.35E-02 |

|               |          |          |          |
|---------------|----------|----------|----------|
| Gnaq          | 6.19E-07 | 7.66E-06 | 7.35E-02 |
| Emilin1       | 6.20E-07 | 7.66E-06 | 7.35E-02 |
| Man2a1        | 6.20E-07 | 7.66E-06 | 7.35E-02 |
| Mrpl50        | 6.21E-07 | 7.67E-06 | 7.35E-02 |
| Snx14         | 6.23E-07 | 7.68E-06 | 7.35E-02 |
| Mrps26        | 6.27E-07 | 7.73E-06 | 7.35E-02 |
| Hsbp1         | 6.33E-07 | 7.79E-06 | 7.34E-02 |
| Bsg           | 6.36E-07 | 7.82E-06 | 7.34E-02 |
| Neurl2        | 6.45E-07 | 7.91E-06 | 7.34E-02 |
| Rnaseh2b      | 6.53E-07 | 8.00E-06 | 7.34E-02 |
| Ptp4a2        | 6.57E-07 | 8.05E-06 | 7.33E-02 |
| Elof1         | 6.60E-07 | 8.07E-06 | 7.33E-02 |
| Vcl           | 6.67E-07 | 8.13E-06 | 7.33E-02 |
| Exoc3l4       | 6.69E-07 | 8.15E-06 | 7.33E-02 |
| Med28         | 6.69E-07 | 8.15E-06 | 7.33E-02 |
| Rps27l        | 6.72E-07 | 8.17E-06 | 7.33E-02 |
| Fkbp3         | 6.74E-07 | 8.19E-06 | 7.33E-02 |
| Hspbp1        | 6.77E-07 | 8.21E-06 | 7.32E-02 |
| Myl6          | 6.80E-07 | 8.25E-06 | 7.32E-02 |
| Sav1          | 6.83E-07 | 8.28E-06 | 7.32E-02 |
| Stxbp2        | 6.88E-07 | 8.33E-06 | 7.32E-02 |
| Hmox2         | 6.91E-07 | 8.35E-06 | 7.32E-02 |
| Gsr           | 6.92E-07 | 8.35E-06 | 7.32E-02 |
| 1500011K16Rik | 6.93E-07 | 8.35E-06 | 7.32E-02 |
| Usp16         | 6.95E-07 | 8.38E-06 | 7.32E-02 |
| Rp9           | 6.97E-07 | 8.39E-06 | 7.32E-02 |
| Tmem167       | 6.99E-07 | 8.41E-06 | 7.32E-02 |
| Eva1b         | 7.00E-07 | 8.41E-06 | 7.32E-02 |
| Pwwp2b        | 7.04E-07 | 8.45E-06 | 7.31E-02 |
| Tuba1c        | 7.09E-07 | 8.50E-06 | 7.31E-02 |
| Ubxn8         | 7.10E-07 | 8.51E-06 | 7.31E-02 |
| Med25         | 7.12E-07 | 8.53E-06 | 7.31E-02 |
| Aggf1         | 7.15E-07 | 8.55E-06 | 7.31E-02 |
| Dpy30         | 7.20E-07 | 8.59E-06 | 7.31E-02 |
| Zc3h15        | 7.27E-07 | 8.67E-06 | 7.30E-02 |
| Lztr1         | 7.30E-07 | 8.70E-06 | 7.30E-02 |
| Ndrp1         | 7.35E-07 | 8.75E-06 | 7.30E-02 |
| Gas2l1        | 7.40E-07 | 8.80E-06 | 7.30E-02 |
| Abcf2         | 7.56E-07 | 8.97E-06 | 7.29E-02 |
| Svbp          | 7.65E-07 | 9.06E-06 | 7.29E-02 |
| Ubfd1         | 7.69E-07 | 9.09E-06 | 7.29E-02 |
| Map2k3        | 7.76E-07 | 9.16E-06 | 7.29E-02 |
| Csnk2a1       | 7.82E-07 | 9.22E-06 | 7.28E-02 |
| Prkaca        | 7.86E-07 | 9.26E-06 | 7.28E-02 |

|          |          |          |          |
|----------|----------|----------|----------|
| Fbxl15   | 7.86E-07 | 9.26E-06 | 7.28E-02 |
| Mrpl28   | 7.92E-07 | 9.32E-06 | 7.28E-02 |
| Qars     | 7.97E-07 | 9.37E-06 | 7.28E-02 |
| Yif1a    | 7.98E-07 | 9.37E-06 | 7.28E-02 |
| Mitf     | 7.98E-07 | 9.37E-06 | 7.28E-02 |
| Fam32a   | 7.99E-07 | 9.37E-06 | 7.28E-02 |
| Usp9x    | 8.04E-07 | 9.42E-06 | 7.28E-02 |
| Rab35    | 8.09E-07 | 9.47E-06 | 7.27E-02 |
| Dgcr6    | 8.19E-07 | 9.57E-06 | 7.27E-02 |
| Ubr7     | 8.20E-07 | 9.57E-06 | 7.27E-02 |
| Gcsh     | 8.21E-07 | 9.57E-06 | 7.27E-02 |
| Mrps18a  | 8.25E-07 | 9.61E-06 | 7.27E-02 |
| Colgalt1 | 8.31E-07 | 9.68E-06 | 7.27E-02 |
| Mcoln3   | 8.32E-07 | 9.68E-06 | 7.27E-02 |
| Snx27    | 8.35E-07 | 9.71E-06 | 7.26E-02 |
| Abca1    | 8.39E-07 | 9.75E-06 | 7.26E-02 |
| Tmem230  | 8.44E-07 | 9.80E-06 | 7.26E-02 |
| Lars2    | 8.59E-07 | 9.95E-06 | 7.26E-02 |
| Dnajc7   | 8.63E-07 | 9.99E-06 | 7.26E-02 |
| Nagpa    | 8.64E-07 | 9.99E-06 | 7.26E-02 |
| Slc38a1  | 8.64E-07 | 9.99E-06 | 7.25E-02 |

**Table S10.** List of main cholesterol esters (CE) and oxidized CE detected in lesions of 20-week-old LDAH<sup>+/+</sup>/apoE<sup>-/-</sup> (n=6) and LDAH<sup>-/-</sup>/apoE<sup>-/-</sup> (n=5) male littermate mice. Formulas and candidate lipids were obtained from m/z values inputs into LIPID MAPS “Bulk” Structure Searches tool. Two-tailed Mann-Whitney U test was used for CE 18:3, CE 20:5, and CE 22:6;O. All other comparisons were performed using two-tailed unpaired *t*-test.

| m/z      | Abduct         | Formula   | Lipid     | Ratio Tg/WT | p-value |
|----------|----------------|-----------|-----------|-------------|---------|
| 663.5477 | K <sup>+</sup> | C43H76O2K | CE 16:0   | 0.464       | 0.0099  |
| 661.532  | K <sup>+</sup> | C43H74O2K | CE 16:1   | 0.460       | 0.1465  |
| 691.5789 | K <sup>+</sup> | C45H80O2K | CE 18:0   | 0.407       | 0.0199  |
| 689.5633 | K <sup>+</sup> | C45H78O2K | CE 18:1   | 0.625       | 0.0838  |
| 687.5476 | K <sup>+</sup> | C45H76O2K | CE 18:2   | 0.739       | 0.1372  |
| 685.5319 | K <sup>+</sup> | C45H74O2K | CE 18:3   | 0.612       | 0.0519  |
| 715.579  | K <sup>+</sup> | C47H80O2K | CE 20:2   | 0.414       | 0.093   |
| 713.5634 | K <sup>+</sup> | C47H78O2K | CE 20:3   | 0.519       | 0.0511  |
| 711.5481 | K <sup>+</sup> | C47H76O2K | CE 20:4   | 0.649       | 0.0446  |
| 709.532  | K <sup>+</sup> | C47H74O2K | CE 20:5   | 0.642       | 0.1255  |
| 739.5792 | K <sup>+</sup> | C49H80O2K | CE 22:4   | 0.396       | 0.0239  |
| 737.5634 | K <sup>+</sup> | C49H78O2K | CE 22:5   | 0.522       | 0.062   |
| 735.5478 | K <sup>+</sup> | C49H76O2K | CE 22:6   | 0.590       | 0.0759  |
| 705.5583 | K <sup>+</sup> | C45H78O3K | CE 18:1;O | 0.476       | 0.1071  |
| 703.5425 | K <sup>+</sup> | C45H76O3K | CE 18:2;O | 0.593       | 0.1622  |
| 701.5269 | K <sup>+</sup> | C45H74O3K | CE 18:3;O | 0.651       | 0.371   |
| 727.5428 | K <sup>+</sup> | C47H76O3K | CE 20:4;O | 0.628       | 0.2468  |
| 751.5424 | K <sup>+</sup> | C49H76O3K | CE 22:6;O | 0.454       | 0.1204  |
